# Supplementary material for: INvolvement of breast CAncer patients during oncological consultations: a multicentre randomised controlled trial—the INCA study protocol
Source: PubMed Central journal article supplement — BMJ Open. 2013 May 2;3(5):e002266. doi: 10.1136/bmjopen-2012-002266 (PMC3646182; doi:10.1136/bmjopen-2012-002266), 2013-05-02
Supplement: bmjopen-2012-002266.draft_revisions.pdf [file bmjopen-2012-002266.draft_revisions.pdf]

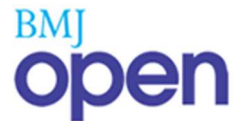

**The INvolvement of breast CANcer patients during oncological consultations. A multi-centre randomized controlled trial. The INCA study protocol.**

|                                 |                                                                                                                                                                                                                                                                                                                                                                                                                                                                                                                                                                                                                                                                                                                                                                                                                                                                                                                                                                                                                                                                                    |
|---------------------------------|------------------------------------------------------------------------------------------------------------------------------------------------------------------------------------------------------------------------------------------------------------------------------------------------------------------------------------------------------------------------------------------------------------------------------------------------------------------------------------------------------------------------------------------------------------------------------------------------------------------------------------------------------------------------------------------------------------------------------------------------------------------------------------------------------------------------------------------------------------------------------------------------------------------------------------------------------------------------------------------------------------------------------------------------------------------------------------|
| Journal:                        | <i>BMJ Open</i>                                                                                                                                                                                                                                                                                                                                                                                                                                                                                                                                                                                                                                                                                                                                                                                                                                                                                                                                                                                                                                                                    |
| Manuscript ID:                  | bmjopen-2012-002266                                                                                                                                                                                                                                                                                                                                                                                                                                                                                                                                                                                                                                                                                                                                                                                                                                                                                                                                                                                                                                                                |
| Article Type:                   | Protocol                                                                                                                                                                                                                                                                                                                                                                                                                                                                                                                                                                                                                                                                                                                                                                                                                                                                                                                                                                                                                                                                           |
| Date Submitted by the Author:   | 25-Oct-2012                                                                                                                                                                                                                                                                                                                                                                                                                                                                                                                                                                                                                                                                                                                                                                                                                                                                                                                                                                                                                                                                        |
| Complete List of Authors:       | Goss, Claudia; University of Verona<br>Ghilardi, Alberto; University of Brescia,<br>Deledda, giuseppe; University of Verona,<br>Buizza, Chiara; University of Brescia,<br>Bottacini, Alessandro; University of Verona,<br>Del Piccolo, Lidia; University of Verona,<br>Rimondini, Michela; University of Verona,<br>Chiodera, Federica; University of Verona,<br>Mazzi, Maria Angela; University of Verona,<br>Ballarin, Mario; University of Verona,<br>Bighelli, Irene; University of Verona,<br>Strepparava, Maria Grazia; University of Milano-Bicocca,<br>Molino, Annamaria; Hospital Trust, Verona,<br>Fiorio, Elena; Hospital Trust, Verona,<br>Nortilli, Rolando; Hospital Trust, Verona,<br>Caliolo, Chiara; Hospital Trust, Verona,<br>Zuliani, Serena; Hospital Trust, Verona,<br>Auriemma, Alessandra; Hospital Trust, Verona,<br>Maspero, Federica; Hospital Trust, Verona,<br>Simoncini, Edda; Spedali Civili, Brescia,<br>Ragni, Fulvio; Spedali Civili, Brescia,<br>Brown, Richard; Vrginia Commonwealth University,<br>Zimmermann, Christa; University of Verona, |
| <b>Primary Subject Heading</b>: | Oncology                                                                                                                                                                                                                                                                                                                                                                                                                                                                                                                                                                                                                                                                                                                                                                                                                                                                                                                                                                                                                                                                           |
| Secondary Subject Heading:      | Patient-centred medicine                                                                                                                                                                                                                                                                                                                                                                                                                                                                                                                                                                                                                                                                                                                                                                                                                                                                                                                                                                                                                                                           |
| Keywords:                       | patient involvement, breast cancer, docotr-pateint communication                                                                                                                                                                                                                                                                                                                                                                                                                                                                                                                                                                                                                                                                                                                                                                                                                                                                                                                                                                                                                   |
|                                 |                                                                                                                                                                                                                                                                                                                                                                                                                                                                                                                                                                                                                                                                                                                                                                                                                                                                                                                                                                                                                                                                                    |

SCHOLARONE™  
Manuscripts

1  
2  
3 **The INvolvement of breast CANcer patients during oncological consultations. A multi-centre**  
4 **randomized controlled trial. The INCA study protocol.**  
5  
6  
7  
8

9 Claudia Goss<sup>\*1</sup>, Alberto Ghilardi<sup>2</sup>, Giuseppe Deledda<sup>1</sup>, Chiara Buizza<sup>2</sup>, Alessandro Bottacini<sup>1</sup>, Lidia Del Piccolo<sup>1</sup>,  
10 Michela Rimondini<sup>1</sup>, Federica Chiodera<sup>1</sup>, Maria Angela Mazzi<sup>1</sup>, Mario Ballarin<sup>1</sup>, Irene Bighelli<sup>1</sup>, Maria Grazia  
11 Strepparava<sup>3</sup>, Annamaria Molino<sup>4</sup>, Elena Fiorio<sup>4</sup>, Rolando Nortilli<sup>5</sup>, Chiara Caliolio<sup>5</sup>, Serena Zuliani<sup>5</sup>, Alessandra  
12 Auremma<sup>5</sup>, Federica Maspero<sup>5</sup>, Edda Lucia Simoncini<sup>6</sup>, Fulvio Ragni<sup>7</sup>, Richard Brown<sup>8</sup>, Christa Zimmermann<sup>1</sup>  
13  
14  
15  
16  
17  
18

19 <sup>1</sup> Department of Public Health and Community Medicine, Section of Psychiatry and Clinical Psychology, University of Verona, Italy

20 <sup>2</sup> Department of Childcare and Biomedical Technologies, Section of Clinical and Dynamic Psychology, Faculty of Medicine and  
21 Surgery, University of Brescia, Italy  
22

23 <sup>3</sup> Department of Sperimental Medicine, Section of Clinical Psychology, Faculty of Medicine and Surgery, University of Milano-  
24 Bicocca, Italy  
25

26 <sup>4</sup> O.U. of Oncology d.O., Ospedale Civile Maggiore, Hospital Trust of Verona , Italy  
27

28 <sup>5</sup> O.U. of Oncology, Policlinico G. Rossi, Hospital Trust of Verona, Italy  
29

30 <sup>6</sup> Medical Oncology, Spedali Civili, Brescia, Italy  
31

32 <sup>7</sup> General Surgery 2, Spedali Civili, Brescia, Italy  
33

34 <sup>8</sup> Department of Social and Behavioral Health, School of Medicine, Virginia Commonwealth University, Richmond, VA, USA  
35  
36  
37

38 \*Corresponding author  
39

40 Department of Public Health and Community Medicine  
41

42 University of Verona  
43

44 Policlinico G.B. Rossi, P.le L.A. Scuro 10, 37134 Verona, Italy  
45

46 Tel +39 045 8124441  
47

48 Fax +39 045 8027498  
49

50 Email addresses: claudia.goss@univr.it  
51  
52

53 *Word count: 3946*  
54  
55  
56  
57

58 *Key- word:* patient involvement, breast cancer, doctor-patient communication  
59  
60

## ABSTRACT

**Introduction:** Studies on patient involvement show that physicians make few attempts to involve their patients who ask few questions if not facilitated. On the other hand, patients who participate in the decision making process show greater treatment adherence and have better health outcomes. Different methods to encourage the active participation have been described, however similar studies in Italy are lacking. The aims of the present study are: 1) assess the effects of a pre-consultation intervention to increase involvement of breast cancer patients, and 2) explore the role of the family member in the information exchange during the consultation.

**Methods and analysis:** All patients with breast cancer who attend the Oncology Out-patient Services for the first time will provide informed consent to participate in the study. They are randomly assigned to the intervention or to the control group.

The intervention consists of the presentation of a list of relevant illness-related questions, called a question prompt-sheet (QPS).

The main outcome measures of the efficacy of the intervention are: 1) the number of questions asked by patients during the consultation, 2) the involvement of the patient by the oncologist, 3) patient's perceived achievement of her information needs, and 4) the quality of the doctor-patient relationship in terms of patient-centeredness.

The hypotheses are: the intervention group will have increases in, the number of questions asked by the patient, his/her involvement in the information exchange and the decisional process, the perception that information needs have been met, and the patient-centeredness of the consultations

**Ethics and Dissemination:** The study was approved by the local Ethics Committee of the Hospital Trust of Verona. Study findings will be disseminated through peer-reviewed publications and conference presentations.

**Trial registration:** ClinicalTrials.gov identifier: NCT01510964

## ARTICLE SUMMARY

### Article focus

- Assess if a pre consultation intervention (QPS) facilitates greater participation of patients (and accompanying key persons when present) in the consultation process, by determining an increase in questioning and/or in the number of different illness related issues (e.g. diagnosis, treatment, prognosis) being discussed with the oncologist.
- Assess the effect of the QPS on the level of patient involvement by the oncologists, on patient satisfaction and coping, on the oncologist's perception of patient's preferred decisional role and to explore the role of key persons accompanying the patient.

### Key messages

- The involvement and participation of patients in therapeutic programs is of great interest not only to physicians but to all health professionals engaged in improving patients' adherence to treatment regimens or operating in the field of health promotion.
- We expect that patients who have the opportunity to rehearse their information needs before the consultation will ask a greater number of questions which in turn will determine their greater involvement by the physician and a greater number of satisfied needs.
- We also expect that the straightforward use of a list of printed questions of potential relevance for cancer patients and their companions at an early stage of illness, by modifying the process of information exchange, will increase their participation and satisfaction with the consultation, with potential benefits for treatment adherence and consequently treatment efficacy.

### Strengths and limitations of this study

- To our knowledge this is the first RCT in Europe which assesses the effects of QPS on cancer patients' involvement during the consultation, on their satisfaction and confidence in coping with illness, and which explores the role of the family member during the consultation.

- 1  
2  
3  
4  
5  
6  
7  
8  
9  
10  
11  
12  
13  
14  
15  
16  
17  
18  
19  
20  
21  
22  
23  
24  
25  
26  
27  
28  
29  
30  
31  
32  
33  
34  
35  
36  
37  
38  
39  
40  
41  
42  
43  
44  
45  
46  
47  
48  
49  
50  
51  
52  
53  
54  
55  
56  
57  
58  
59  
60
- QPS in this study is used before the consultation but it could be also brought into the consultation and discussed with the oncologist to further increase patient and companion participation

For peer review only

## INTRODUCTION

In recent years the interest in communication issues in cancer care has steadily increased, in particular regarding the information needs of oncology patients, the communication of bad news and their impact on the patient, and the development of guidelines on how to deliver bad news in a sensitive way.[1, 2]

The evidence indicates that patient's preferences for the type and amount of information vary. This requires physicians to adapt the information giving process to the needs and to the level of comprehension of the single patient. If the expression of such needs is not facilitated or encouraged, these needs tend to remain hidden, with the risk that the patient perceives the received information as either too much or too little. Good clinical practice entails the recognition of variations in patient's preferences, and helping patients accomplish these preferences. When we meet patient's information preferences, the patient is better able to handle the information in a way that fits him/her best, which is associated with better quality of care, coping with illness and treatment adherence.[3]

In the last decade, the focus of many studies has been directed towards activating patients to be more involved in their treatment.[4] How the physician conducts the interview and gives information[5] has a direct effect on the participation of the patient. It has been observed that what the physician says has an immediate effect on what the patients says and therefore can also influence the degree of patient participation in the consultation.[6, 7] To stimulate patients' participation in consultations, patients were encouraged by their doctor to ask questions or advised to prepare a list of questions,[8] or to select their questions from a printed list before the consultation (question prompt sheet-QPS).[4, 9-15] These tools were helpful both for patients and physicians, and improved patient participation during the consultation. Nevertheless there is a need to replicate these studies in different cultural contexts in order to test the feasibility of such aids and to support the findings.

1  
2  
3 In Italy, patients are frequently accompanied and assisted by a close family member or by another  
4 key person during the medical consultation. In this context the activation and involvement of the  
5 patient interacts with that of the key person and contributes to the communication dynamics of the  
6 consultation. Olhen and colleagues[16] explored the importance of significant others in therapeutic  
7 decisions and highlighted the notion of “relational autonomy”, which acknowledges that people  
8 are defined by their relationships and are dependent on others in making decisions.[17] Future  
9 research that analyses patients and companions as dyadic units would offer further insight into the  
10 impact of social relations on treatment decision-making processes. More evidence on the  
11 information needs of family members regarding the patient and their role in the information and  
12 decision processes during the consultation is also needed.  
13  
14  
15  
16  
17  
18  
19  
20  
21  
22  
23

24  
25 To our knowledge this is the first RCT in Europe which assesses the effects of a pre-consultation  
26 intervention (QPS) on cancer patients’ involvement during the consultation, on their satisfaction  
27 and confidence in coping with illness, and which explores the role of the family member during the  
28 consultation.  
29  
30  
31  
32  
33  
34  
35

### 36 **Study aims and hypotheses**

37  
38 The study pursues different aims. The main aim is to assess if a pre consultation intervention (QPS)  
39 facilitates greater participation of patients (and accompanying key persons when present) in the  
40 consultation process, by determining an increase in questioning and/or in the number of different  
41 illness related issues (e.g. diagnosis, treatment, prognosis) being discussed with the oncologist.  
42  
43  
44  
45  
46

47 Other aims are to assess the effect of the QPS on the level of patient involvement by the  
48 oncologists, on patient satisfaction and coping, on the oncologist’s perception of patient’s preferred  
49 decisional role and to explore the role of key persons accompanying the patient.  
50  
51  
52

53 In detail the study investigates if the intervention, determines:  
54

- 55 – a greater number of personal information needs expressed during the consultation (information  
56 needs expressed before the consultation correspond to those expressed during the consultation);  
57  
58  
59  
60

- 1
- 2
- 3 – the perception of a greater capacity to cope with illness and a greater satisfaction with decisions
- 4 made during the consultation;
- 5
- 6
- 7 – greater patient generated and/or doctor generated involvement of the patient;
- 8
- 9
- 10 – a better understanding of the received information and greater satisfaction;
- 11
- 12 – a different perception by the oncologist of patient’s preference regarding her participation in
- 13 therapeutic decisions;
- 14
- 15
- 16 – a different perception by the oncologist and by the patient of the doctor-patient relationship
- 17
- 18
- 19 – a more patient-centred approach during the consultation

20 The potential presence of a companion during the consultation allows us to explore if the “question  
21 prompt sheet” intervention (extended to the accompanying key person), changes the key person’s  
22 role and participation during the consultation.  
23  
24  
25  
26  
27  
28  
29  
30  
31

## 32 **METHODS AND ANALYSIS**

### 33 **Study design**

34  
35  
36 This is a multicentre, randomized controlled trial in which patients are attributed randomly to the  
37 intervention or to the control group on a 1:1 basis. Patients in the intervention group are given the  
38 QPS, a list of 50 specific questions (see below); and those in the control group are given a control  
39 sheet on which to write the questions they would like to ask. The oncologists are informed about the  
40 study protocol but are blinded to whether the patient is a participant of the control group or the  
41 intervention group. The oncologists perform their consultation as usual, according to the clinical  
42 practice of their centre. After concluding the consultation, they complete two questionnaires  
43 regarding the patient and the consultation.  
44  
45  
46  
47  
48  
49  
50  
51  
52  
53  
54

55 This protocol follows the CONSORT guidelines.[18]  
56  
57  
58  
59  
60



Standardized questionnaires are administered at baseline (before the randomization) and immediately after the consultation. (figure 1, table 1)

**Figure 1** INCA Study flow diagram

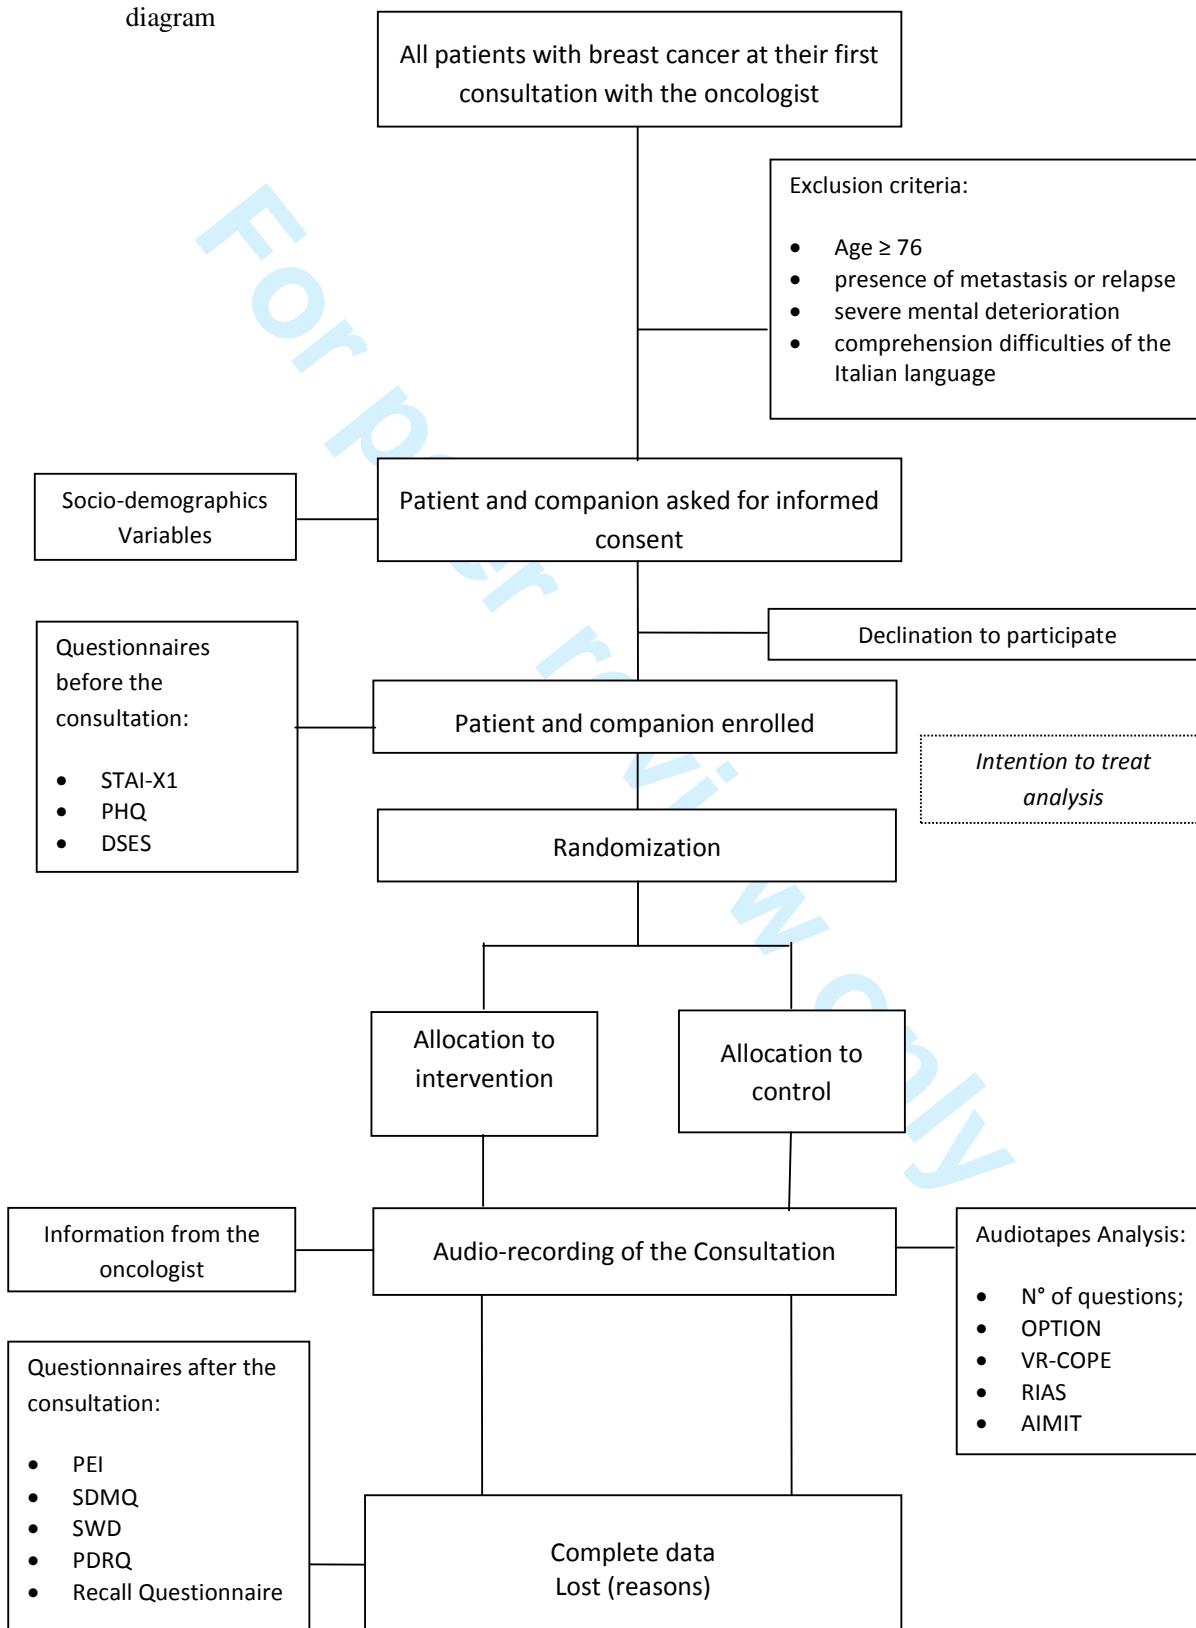

Table 1 Questionnaires and instruments used in the study

| Scale           | Evaluation                         | Explored area                                  | N° items  | Time                    |
|-----------------|------------------------------------|------------------------------------------------|-----------|-------------------------|
| STAI-X1         | Patient and companion              | State anxiety level                            | 20        | Before the consultation |
| PHQ-9           | Patient and companion              | Depression                                     | 9         | Before                  |
| GHQ-12          | Patient and companion              | Psychological distress                         | 12        | Before                  |
| DSES*           | Patient and companion              | Confidence with decision                       | 11        | Before                  |
| CPS             | Patient, companion and oncologists | Role in the decision making process            | vignettes | Before                  |
| EPQ-R           | Patient and companion              | Personality traits                             | 24        | Before                  |
| DP              | Oncologists                        | Oncologists' communication style               | 48        | One time only           |
| PEI             | Patient and companion              | Ability to cope with illness                   | 6         | After the consultation  |
| SDMQ*           | Patient and companion              | Patient involvement                            | 9         | After                   |
| SWD*            | Patient and companion              | Satisfaction with decision                     | 6         | After                   |
| PDRQ-9*         | Patient and companion              | Doctor-Patient relationship                    | 9         | After                   |
| RECALL*         | Patient and companion              | Recalling and understanding of information     | 10        | After                   |
| STAI-X1/R       | Patient and companion              | State anxiety level                            | 10        | After                   |
| DDPRQ-10        | Oncologists                        | Difficulties in relationship with the patient  | 12        | After                   |
| Audio-recording | Consultation                       | Interaction between doctor and patient         | -         | -                       |
| OPTION          | External rater                     | Involvement level                              | 12        | -                       |
| VR-COPE         | External rater                     | Aspects of patient-centred communication       | 9         | -                       |
| RIAS            | External rater                     | Verbal communication                           | 40        | -                       |
| AIMIT           | External rater                     | Activity of interpersonal motivational systems | -         | -                       |

\*Adapted version for companion

## Intervention

Patients and companions (if present) of both, intervention and control group, receive a form on which to write their reply to the following request: "Please indicate the arguments which you want to discuss today with your oncologist".

Patients and companions (if present) of the intervention group receive the QPS in addition to the form described above. An introduction explains the importance of asking questions during the consultations. The patient (and companion) is invited to select among a written list of about 50 possible questions those, if any, she would like to ask today to the oncologist. These questions have been chosen and adapted on the basis of previous studies in the field[2, 10-15] and are divided by topics. Questions regard diagnosis (e.g. "Of what type is my cancer?"), treatment (e.g. "Which are the pros and cons of the treatment?"), contribution of patient and lifestyle ("What can I do to improve the efficacy of treatment?"), prognosis ("What are the chances of relapse?") and other issues (e.g. "Do I need a referral from my GP for the next visit?").

## Setting

Patients are being recruited from three Oncology Departments in Northern Italy: two run by Hospital Trust of Verona in the Veneto region (placed in two different part of the city) and one by the Hospital Trust of Brescia, in the Lombardia region.

The population of Verona city and its province in 2010 is about 914 382, the population of Brescia city and its province about 1 242 923.[19] In the Veneto region the estimation of incidence of breast cancer in 2010 was 4 424 new cases per year (Standardized rate adjusted for age using the European population as standard (std) per 100,000= 133). In the Lombardia region the estimation of incidence of breast cancer in 2010 was 7 456 new cases per year (std = 109).[20]

The three Oncology departments have an out-patient clinic dedicated to breast cancer patients with a rotation of 2-5 oncologists.

1  
2  
3 Visits are scheduled on fixed day with a number of 4 - 8 patients per day. Patients have already  
4 been diagnosed with cancer, have already been visited by the surgeon and undergone the breast  
5 operation (e.g. lumpectomy). Generally in the first visit with the oncologist the histological results  
6 are communicated and further medical treatment is decided (e.g chemotherapy, hormone therapy).  
7  
8  
9  
10  
11  
12 The length of the visit can vary from 30 to 60 minutes.

### 16 **Sample and recruitment**

17  
18 The study sample will be composed of all consecutive patients between the age of 18 to 75 years  
19 who attend the Oncology out-patient clinics of the participating centres and who have a recent  
20 diagnosis of breast cancer at an early stage. Exclusion criteria are the presence of metastasis or  
21 relapse, severe mental deterioration, comprehension difficulties of the Italian language.  
22  
23  
24  
25  
26  
27  
28

### 29 **Procedure**

30  
31 Before the recruitment phase the oncologists were informed about the study and asked to  
32 participate, giving a written informed consent.  
33  
34  
35

36 All breast cancer patients at their first out-patient visit with the oncologist of the Clinical Oncology  
37 Department (and their companions if present), are being asked by a project member to give written  
38 informed consent to participate in the study (figure 1).  
39  
40  
41

42 Consenting patients and companions receive an envelope containing six questionnaires to answer  
43 before the consultation (baseline assessment) (table 1). The project staff member (MAM) then  
44 randomly allocates consenting patients and their companions to the intervention or control group  
45 (see also paragraph "Randomization"). Another project staff member (AB, CB, IB or FC) hands out  
46 the envelopes with either the intervention prompt sheet or the control sheet and collect the sheets  
47 after their completion. The subsequent consultation is audio recorded. After the consultation,  
48 patients and their companions complete six other questionnaires, with assistance from the project  
49 member (AB, CB, IB or FC).  
50  
51  
52  
53  
54  
55  
56  
57  
58  
59  
60

1  
2  
3 The oncologists reports on a form, the cancer stage and type, when and by whom the patient was  
4 informed about diagnosis, and the therapeutic options appropriate for this patient. They also  
5 complete a questionnaire measuring the perception of the patient as difficult.  
6  
7

8  
9 The audio tapes and oncologist' forms are collected by the project staff. The audio tapes are  
10 examined for the content and number of questions asked by patients and companions, and are rated  
11 applying the OPTION scale,[21-23] which measures the extent to which the oncologist has  
12 succeeded to involve the patient in the consultation. The questions that emerge during the  
13 consultations are compared with those expressed before the visit. The audio recorded consultations  
14 are also analyzed with the Roter Interaction Analysis System (RIAS),[24, 25] a system for coding  
15 doctor-patient communication, with the VR-COPE[26] and with the Assessment of Interpersonal  
16 Motivation in Transcripts (AIMIT),[27] for the evaluation of five different motivational systems  
17 guiding the verbal and non verbal behaviours during interactions.  
18  
19  
20  
21  
22  
23  
24  
25  
26  
27  
28  
29  
30  
31

### 32 **Randomization**

33  
34 The randomization sequence is being conducted off-site using the “random allocation of treatments  
35 balanced in blocks (ralloc)” package for Stata[28] and is stratified by centre with a 1:1 allocation  
36 ratio of treatment. Block randomization (size 4) is used to minimize large imbalances between the  
37 intervention groups. The allocation sequences are generated by an independent individual, are  
38 stored in computer files and remain unknown to the researchers until the patient is randomized.  
39  
40  
41  
42  
43  
44

45 The QPS or the control sheet, chosen for the two arms of trial, are placed in opaque envelopes,  
46 sealed and numbered in sequence (following the list generated by the randomization procedure) by  
47 a staff member of each centre (MAM and CB), not involved in the data collection phase. Both  
48 randomization procedure and treatment allocation have been developed to fully conceal treatment  
49 allocation.[18, 29]  
50  
51  
52  
53  
54

55  
56 Patients and oncologists are unaware of the allocation. The raters who analyze the audio- recordings  
57 are also blinded to the allocation of patients.  
58  
59  
60

## Study measures

### Socio demographic and clinical data

Patients' socio demographic data are: age, education, family status and employment status and are reported by patients and companions during the baseline assessment.

Oncologists' socio demographic data are: age, gender and years of experience. Data for oncology resident (when present during the consultation) is also obtained.

Clinical data are: cancer stage and type, duration of illness (who has informed patient on diagnosis and when), therapeutic options considered appropriate for this patient, all reported on a form by the oncologist.

### Primary outcome measure

- The total number of patient's questions during the consultation regarding diagnosis, prognosis, treatment, lifestyle and other issues. Question asking is considered an index of patient's participation during the consultation. The QPS aims to increase the number of question by giving the opportunity to patients and companions to reflect on their informative needs choosing among a wide range of possible questions those ones perceived as most relevant in view of the subsequent consultation.

### Secondary outcome measures

- The number of unmet informative needs that emerge during the consultation. This measure is obtained by comparing the number of questions indicated by patients and their companion before the consultation (i.e., those selected in the QPS by patient) with those actually raised during the consultation (i.e., those identified subsequent to listening to the audio-recordings).

- 1  
2  
3  
4  
5  
6  
7  
8  
9  
10  
11  
12  
13  
14  
15  
16  
17  
18  
19  
20  
21  
22  
23  
24  
25  
26  
27  
28  
29  
30  
31  
32  
33  
34  
35  
36  
37  
38  
39  
40  
41  
42  
43  
44  
45  
46  
47  
48  
49  
50  
51  
52  
53  
54  
55  
56  
57  
58  
59  
60
- Ability to cope with the illness, measured with the Patient Enablement Instrument (PEI). This questionnaire is a self-administered questionnaire of six items on a Likert scale from 0 (same or less) to 2 (much better, much more).[30]
  - Patient involvement, measured with the Shared Decision Making Questionnaire (SDM-Q) and the OPTION Scale. The SDM-Q is a self administered questionnaire of 9 items on a Likert scale from 1 (completely disagree) to 6 (agree completely) and assesses patients' perception of the decisional process and their level of involvement during the consultation, the information received on therapeutic options, the potential risks and benefits regarding the participation at the decisional process.[31, 32] The OPTION Scale is composed of 12 items of operational definitions of different patient involving skills, rated on a Likert scale from 0 (behaviour absent) to 4 (behaviour observed at an excellent skill level).[21-23] The scale is applied by trained raters to the audio recording of the consultation. In summary, it examines whether problems are well defined, whether options are formulated, information provided, patient understanding and role preference evaluated, and decisions examined from both the professional and patient perspective. The total score ranges from 0 (0 in all items) to 48 (4 in all items) and is transformed into a 0 -100 score.
  - Satisfaction with decisions made during the consultation, measured with the Satisfaction with Decision Scale (SWD).This is a self administered questionnaire of 6 items on a Likert scale from 0 (completely disagree) to 5 (agree completely).[33]
  - Recalling and understanding of information, measured with the Recall Questionnaire. This questionnaire consists of six questions which ask the patient to recall the received information on treatment decisions and pathology (e.g. "What was the treatment decision? Which treatment options were discussed?"). The questions have been prepared for the present study with reference to previous studies.[11, 34, 35] The questionnaire allows with the help of the audio recorded consultation to evaluate patient's correct recall and understanding by comparing patients' reports with what was actually discussed during the consultation. We added three other

1  
2  
3 questions, rated on a 0 (no at all) to 5 (very much) likert scale asking whether the patient  
4 succeeded in their purpose of question asking, whether the oncologist answered the questions  
5 properly and how much more information she would have needed.  
6  
7

- 8  
9  
10 – Overall consultation atmosphere, is measured with the Roter Interaction Analysis System  
11 (RIAS),[24, 25] and the Assessment of Interpersonal Motivation in Transcripts (AIMIT).[27]  
12 VR-COPE,[26] assesses the content, the process and relational aspects of patient-centred  
13 communication during medical consultations on the basis of a multidimensional evaluation and  
14 comprises nine items. Each item is defined by operational definitions and rated on a 0-10 point  
15 scale. The scale is applied by trained raters on the audio-recording of the consultation. RIAS is a  
16 coding system of medical consultations, composed by 40 categories describing task-oriented  
17 and emotion oriented interactions between doctors and patients. The system will be applied on  
18 the consultation audio-recording by trained raters.[24, 25] AIMIT[27] is a coding system to  
19 assess in the therapeutic dialogue the activity of interpersonal motivational systems that guide  
20 the verbal and non verbal behaviours during interactions (attachment, caring, competition,  
21 cooperation, seduction) .  
22  
23 – Perceived Patient-doctor relationship, measured with the Patient – Doctor Relationship  
24 Questionnaire (PDRQ-9) and the Difficult Doctor Patient Relationship Questionnaire (DDPRQ-  
25 10). PDRQ-9 is a self-administered questionnaire of 9 items on a Likert scale from 1 (not at all  
26 appropriate) to 5 (totally appropriate), to measure the relationship between the doctor and the  
27 patient, from a patient point of view.[36] The DDPRQ-10 (is a self-report instrument of 10  
28 items on a Likert scale from 1 (not at all) to 6 (a great deal), is completed by physicians after the  
29 encounter with a patient.[37, 38] The questionnaire identifies the patients experienced as  
30 difficult patients. We added four more items for rating anxiety, depression, and psychological  
31 distress of the patient and the difficulty experienced by the oncologist in answering the  
32 questions asked.  
33  
34  
35  
36  
37  
38  
39  
40  
41  
42  
43  
44  
45  
46  
47  
48  
49  
50  
51  
52  
53  
54  
55  
56  
57  
58  
59  
60



- Perceived role preference of the patient, measured with the Control Preference Scale (CPS, Oncologist version).[39, 40] This scale assesses how the oncologist perceives the role that patient might prefer regarding the decision making process
- Duration of the consultation, measured in minutes.

### **Process related and potential confounding variables**

- Anxiety, depression and general well being, measured with the State Anxiety Inventory (STAI-X1, XR),[41-43] the Patient Health Questionnaire depression scale (PHQ-9)[44-46] and the General Health Questionnaire (GHQ-12).[47]  
STAI-X1 is a self-administered questionnaire of 20 items on a Likert scale from 1 (not at all) to 4 (very much) completed before the consultation. Higher total scores indicate greater state anxiety. The STAI-X1R, administered after the consultation, is a shorter version of ten out of the twenty items of the STAI-X1, and it is used to evaluate the state anxiety level at the end of the test and to compare this level with the one measured at the beginning. The score of this scale is used also to compute the difference between the level of state anxiety at the beginning and at the end of the questionnaire (STAI-DIFF), and the level of coherence in the change between the two administrations of the STAI-X1 (STAI-ACC).
- PHQ-9 is a self-assessment questionnaire for detecting the presence of depression and consists of 9 items with response options of 0 (not at all) to 3 (almost every day), and has a summative score range of 0 to 27. We score it in the standard way, using the sum of the 0–3 scores for each item, and  $\geq 8$  as a cut-score for possible cases of depression.[44-46]
- GHQ-12 is a self administrated questionnaire of 12 items and has a summative score range of 0 to 12 and a cut-score of  $>3$  indicating psychological distress.[47]
- Personality traits, measured with the Eysenck Personality Questionnaire (EPQR-S).[48] The EPQR-S is a self-administered questionnaire of 48 items on yes/no scale. For our study we use two subscales: the Extraversion/Introversion (12 items) and Neuroticism/Stability (12 items).

1  
2  
3 The “Extroversion” is characterized by being outgoing, talkative, high on positive affect (feeling  
4 good) and in need of external stimulation. The “Neuroticism” or emotionality is characterized  
5 by high levels of negative affect such as depression and anxiety.  
6  
7

- 8  
9  
10 – Confidence with decision, measured with the Decision Self Efficacy Scale (DSES).[49] This  
11 self- administered questionnaire for patients consists of 11 items on a Likert scale from 0 ( not  
12 at all confident) to 4 (very confident).  
13  
14  
15  
16 – Patients’ and their companion’s preference for the role they want to have in the decision making  
17 process, measured with the Control Preference Scale (CPS).[39, 40] This self-administered  
18 instrument contains 5 vignettes with text, depicting different patient roles (from active to  
19 passive) from which patients choose the one considered as most appropriate for them.  
20  
21  
22  
23 – Patient-centred communication style and attitude toward the doctor-patient relationship,  
24 measured with the Doctor-Patient (DP) Scale.[50] The Scale measures the degree of  
25 oncologists’ self reported patient or doctor-centred communication style and attitude. It consists  
26 of 48 statements to rate on a Likert scale from 1 (strong agreement) to 5 (strong disagreement).  
27  
28  
29  
30  
31  
32  
33  
34  
35  
36  
37  
38  
39  
40  
41  
42  
43  
44  
45  
46  
47  
48  
49  
50  
51  
52  
53  
54  
55  
56  
57  
58  
59  
60
- It has a summative score range of 48 to 240. The scale is completed by all oncologists who join the study.

### Sample size calculation

A sample of 300 patients will be recruited. This number has been estimated to account for approximately a 15% of withdrawal rate, so that 250-260 patients will complete the study, with about 130 patients in each arm. The primary outcome measure is the number of patient questions. The international literature reports a mean number of nine questions (range 0-53) for breast cancer patients. Since such data are not available in the Italian context, an observational phase was conducted. We recruited a sample of 30 patients (10 for each centre) with the same characteristics, in order to assess the number and type of questions asked by the patient during the consultation, to understand the ongoing interaction between oncologists and patients in a first encounter and to test

1  
2  
3 the feasibility of procedures and questionnaires. This observational study resulted in a mean number  
4  
5 of 18 (sd=13) patient questions asked during a first encounter with the oncologist. An intervention  
6  
7 intended to increase the number of questions might be considered efficacious with an increase of  
8  
9 30%. The sample size required to evidence such difference was calculated using the sampsi  
10  
11 command of Stata 11,[51] assuming a power of 80% and a two-sided significant level of 5% on a  
12  
13 student t-test for differences between independent groups.[52, 53]  
14  
15

### 16 17 18 **Statistical analysis** 19

20 The data will be analyzed according to intention-to-treat principle.[54] Standard statistical  
21  
22 techniques will be used to describe characteristics of patients in both groups, and CONSORT flow  
23  
24 diagram will be shown in order to explain the phases of trial and inform on the findings  
25  
26 confidence.[18] The primary outcome, significant increase of patient questions, will be compared in  
27  
28 the two arms using t-test. If adjustment for possible baseline differences among patients (as well as  
29  
30 for oncologists and centres) is needed, an analysis of covariance will be done. Regarding secondary  
31  
32 outcome measures, multilevel analyses will be used to taking into account the specific effect of the  
33  
34 individual oncologist.[55] Regarding the analyses of the audio-recordings, additional techniques to  
35  
36 study the doctor patient interaction at a micro level will be used, such as sequence analyses which  
37  
38 study the probabilistic links between subsequent physician and patient turns.[8, 56, 57]  
39  
40  
41  
42  
43  
44  
45  
46  
47  
48  
49  
50  
51  
52  
53  
54  
55  
56  
57  
58  
59  
60

## EXPECTED ACHIEVEMENT

The involvement and participation of patients in therapeutic programs is of great interest not only to physicians but to all health professionals engaged in improving patients' adherence to treatment regimens or operating in the field of health promotion.

We expect that patients who have the opportunity to rehearse their information needs before the consultation will ask a greater number of questions which in turn will determine their greater involvement by the physician and a greater number of satisfied needs. We also expect that the straightforward use of a list of printed questions of potential relevance for cancer patients and their companions at an early stage of illness, by modifying the process of information exchange, will increase their participation and satisfaction with the consultation, with potential benefits for treatment adherence and consequently treatment efficacy. The use of a question prompt sheet might be a simple and quick device in improving the overall communication between oncologist and patient. It might be routinely used before the consultation and also brought into the consultation and discussed with the oncologist to further increase patient and companion participation. Evidence demonstrates that efficacious communication positively influences the understanding and satisfaction of the patient, treatment adherence and health status. Moreover, the oncologist's knowledge and consideration of the information needs of the family members or other key persons close to the patient who in Italy often accompany the patient may further facilitate patient's participation in the therapeutic program.

## ETHICS AND DISSEMINATION PLANS

The study was approved by the local Ethics Committees of the Hospital Trust of Verona. The study is registered at ClinicalTrials.gov (identifier: NCT01510964). This protocol follows the CONSORT guidelines.[18]

Recruitment phase started in June 2011 and will continue till the enrolment will be completed and is expected to be closed in December 2012. Analysis will start after data monitoring and checking is

1  
2  
3 completed. The dissemination of the trial findings will principally be carried out through  
4  
5 publications in peer-review journal and presentations at national/international conferences focused  
6  
7 on cancer and/or communication, for examples European Association for Communication in Health  
8  
9 Care Conferences and International Shared Decision Making Conferences.  
10

#### 11 12 13 **FUNDING**

14  
15  
16 This research received no specific grant from any funding agency in the public, commercial or not-  
17  
18 for-profit sectors.  
19

#### 20 21 22 **COMPETING INTERESTS**

23  
24  
25 The authors declared that they have no competing interest.  
26  
27

#### 28 29 30 **AUTHORS' CONTRIBUTIONS**

31  
32 CG, LDP, MR, CZ developed the study protocol and together with AG and MGS supervised the all  
33  
34 procedures. MAM is the trial statistician and is responsible for generating the randomization  
35  
36 sequences and providing guidance on statistical analysis of trial data. MB is the computer scientist  
37  
38 that developed the database to save the data. CG drafted the manuscript, will oversee enrolment and  
39  
40 data collection. GD, AB, FC, CB, IB, AM, EF, RN, CC, SZ, AA, FM, ELS, FR participated in  
41  
42 enrolling the patients. All authors saw and approved the final version of the manuscript.  
43  
44  
45  
46  
47  
48  
49  
50  
51  
52  
53  
54  
55  
56  
57  
58  
59  
60

## REFERENCES

1. Buckman R. Breaking. Bad news: a guide for healthcare professionals. Baltimore, MD: Jhon Hopkins University Press 1992.
2. Baile WF, Buckman R, Lenzi R, et al. AP. SPIKES - A six-step protocol for delivering bad news: Application to the patient with cancer. *Oncologist* 2000;**5**:302-311.
3. Joosten EAG, DeFuentes-Merilla L, de Weert GH, Sensky T, et al. Systematic review of the effects of shared decision making on patient satisfaction, treatment adherence and health status. *Psychother Psychosom* 2008;**77**:219-226.
4. Clayton JM, Butow PN, Tattersall MH, et al. Randomized controlled trial of a prompt list to help advanced cancer patients and their caregivers to ask questions about prognosis and end-of-life care. *J Clin Oncol* 2007;**25**:715-723.
5. Charles C, Gafni A, Whelan T. How to improve communication between doctors and patients. Learning more about the decision making context is important. *BMJ* 2000;**320**:1220-1221.
6. Drew P, Chatwin J, Collins S. Conversation analysis: a method for research into interactions between patients and health-care professionals. *Health Expectat* 2001;**4**:58-70.
7. Zimmermann C, Del Piccolo L, Mazzi MA. Patient cues and medical interviewing in general practice. Examples of the application of sequential analysis. *Epidemiol Psichiatr Soc* 2003;**12**:115-123.
8. Kidd J, Marteau TM, Robinson S, et al. Promoting patient participation in consultations: a randomized controlled trial to evaluate the effectiveness of three patient-focused interventions. *Patient Educ Couns* 2004;**52**:107-12.
9. Butow PN, Dunn SM, Tattersall MHN, et al. Patient participation in the cancer consultation: evaluation of a question prompt sheet. *Ann Oncol* 1994;**5**:199-204.

10. Brown R, Butow PN, Boyer MJ, et al. Promoting patient participation in the cancer consultation: evaluation of a prompt sheet and coaching in question-asking. *Br J Cancer* 1999;**80**:242-248.
11. Brown RF, Butow PN, Dunn SM, et al. Promoting patient participation and shortening cancer consultations: a randomised trial. *Br J Cancer* 2001;**8**:1273-1279.
12. Bruera E, Sweeney C, Willey J, et al. Breast cancer patient perception of the helpfulness of a prompt sheet versus a general information sheet during outpatient consultation: a randomized controlled trial. *J Pain Symptom Manage* 2003;**5**:412-419.
13. Glynne-Jones R, Ostler P, Lumley-Graybow S, et al. Can I look at my list? An evaluation of a 'prompt sheet' within an oncology outpatient clinic. *Clin Oncol* 2006;**18**:395-400.
14. Clayton J, Butow P, Tattersall M, et al. Asking questions can help: development and preliminary evaluation of a question prompt list for palliative care patients. *Br J Cancer* 2003;**89**:2069-2077.
15. Clayton JM, Butow PN, Tattersall MH, et al. Randomized controlled trial of a prompt list to help advanced cancer patients and their caregivers to ask questions about prognosis and end-of-life care. *J Clin Oncol* 2007;**25**:715-723.
16. Ohlen J, Balneaves L, Bottorff J, et al. The influence of significant others in complementary and alternative medicine decisions by cancer patients. *Soc Sci Med* 2006;**63**:1625-1636.
17. Christman J. Relational autonomy, liberal individualism, and the social constitution of selves. *Philosophical Studies* 2004;**117**:143-164.
18. Moher D, Hopewell S, Schulz KF, et al. CONSORT 2010 explanation and elaboration: updated guidelines for reporting parallel group randomized trials. *BMJ* 2010;**340**:c869. DOI: 10.1136/bmj.c869.
19. Istituto Nazionale di Statistica (ISTAT) Web site.  
<http://www.demo.istat.it/pop2010/index.html>. Accessed October 24, 2012.

- 1
- 2
- 3 20. Centro Nazionale di Epidemiologia, Sorveglianza e Promozione della Salute - Istituto
- 4
- 5 Superiore di Sanità (ISS) Web site. [http://www.tumori.net/it3/banca\\_dati/query.php](http://www.tumori.net/it3/banca_dati/query.php). Accessed
- 6
- 7 October 24, 2012.
- 8
- 9
- 10 21. Elwyn G, Hutchings H, Edwards A, et al. The OPTION scale: measuring the extent that
- 11
- 12 clinicians involve patients in decision-making tasks. *Health Expectat* 2005;**8**:34-42.
- 13
- 14 22. Goss C, Fontanesi S, Mazzi MA, et al. The assessment of patient involvement across
- 15
- 16 consultation. The Italian version of the OPTION scale (in Italian). *Epidemiol Psichiatr Soc*
- 17
- 18 2007;**16**:339-349.
- 19
- 20
- 21 23. Goss C, Fontanesi S, Mazzi MA, et al. Shared decision making: the reliability of the OPTION
- 22
- 23 scale in Italy. *Pat Educ Counsel* 2007;**66**:296-302.
- 24
- 25 24. Roter D, Larson S. The Roter interaction analysis system (RIAS): utility and flexibility for
- 26
- 27 analysis of medical interactions. *Pat Educ Counsel* 2002;**26**:243-251.
- 28
- 29
- 30 25. Roter D. The Roter method of interaction process analysis. RIAS manual. Baltimore, MD:
- 31
- 32 John Hopkins University Press 1991.
- 33
- 34 26. Del Piccolo L, Mazzi MA, Scardoni S, et al. A theory based proposal to evaluate patient-
- 35
- 36 centred communication in medical consultations: the Verona Patient-centred Communication
- 37
- 38 Evaluation scale (VR-COPE). *Health Education* 2008;**108**:355-372.
- 39
- 40
- 41 27. Ardovini C, Cotugno A, Costantini E, et al. Il manuale AIMIT. Analisi degli Indicatori delle
- 42
- 43 Motivazioni Interpersonali nei Trascritti. In: Liotti G, Monticelli F. I sistemi motivazionali nel
- 44
- 45 dialogo clinico. Il manuale AIMIT. Milano, IT: Raffaello Cortina editore 2008.
- 46
- 47
- 48 28. Ryan P. sxd1 4: Random allocation of treatments in blocks. *Stata Journal* 2008;**8**:146.
- 49
- 50 29. Altman DG, Schulz KF, Moher D, et al. The revised CONSORT statement for reporting
- 51
- 52 randomized trials: explanation and elaboration. *Ann Intern Med* 2001;**134**:663-94.
- 53
- 54 30. Howie JG, Heaney DJ, Maxwell M, et al. A comparison of a Patient Enablement Instrument
- 55
- 56 (PEI) against two established satisfaction scales as an outcome measure of primary care
- 57
- 58 consultations. *Fam Pract* 1998;**15**:165-171.
- 59
- 60



- 1  
2  
3 31. Simon D, Chorr G, Wirtz M, et al. Development and first validation of the shared decision  
4 making questionnaire (SDM-Q). *Pat Educ Counsel* 2006;**63**:319-327.
- 5  
6  
7 32. Kriston L, Scholl I, Hölzel L, et al. The 9-item Shared Decision Making Questionnaire (SDM-  
8 Q-9). Development and psychometric properties in a primary care sample. *Patient Educ*  
9 *Couns.* 2010;**80**:94-9.
- 10  
11  
12 33. Holmes-Rovner M, Kroll J, Schmitt N, et al. Patient satisfaction with health care decisions:  
13 the Satisfaction with Decision Scale. *Med Decis Making* 1996;**16**:58-64.
- 14  
15  
16 34. Gattellari M, Voigt KJ, Butow PN, et al. When the treatment goal is not cure: are cancer  
17 patients equipped to make informed decisions? *J Clin Oncol* 2002;**20**:503-513.
- 18  
19  
20 35. Whelan T, Levine M, Gafni A, et al. Mastectomy or lumpectomy? Helping women make  
21 informed choices. *J Clin Oncol* 1999;**17**:1727-1735.
- 22  
23  
24 36. Van der Feltz-Cornelis CM, Van Oppen P, Van Marwijk HWJ, et al. A patient-doctor  
25 relationship questionnaire (PDRQ-9) in primary care: development and psychometric  
26 evaluation. *Gen Hospit Psychiatry* 2004;**26**:115-120.
- 27  
28  
29 37. Hahn SR, Thompson KS, Wills TA, et al. The difficult doctor-patient relationship:  
30 somatization, personality and psychopathology. *J Clin Epidemiol* 1994;**47**:647-57.
- 31  
32  
33 38. Hahn SR, Kroenke K, Spitzer RL, et al. The difficult patient: prevalence, psychopathology,  
34 and functional impairment. *J Gen Intern Med* 1996;**11**:1-8.
- 35  
36  
37 39. Degner LF, Sloan JA, Venkatesh P. The Control Preferences Scale. *Can J Nurs Res*  
38 1997;**29**:21-43.
- 39  
40  
41 40. Giordano A, Mattarozzi K, Pucci E, et al. Participation in medical decision-making: attitudes  
42 of Italians with multiple sclerosis. *J Neurol Sci* 2008;**275**:86-91.
- 43  
44  
45 41. Spielberger CD. Anxiety as an emotional state. (Vol. 1). New York: Academic Press 1972.
- 46  
47  
48 42. Spielberger CD, Gorsuch RL, Lushene R, et al. Manual for the State-Trait Anxiety Inventory.  
49 Palo Alto, CA: Consulting Psychologists Press 1983.
- 50  
51  
52  
53  
54  
55  
56  
57  
58  
59  
60

- 1  
2  
3 43. Lazzari R, Pancheri P. S.T.A.I. Questionario di autovalutazione dell'ansia di stato e di tratto.  
4  
5 Firenze, IT: Organizzazioni Speciali 1980.  
6  
7 44. Kroenke K, Spitzer RL, Williams JB. The PHQ-9: validity of a brief depression severity  
8  
9 measure. *J Gen Intern Med* 2001;**16**:606-13.  
10  
11 45. Kroenke K, Streine TW, Spitzer RL, et al. The PHQ-8 as a measure of current depression in  
12  
13 general population. *J Affect Disord* 2009;**114**:163-173.  
14  
15 46. Thekkumpurath P, Walker J, Butcher I, et al. Screening for major depression in cancer  
16  
17 outpatients: the diagnostic accuracy of the 9-item patient health questionnaire. *Cancer*  
18  
19 2011;**117**:218-227.  
20  
21 47. Politi PL, Piccinelli M, Wilkinson G. Reliability, validity and factor structure of the 12-item  
22  
23 General Health Questionnaire among young males in Italy. *Acta Psychiatr Scand*  
24  
25 1994;**90**:432-437.  
26  
27 48. Eysenck SBG, Eysenck HJ, Barrett P. A revised version of the psychoticism scale.  
28  
29 *Personality and Individual Differences* 1985;**6**:21-29.  
30  
31 49. O'Connor AM. User Manual-Decision Self-Efficacy Scale. Patient Decision Aids, Ottawa  
32  
33 Hospital Research Institute (OHIR) Web site.  
34  
35 [http://decisionaid.ohri.ca/docs/develop/User\\_Manuals/UM\\_Decision\\_SelfEfficacy.pdf](http://decisionaid.ohri.ca/docs/develop/User_Manuals/UM_Decision_SelfEfficacy.pdf).  
36  
37 Accessed October 24, 2012.  
38  
39 50. De Monchy C, Richardson R, Brown RA, et al. Measuring attitudes of doctors: the doctor-  
40  
41 patient (DP) rating. *Med Educ* 1988;**22**:231-239.  
42  
43 51. StataCorp. Stata Statistical Software: Release 11.2. College Station, TX: StataCorp LP 2011.  
44  
45 52. Pocock SJ. Clinical trials: A practical approach. New York: John Wiley & Sons 1983.  
46  
47 53. Sullivan LM, D'Agostino RB. Robustness and power of analysis of covariance applied to  
48  
49 ordinal scaled data as arising in randomized controlled trials. *Stat Med* 2003;**22**:1317-1334  
50  
51 54. Little R, Yau L. Intent-to-treat analysis for longitudinal studies with drop-outs. *Biometrics*  
52  
53 1996;**52**:1324-1333.  
54  
55  
56  
57  
58  
59  
60

- 1  
2  
3 55. Skrondal A, Rabe-Hesketh S. Generalized latent variable modelling: Multilevel, longitudinal,  
4 and structural equation models. New York: Chapman & Hall/CRC 2004.  
5  
6  
7 56. Mazzi MA, Del Piccolo L, Zimmermann C. Event-based categorical sequential analyses of  
8 the medical interview: a review. *Epidemiol Psychiatr Soc* 2003;**12**:81-85.  
9  
10  
11 57. Goss C, Mazzi MA, Del Piccolo L, et al. Information-giving sequences in general practice  
12 consultations. *J Eval Clin Pract* 2005;**11**:339-349.  
13  
14  
15  
16  
17  
18  
19  
20  
21  
22  
23  
24  
25  
26  
27  
28  
29  
30  
31  
32  
33  
34  
35  
36  
37  
38  
39  
40  
41  
42  
43  
44  
45  
46  
47  
48  
49  
50  
51  
52  
53  
54  
55  
56  
57  
58  
59  
60



**The INvolvement of breast CANcer patients during  
oncological consultations. A multi-centre randomized  
controlled trial. The INCA study protocol.**

|                                    |                                                                                                                                                                                                                                                                                                                                                                                                                                                                                                                                                                                                                                                                                                                                                                                                                                                                                                                                                                                                                                                                                    |
|------------------------------------|------------------------------------------------------------------------------------------------------------------------------------------------------------------------------------------------------------------------------------------------------------------------------------------------------------------------------------------------------------------------------------------------------------------------------------------------------------------------------------------------------------------------------------------------------------------------------------------------------------------------------------------------------------------------------------------------------------------------------------------------------------------------------------------------------------------------------------------------------------------------------------------------------------------------------------------------------------------------------------------------------------------------------------------------------------------------------------|
| Journal:                           | <i>BMJ Open</i>                                                                                                                                                                                                                                                                                                                                                                                                                                                                                                                                                                                                                                                                                                                                                                                                                                                                                                                                                                                                                                                                    |
| Manuscript ID:                     | bmjopen-2012-002266.R1                                                                                                                                                                                                                                                                                                                                                                                                                                                                                                                                                                                                                                                                                                                                                                                                                                                                                                                                                                                                                                                             |
| Article Type:                      | Protocol                                                                                                                                                                                                                                                                                                                                                                                                                                                                                                                                                                                                                                                                                                                                                                                                                                                                                                                                                                                                                                                                           |
| Date Submitted by the Author:      | 16-Jan-2013                                                                                                                                                                                                                                                                                                                                                                                                                                                                                                                                                                                                                                                                                                                                                                                                                                                                                                                                                                                                                                                                        |
| Complete List of Authors:          | Goss, Claudia; University of Verona<br>Ghilardi, Alberto; University of Brescia,<br>Deledda, giuseppe; University of Verona,<br>Buizza, Chiara; University of Brescia,<br>Bottacini, Alessandro; University of Verona,<br>Del Piccolo, Lidia; University of Verona,<br>Rimondini, Michela; University of Verona,<br>Chiodera, Federica; University of Verona,<br>Mazzi, Maria Angela; University of Verona,<br>Ballarin, Mario; University of Verona,<br>Bighelli, Irene; University of Verona,<br>Strepparava, Maria Grazia; University of Milano-Bicocca,<br>Molino, Annamaria; Hospital Trust, Verona,<br>Fiorio, Elena; Hospital Trust, Verona,<br>Nortilli, Rolando; Hospital Trust, Verona,<br>Caliolo, Chiara; Hospital Trust, Verona,<br>Zuliani, Serena; Hospital Trust, Verona,<br>Auriemma, Alessandra; Hospital Trust, Verona,<br>Maspero, Federica; Hospital Trust, Verona,<br>Simoncini, Edda; Spedali Civili, Brescia,<br>Ragni, Fulvio; Spedali Civili, Brescia,<br>Brown, Richard; Vrginia Commonwealth University,<br>Zimmermann, Christa; University of Verona, |
| <b>Primary Subject<br>Heading</b>: | Oncology                                                                                                                                                                                                                                                                                                                                                                                                                                                                                                                                                                                                                                                                                                                                                                                                                                                                                                                                                                                                                                                                           |
| Secondary Subject Heading:         | Patient-centred medicine                                                                                                                                                                                                                                                                                                                                                                                                                                                                                                                                                                                                                                                                                                                                                                                                                                                                                                                                                                                                                                                           |
| Keywords:                          | patient involvement, breast cancer, docotr-pateint communication                                                                                                                                                                                                                                                                                                                                                                                                                                                                                                                                                                                                                                                                                                                                                                                                                                                                                                                                                                                                                   |
|                                    |                                                                                                                                                                                                                                                                                                                                                                                                                                                                                                                                                                                                                                                                                                                                                                                                                                                                                                                                                                                                                                                                                    |

SCHOLARONE™  
Manuscripts

1  
2  
3 **The INvolvement of breast CANcer patients during oncological consultations. A multi-centre**  
4 **randomized controlled trial. The INCA study protocol.**  
5  
6  
7  
8

9 Claudia Goss<sup>\*1</sup>, Alberto Ghilardi<sup>2</sup>, Giuseppe Deledda<sup>1</sup>, Chiara Buizza<sup>2</sup>, Alessandro Bottacini<sup>1</sup>, Lidia Del Piccolo<sup>1</sup>,  
10 Michela Rimondini<sup>1</sup>, Federica Chiodera<sup>1</sup>, Maria Angela Mazzi<sup>1</sup>, Mario Ballarin<sup>1</sup>, Irene Bighelli<sup>1</sup>, Maria Grazia  
11 Strepparava<sup>3</sup>, Annamaria Molino<sup>4</sup>, Elena Fiorio<sup>4</sup>, Rolando Nortilli<sup>5</sup>, Chiara Caliolio<sup>5</sup>, Serena Zuliani<sup>5</sup>, Alessandra  
12 Auremma<sup>5</sup>, Federica Maspero<sup>5</sup>, Edda Lucia Simoncini<sup>6</sup>, Fulvio Ragni<sup>7</sup>, Richard Brown<sup>8</sup>, Christa Zimmermann<sup>1</sup>  
13  
14  
15  
16  
17  
18

19 <sup>1</sup> Department of Public Health and Community Medicine, Section of Clinical Psychology, University of Verona, Italy

20 <sup>2</sup> Department of Childcare and Biomedical Technologies, Section of Clinical and Dynamic Psychology, Faculty of Medicine and  
21 Surgery, University of Brescia, Italy  
22

23 <sup>3</sup> Department of Experimental Medicine, Section of Clinical Psychology, Faculty of Medicine and Surgery, University of Milano-  
24 Bicocca, Italy  
25

26 <sup>4</sup> O.U. of Oncology d.O., Ospedale Civile Maggiore, Hospital Trust of Verona, Italy  
27

28 <sup>5</sup> O.U. of Oncology, Policlinico G. Rossi, Hospital Trust of Verona, Italy  
29

30 <sup>6</sup> Medical Oncology, Spedali Civili, Brescia, Italy  
31

32 <sup>7</sup> General Surgery 2, Spedali Civili, Brescia, Italy  
33

34 <sup>8</sup> Department of Social and Behavioral Health, School of Medicine, Virginia Commonwealth University, Richmond, VA, USA  
35  
36  
37

38 \*Corresponding author

39 Department of Public Health and Community Medicine

40 University of Verona

41 Policlinico G.B. Rossi, P.le L.A. Scuro 10, 37134 Verona, Italy

42 Tel +39 045 8124441

43 Fax +39 045 8027498

44 Email addresses: claudia.goss@univr.it  
45  
46  
47  
48  
49  
50  
51  
52

53 *Word count: 4392*  
54  
55  
56  
57

58 *Key- word:* patient involvement, breast cancer, doctor-patient communication  
59  
60

## ABSTRACT

**Introduction:** Studies on patient involvement show that physicians make few attempts to involve their patients who ask few questions if not facilitated. On the other hand, patients who participate in the decision making process show greater treatment adherence and have better health outcomes. Different methods to encourage the active participation during oncological consultation have been described, however similar studies in Italy are lacking. The aims of the present study are to 1) assess the effects of a pre-consultation intervention to increase involvement of breast cancer patients during the consultation, and 2) explore the role of the family member-attending companions in the information exchange during the consultation.

**Methods and analysis:** All female patients with breast cancer who attend the Oncology Out-patient Services for the first time will provide informed consent to participate in the study. They are randomly assigned to the intervention or to the control group.

The intervention consists of the presentation of a list of relevant illness-related questions, called a question prompt-sheet (QPS).

The primary outcome measure of the efficacy of the intervention is the number of questions asked by patients during the consultation. Secondary outcomes are: the involvement of the patient by the oncologist; the patient's perceived achievement of her information needs; the patient's satisfaction and ability to cope, the quality of the doctor-patient relationship in terms of patient-centeredness and the number of questions asked by the companions and their involvement during the consultation. All outcome measures are supposed to significantly increase in the intervention group.

**Ethics and Dissemination:** The study was approved by the local Ethics Committee of the Hospital Trust of Verona. Study findings will be disseminated through peer-reviewed publications and conference presentations.

**Trial registration:** ClinicalTrials.gov identifier: NCT01510964

## ARTICLE SUMMARY

### Article focus

- This article assesses if a pre consultation intervention (QPS) facilitates greater participation of female patients (and attending companions when present) in the consultation process, by determining an increase in questioning and/or in the number of different illness related issues (e.g. diagnosis, treatment, prognosis) being discussed with the oncologist.
- This article assesses the effect of the QPS on the level of patient involvement by the oncologists, on patient satisfaction and coping, on the oncologist's perception of patient's preferred decisional role and to explore the role of the companion.

### Key messages

- The involvement and participation of patients in therapeutic programs is of great interest not only to physicians but to all health professionals engaged in improving patients' adherence to treatment regimens or operating in the field of health promotion.
- We expect that patients who have the opportunity to rehearse their information needs before the consultation will ask a greater number of questions which in turn will determine their greater involvement by the physician and a greater number of satisfied needs.
- We also expect that the straightforward use of a list of printed questions of potential relevance for cancer patients and their companions at an early stage of illness, by modifying the process of information exchange, will increase their participation and satisfaction with the consultation, with potential benefits for treatment adherence and consequently treatment efficacy.

### Strengths and limitations of this study

- To our knowledge this is the first RCT in Europe which assesses the effects of QPS on cancer patients' involvement during the consultation, on their satisfaction and confidence in coping with illness, and which explores the role of the companion during the consultation.
- QPS in this study is administered before the consultation and collected by the researcher and not available to the patient during the consultation. Thus patients may not remember their

1  
2  
3 questions selected on the QPS and undermine the hypothesis of the greater participation of the  
4  
5 QPS intervention group.  
6  
7  
8  
9  
10  
11  
12  
13  
14  
15  
16  
17  
18  
19  
20  
21  
22  
23  
24  
25  
26  
27  
28  
29  
30  
31  
32  
33  
34  
35  
36  
37  
38  
39  
40  
41  
42  
43  
44  
45  
46  
47  
48  
49  
50  
51  
52  
53  
54  
55  
56  
57  
58  
59  
60

For peer review only



## INTRODUCTION

In recent years the interest in communication issues in cancer care has steadily increased, in particular regarding the information needs of oncology patients, the communication of bad news and their impact on the patient, and the development of guidelines on how to deliver bad news in a sensitive way.[1, 2]

The evidence indicates that patient's preferences for the type and amount of information vary. This requires physicians to adapt the information giving process to the needs and to the level of comprehension of the single patient. If the expression of such needs is not facilitated or encouraged, these needs tend to remain hidden, with the risk that the patient perceives the received information as either too much or too little. Good clinical practice entails the recognition of variations in patients' preferences, and helping patients accomplish these preferences. When we meet patients' information preferences, patients are better able to handle the information in a way that fits them best, which is associated with better quality of care, coping with illness and treatment adherence.[3]

In the last decade, the focus of many studies has been directed towards activating patients to be more involved in their treatment.[4] How the physician conducts the interview and gives information [5] has a direct effect on the participation of the patient. It has been observed that what the physician says has an immediate effect on what the patients says and therefore can also influence the degree of patient participation in the consultation.[6, 7] To stimulate patients' participation in consultations, patients were encouraged by their doctor to ask questions or advised to prepare a list of questions,[8] or to select their questions from a printed list before the consultation (question prompt sheet-QPS).[4, 9-17] These tools were helpful both for patients and physicians. They improved patient participation and the recall of information after the consultation. Nevertheless there is a need to replicate these studies in different cultural contexts in order to test the feasibility of such aids and to support the findings.

In Italy, during the medical consultation, patients are frequently accompanied and assisted by a companion: a close family member or another key person. In this context the activation and

1  
2  
3 involvement of the patient interacts with that of the companion and contributes to the  
4  
5 communication dynamics of the consultation. Olhen and colleagues[18] explored the importance of  
6  
7 significant others in therapeutic decisions and highlighted the notion of “relational autonomy”,  
8  
9 which acknowledges that people are defined by their relationships and are dependent on others in  
10  
11 making decisions.[19] Future research that analyses patients and companions as dyadic units would  
12  
13 offer further insight into the impact of social relations on treatment decision-making processes.  
14  
15 More evidence on the information needs of companions regarding the patient and their role in the  
16  
17 information and decision processes during the consultation is also needed.  
18  
19

20  
21 To our knowledge this is the first RCT in Europe which assesses the effects of a pre-consultation  
22  
23 intervention (QPS) on cancer patients’ involvement during the consultation, on their satisfaction  
24  
25 and confidence in coping with illness, and which explores the role of the companion during the  
26  
27 consultation.  
28  
29

## 30 31 **METHODS AND ANALYSIS**

### 32 33 **Study design**

34  
35 This is a multicentre, randomized controlled trial in which patients are attributed randomly to the  
36  
37 intervention or to the control group on a 1:1 basis. Patients in the intervention group are given the  
38  
39 QPS, a list of 50 specific questions (see below), those in the control group are given a control sheet  
40  
41 on which to write the questions they would like to ask. The oncologists are informed about the  
42  
43 study protocol but are blinded to whether the patient is a participant of the control group or the  
44  
45 intervention group. The oncologists perform their consultation as usual, according to the clinical  
46  
47 practice of their centre. After concluding the consultation, they complete two questionnaires  
48  
49 (DPRQ-10 and CPS, see the Measures section for details) regarding the patient and the consultation.  
50  
51

52  
53 This protocol follows the CONSORT guidelines.[20]

54  
55 Standardized questionnaires are administered at baseline (before the randomization) and  
56  
57 immediately after the consultation (figure 1, table 1).  
58  
59  
60

**Figure 1** INCA Study flow diagram

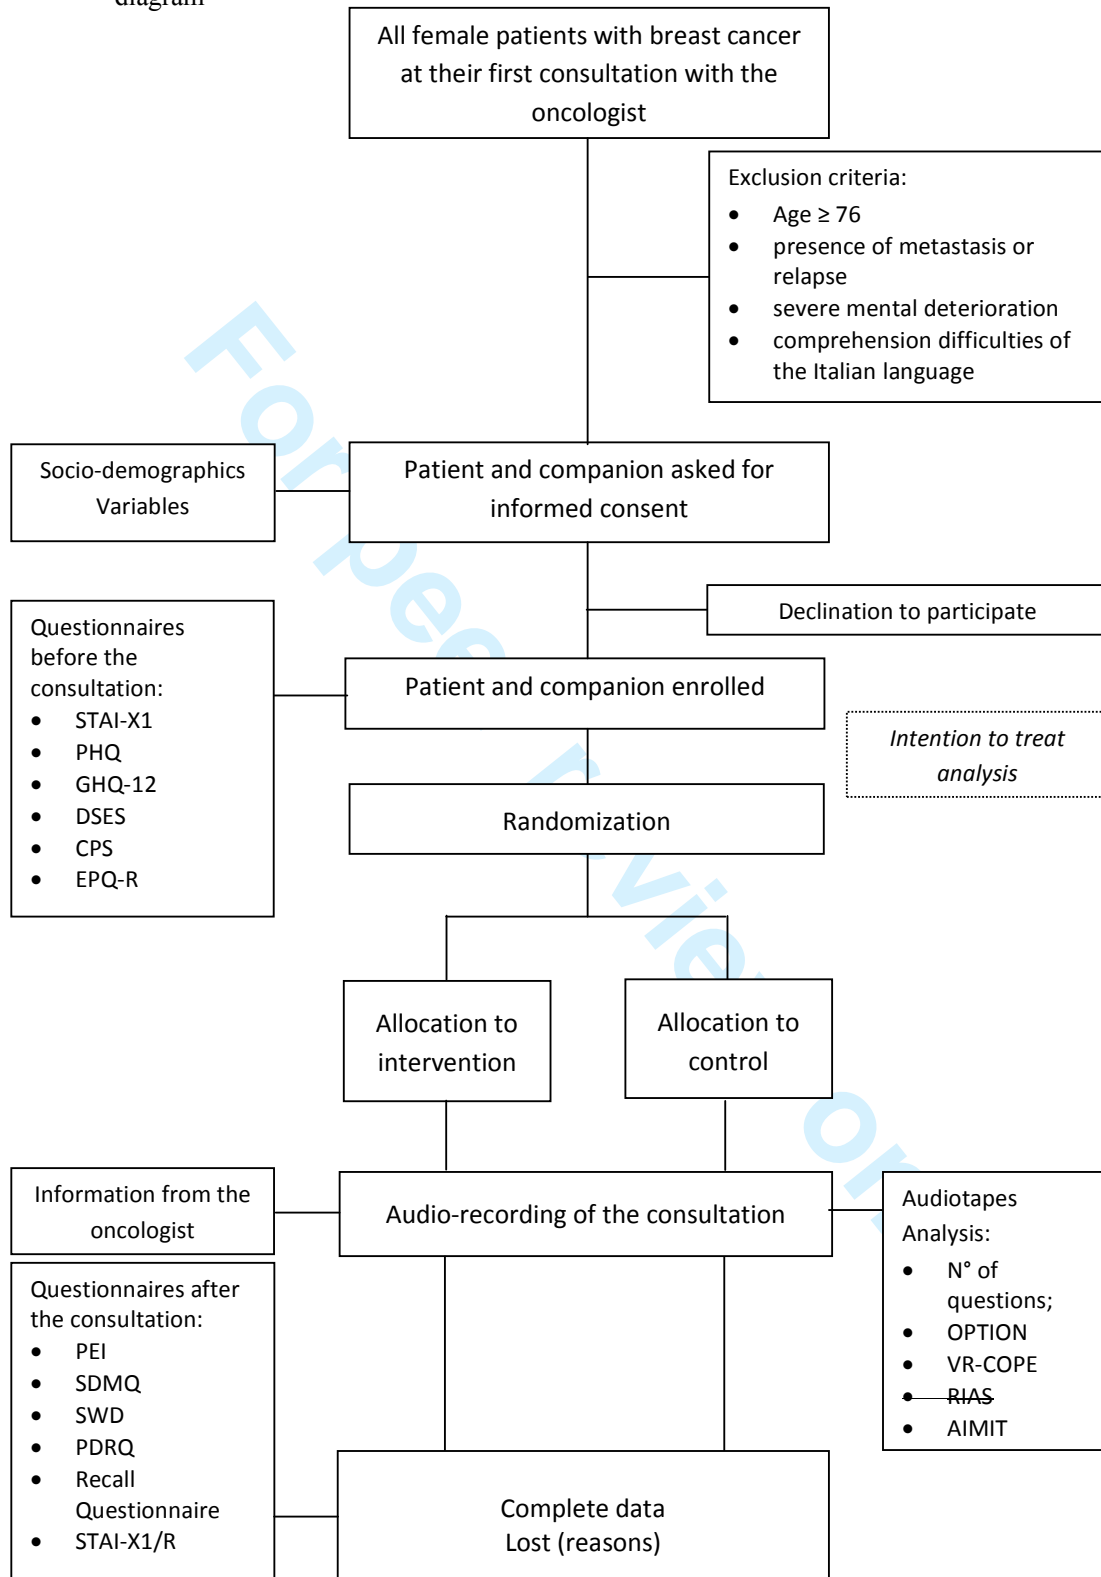

Table 1 Questionnaires and tools used in the study

| Tool                                                                  | Evaluation                            | Explored area                                 | N° items                                             | Time                    |
|-----------------------------------------------------------------------|---------------------------------------|-----------------------------------------------|------------------------------------------------------|-------------------------|
| <b>State-Trait Anxiety Inventory – X1 (STAI-X1)</b>                   | Patient and companion                 | State anxiety level                           | 20                                                   | Before the consultation |
| <b>Patient Health Questionnaire – 9 (PHQ-9)</b>                       | Patient and companion                 | Depression                                    | 9                                                    | Before                  |
| <b>General Health Questionnaire – 12 (GHQ-12)</b>                     | Patient and companion                 | Psychological distress                        | 12                                                   | Before                  |
| <b>Decision Self Efficacy Scale (DSES*)</b>                           | Patient and companion                 | Confidence with decision                      | 11                                                   | Before                  |
| <b>Control Preference Scale (CPS)</b>                                 | Patient and companion and oncologists | Role in the decision making process           | 5 vignettes<br>Participant chooses the one preferred | Before                  |
| <b>Eysenck Personality Questionnaire – Reduced form (EPQ-R)</b>       | Patient and companion                 | Personality traits                            | 24                                                   | Before                  |
| <b>Doctor-Patient Scale (DP)</b>                                      | Oncologists                           | Oncologists' communication style              | 48                                                   | One time only           |
| <b>Patient Enablement Instrument (PEI)</b>                            | Patient and companion                 | Ability to cope with illness                  | 6                                                    | After the consultation  |
| <b>Shared Decision Making Questionnaire (SDMQ*)</b>                   | Patient and companion                 | Patient involvement                           | 9                                                    | After                   |
| <b>Satisfaction With Decision scale (SWD*)</b>                        | Patient and companion                 | Satisfaction with decision                    | 6                                                    | After                   |
| <b>Patient-Doctor Relationship Questionnaire – 9 (PDRQ-9*)</b>        | Patient and companion                 | Doctor-Patient relationship                   | 9                                                    | After                   |
| <b>Recall questionnaire (RECALL*)</b>                                 | Patient and companion                 | Recalling and understanding of information    | 10                                                   | After                   |
| <b>State-Trait Anxiety Inventory – X1/Reduced form (STAI-X1/R)</b>    | Patient and companion                 | State anxiety level                           | 10                                                   | After                   |
| <b>Difficult Doctor-Patient Relationship Questionnaire (DDPRQ-10)</b> | Oncologists                           | Difficulties in relationship with the patient | 12                                                   | After                   |

|                                                                        |                |                                                      |                                                                               |       |
|------------------------------------------------------------------------|----------------|------------------------------------------------------|-------------------------------------------------------------------------------|-------|
| <b>Control Preference Scale (CPS)</b>                                  | Oncologists    | Patient's role in the decision making process        | 5 vignettes<br>Oncologist chooses the one supposedly preferred by the patient | After |
| <b>AUDIORECORDING</b>                                                  | Consultation   | Interaction between doctor and patient               | -                                                                             | -     |
| <b>Observing Patient Involvement in Decision Making scale (OPTION)</b> | External rater | Professional behaviours intended to involve patients | 12                                                                            | -     |
| <b>Verona Patient-centred Communication Evaluation scale (VR-COPE)</b> | External rater | Aspects of patient-centred communication             | 9                                                                             | -     |
| <b>RIAS</b>                                                            | External rater | Verbal communication                                 | 40                                                                            | -     |
| <b>Assessing Interpersonal Motivations in Transcripts (AIMIT)</b>      | External rater | Activity of interpersonal motivational systems       | Coding system applied on transcripts.                                         | -     |

\*Adapted version for companion

Time required for answering the questionnaires was approximately 15 – 20 minutes before the consultation and 10 – 15 minutes after.

### Intervention

Patients and companions (if present) of both, intervention and control group, receive a form on which to write their reply to the following request: "Please indicate the issues which you want to discuss today with your oncologist".

Patients and companions (if present) of the intervention group receive the QPS in addition to the form described above. An introduction explains the importance of asking questions during the consultations. The patient (and companion) is invited to select among a written list of about 50 possible questions those, if any, she would like to ask today to the oncologist. These questions have

1  
2  
3 been chosen and adapted on the basis of previous studies in the field [4, 9-11] and are divided by  
4  
5 topics. Questions regard diagnosis (e.g. “Of what type is my cancer?”), treatment (e.g. “Which are  
6  
7 the pros and cons of the treatment?”), contribution of patient and lifestyle (“What can I do to  
8  
9 improve the efficacy of treatment?”), prognosis (“What are the chances of relapse?”) and other  
10  
11 issues (e.g. “Do I need a referral from my GP for the next visit?”).  
12  
13

### 16 **Setting**

17  
18 Patients are being recruited from three Oncology Departments in Northern Italy: two run by  
19  
20 Hospital Trust of Verona in the Veneto region (placed in two different part of the city) and one by  
21  
22 the Hospital Trust of Brescia, in the Lombardia region.  
23

24  
25 The population of Verona city and its province in 2010 is about 914 382, the population of Brescia  
26  
27 city and its province about 1 242 923.[21] In the Veneto region the estimation of incidence of breast  
28  
29 cancer in 2010 was 4 424 new cases per year (Standardized rate adjusted for age using the European  
30  
31 population as standard (std) per 100,000= 133). In the Lombardia region the estimation of incidence  
32  
33 of breast cancer in 2010 was 7 456 new cases per year (std = 109).[22]  
34

35  
36 The three Oncology departments have an out-patient clinic dedicated to breast cancer patients with  
37  
38 a rotation of 2-5 oncologists.  
39

40  
41 Visits are scheduled on fixed days with a number of 4 - 8 patients per day. Patients have already  
42  
43 been diagnosed with cancer, have already been visited by the surgeon and undergone breast  
44  
45 operation (e.g. lumpectomy). Generally in the first visit with the oncologist the histological results  
46  
47 are communicated and further medical treatment is decided (e.g chemotherapy, hormone therapy).  
48

49  
50 The length of the visit can vary from 30 to 60 minutes.  
51

### 54 **Sample and recruitment**

55  
56 The study sample will be composed of all consecutive female patients between the age of 18 to 75  
57  
58 years who attend the Oncology out-patient clinics of the participating centres and who have a recent  
59  
60

1  
2  
3 diagnosis of breast cancer at an early stage (absence of metastasis). Exclusion criteria are the  
4  
5 presence of metastasis or relapse, severe mental deterioration, comprehension difficulties of the  
6  
7 Italian language. A sample of 300 patients will be recruited, as estimated by the sample size  
8  
9 calculation (see below). Recruitment phase started in June 2011 and will continue for two years or  
10  
11 till enrolment will be completed .  
12

### 13 14 15 16 **Procedure**

17  
18 Before the recruitment phase the oncologists were informed about the study and asked to  
19  
20 participate, giving a written informed consent.  
21

22  
23 All breast cancer female patients at their first out-patient visit with the oncologist of the Clinical  
24  
25 Oncology Department (and their companions if present), are being asked by a project member to  
26  
27 give written informed consent to participate in the study (figure 1).  
28

29  
30 Consenting patients and companions receive an envelope containing six questionnaires to answer  
31  
32 before the consultation (baseline assessment) (table 1). The project staff member (MAM) then  
33  
34 randomly allocates consenting patients and their companions to the intervention or control group  
35  
36 (see also paragraph “Randomization”). Another project staff member (AB, CB, IB or FC) hands out  
37  
38 the envelopes with either the intervention prompt sheet or the control sheet and collect the sheets  
39  
40 after their completion. These was done in order to keep the oncologists blind to the intervention or  
41  
42 control status.  
43

44  
45 The subsequent consultation is audio recorded. After the consultation, patients and their  
46  
47 companions complete six other questionnaires.; A project member is present (AB, CB, IB or  
48  
49 FC)and provides support to the patient or to the companion if they are too much troubled after the  
50  
51 consultation.  
52

53  
54 The oncologists reports on a form the cancer stage and type, when and by whom the patient was  
55  
56 informed about diagnosis, and the therapeutic options appropriate for this patient. They also  
57  
58 complete a questionnaire measuring their perception of the patient as difficult.  
59  
60

1  
2  
3 The audio tapes and oncologists' forms are collected by the project staff.  
4

5 The audio tapes are examined for the content and number of questions asked by patients and  
6 companions, and are rated applying the OPTION scale,[23-25] which measures the extent to which  
7 the oncologist has succeeded to involve the patient in the consultation. The questions that emerge  
8 during the consultations are compared with those expressed before the visit. The audio recorded  
9 consultations are also analyzed in terms of patient-centredness with the VR-COPE [26] and with the  
10 Assessment of Interpersonal Motivation in Transcripts (AIMIT) [27] which evaluates the five  
11 different motivational systems that guide the verbal and non verbal behaviours during interactions.  
12  
13  
14  
15  
16  
17  
18  
19  
20  
21  
22

### 23 **Randomization**

24  
25 The randomization sequence is being conducted off-site using the “random allocation of treatments  
26 balanced in blocks (ralloc)” package for Stata[28] and is stratified by centre with a 1:1 allocation  
27 ratio of treatment. Block randomization (size 4) is used to minimize large imbalances between the  
28 intervention groups. The allocation sequences are generated by an independent individual, are  
29 stored in computer files and remain unknown to the researchers until the patient is randomized.  
30  
31  
32  
33  
34  
35

36 The QPS or the control sheet, chosen for the two arms of trial, are placed in opaque envelopes,  
37 sealed and numbered in sequence (following the list generated by the randomization procedure) by  
38 a staff member of each centre (MAM and CB), not involved in the data collection phase. Both  
39 randomization procedure and treatment allocation have been developed to fully conceal treatment  
40 allocation.[20, 29]  
41  
42  
43  
44  
45  
46

47 Patients and oncologists are unaware of the allocation. The raters who analyze the audio- recordings  
48 are also blinded to the allocation of patients.  
49  
50  
51  
52  
53

### 54 **Study aims and hypotheses**

55  
56 The main aim is to assess if a pre consultation intervention (QPS) facilitates greater participation of  
57 female patients in the consultation process, by determining an increase in questioning and/or in the  
58  
59  
60



1  
2  
3 number of different illness related issues (e.g. diagnosis, treatment, prognosis) being discussed with  
4  
5 the oncologist.

6  
7 Other aims are to assess the effect of the QPS on the level of patient involvement by the  
8  
9 oncologists, on patient satisfaction and coping, on the oncologist's perception of patient's preferred  
10  
11 decisional role (using the CPS, more details see the measures section) and to explore the role of the  
12  
13 companion. In detail the study investigates if the intervention determines:

- 14  
15 – a greater number of personal information needs expressed during the consultation (the number  
16  
17 and type of the questions asked during the consultation);
- 18  
19 – the perception of a greater capacity to cope with illness and a greater satisfaction with decisions  
20  
21 made during the consultation (measured with the PEI and SWD; details are described in the  
22  
23 measures section);
- 24  
25 – greater patient generated and/or doctor generated involvement of the patient (using the OPTION  
26  
27 scale and SDM-Q; details are described in the Measures section);
- 28  
29 – a better understanding of the received information and greater satisfaction (measured with the  
30  
31 Recall questionnaire and the SWD);
- 32  
33 – a different perception by the oncologist of patient's preference regarding her participation in  
34  
35 therapeutic decisions (measured with the CPS answered by the oncologist; details are described  
36  
37 in the Measures section);
- 38  
39 – a different perception by the oncologist and by the patient of the doctor-patient relationship  
40  
41 (using the DPRQQ 9 and DPRQ-10, see measures section for the details);
- 42  
43 – a more patient-centred and sharing approach during the consultation (using the VR-COPE and  
44  
45 the AIMIT; see Measures section for the details).

46  
47 The potential presence of a companion during the consultation allows us to explore if the “question  
48  
49 prompt sheet” intervention (extended to the companion) changes the companions' role and  
50  
51 participation during the consultation . Number and type of questions asked by the companion during  
52  
53 the consultation are also recorded  
54  
55  
56  
57  
58  
59  
60

1  
2  
3 Companions answer the same questionnaires as the patient: PEI for the evaluation of the ability to  
4 cope with the patients' illness, SDM-Q for the evaluation the perceived involvement during the  
5 consultation, SWD for the satisfaction with decision, PDRQ-9 for the doctor-patient-relationship,  
6 and Recall Questionnaire for the understanding of the information received. Where necessary,  
7 questionnaires were adapted to the companions by substituting the first person (I) used in the  
8 patient version, with the third person (she).For example: "I feel confident that I can get the facts  
9 about the medication choices available to her" instead of "I feel confident that I can get the facts  
10 about the medication choices available to me" (item 1 of the DSES Scale).  
11  
12  
13  
14  
15  
16  
17  
18  
19  
20  
21  
22  
23  
24

## 25 **Study measures**

### 26 27 28 29 **Socio demographic and clinical data**

30  
31 Socio demographic data are: age, education, family status and employment status, type of  
32 relationship with the companion (if present), reported both by patients and companions during the  
33 baseline assessment.  
34  
35  
36

37  
38 Oncologists' socio demographic data are: age, gender and years of experience. Data for oncology  
39 residents (when present during the consultation) are also obtained.  
40  
41

42  
43 Clinical data are: cancer stage and type, duration of illness (who has informed patient on diagnosis  
44 and when), therapeutic options considered appropriate for this patient, all reported on a form by the  
45 oncologist.  
46  
47  
48

### 49 50 51 **Primary outcome measure**

- 52  
53  
54 – The total number of patient's questions during the consultation regarding diagnosis, prognosis,  
55 treatment, lifestyle and other issues. Question asking is considered an index of patient's  
56 participation during the consultation. The QPS aims to increase the number of question by  
57  
58  
59  
60

1  
2  
3 giving the opportunity to patients to reflect on their informative needs choosing among a wide  
4  
5 range of possible questions those ones perceived as most relevant in view of the subsequent  
6  
7 consultation.  
8  
9

### 10 11 **Secondary outcome measures**

- 12  
13  
14 – The number of unmet information needs that emerge during the consultation. This measure is  
15  
16 obtained by comparing the number of questions indicated by patients and their companion  
17  
18 before the consultation (i.e., those selected in the QPS by patient) with those actually raised  
19  
20 during the consultation (i.e., those identified subsequent to listening to the audio-recordings).  
21  
22
- 23 – Ability to cope with the illness, measured with the Patient Enablement Instrument (PEI). This  
24  
25 questionnaire is a self-administered questionnaire of six items on a Likert scale from 0 (same or  
26  
27 less) to 2 (much better, much more)[30]. We suppose a better ability to cope with the illness in  
28  
29 the intervention group.  
30  
31
- 32 – Patient involvement, measured with the Shared Decision Making Questionnaire (SDM-Q) and  
33  
34 the OPTION Scale. The SDM-Q is a self administered questionnaire of 9 items on a Likert scale  
35  
36 from 1 (completely disagree) to 6 (agree completely) and assesses patients' perception of the  
37  
38 decisional process and their level of involvement during the consultation, the information  
39  
40 received on therapeutic options, the potential risks and benefits regarding the participation at the  
41  
42 decisional process.[31, 32] The OPTION Scale is composed of 12 items of operational  
43  
44 definitions of different patient involving skills, rated on a Likert scale from 0 (behaviour absent)  
45  
46 to 4 (behaviour observed at an excellent skill level)[23-25]. The scale is applied by trained raters  
47  
48 to the audio recording of the consultation. In summary, it examines whether problems are well  
49  
50 defined, whether options are formulated, information provided, patient understanding and role  
51  
52 preference evaluated, and decisions examined from both the professional and patient  
53  
54 perspective. The total score ranges from 0 (0 in all items) to 48 (4 in all items) and is  
55  
56  
57  
58  
59  
60

1  
2  
3 transformed into a 0 -100 score. We suppose a higher patient involvement during the  
4 consultation in the intervention group.

- 5  
6  
7 – Satisfaction with decisions made during the consultation, measured with the Satisfaction with  
8 Decision Scale (SWD). This is a self administered questionnaire of 6 items on a Likert scale  
9 from 0 (completely disagree) to 5 (agree completely) [33]. We suppose a higher patient  
10 satisfaction of patients in the intervention group.
- 11  
12 – Recalling and understanding of information, measured with the Recall Questionnaire. This  
13 questionnaire consists of six questions which ask the patient to recall the received information  
14 on treatment decisions and pathology (e.g. “What was the treatment decision? Which treatment  
15 options were discussed?”). The questions have been prepared for the present study with  
16 reference to previous studies.[11, 34, 35] The questionnaire allows with the help of the audio  
17 recorded consultation to evaluate patient’s correct recall and understanding by comparing  
18 patients’ reports with what was actually discussed during the consultation. We suppose that  
19 patients assigned to the intervention group can recall more precise information.
- 20  
21 – Three other questions, rated on a 0 (no at all) to 5 (very much) Likert scale asked whether the  
22 patient succeeded in their purpose of question asking, whether the oncologist answered the  
23 questions properly and how much more information she would have needed. We suppose that  
24 patients assigned to the intervention group felt themselves more successful in question asking.
- 25  
26 – Overall consultation atmosphere, is measured with the Verona Patient-centred Communication  
27 Evaluation scale (VR-COPE) and the Assessing Interpersonal Motivations in Transcripts  
28 (AIMIT).[27] VR-COPE [26] assesses the content, the process and relational aspects of patient-  
29 centred communication during medical consultations on the basis of a multidimensional  
30 evaluation and comprises nine items. Each item is defined by operational definitions and rated  
31 on a 0-10 point scale. The scale is applied by trained raters on the audio-recording of the  
32 consultation. We expect that patients of the intervention group establish a better relationship  
33 with their oncologist and show higher scores in patient-centred communication. AIMIT[27] is a  
34  
35  
36  
37  
38  
39  
40  
41  
42  
43  
44  
45  
46  
47  
48  
49  
50  
51  
52  
53  
54  
55  
56  
57  
58  
59  
60

1  
2  
3 coding system applied on transcripts aiming to systematically detect the activity of interpersonal  
4 motivational systems. Systems identified are five (attachment, caregiving, rank, sexuality, peer  
5 cooperation) and they guide the verbal and non verbal behaviours during interactions. We  
6  
7 suppose that patients of the intervention group evidence a more cooperative style during the  
8 consultation.  
9

- 10  
11  
12  
13  
14 – Perceived Patient-doctor relationship, measured with the Patient – Doctor Relationship  
15 Questionnaire (PDRQ-9) and the Difficult Doctor Patient Relationship Questionnaire (DDPRQ-  
16 10). PDRQ-9 is a self-administered questionnaire of 9 items on a Likert scale from 1 (not at all  
17 appropriate) to 5 (totally appropriate), to measure the relationship between the doctor and the  
18 patient, from a patient point of view.[36] The DDPRQ-10 (is a self-report instrument of 10  
19 items on a Likert scale from 1 (not at all) to 6 (a great deal), is completed by physicians after the  
20 encounter with a patient.[37, 38] The questionnaire identifies the patients experienced as  
21 difficult patients. We suppose that the doctor-patient relationship in the intervention group is  
22 perceived as less difficult.  
23  
24  
25 – Oncologists answered three questions on the potential presence of anxiety, depression or  
26 emotional distress in the patient and a fourth on their difficulty experienced in answering the  
27 patient's questions. Answering questions of patients in the intervention group should be  
28 perceived by oncologists as less difficult.  
29  
30  
31 – Perceived role preference of the patient, measured with the Control Preference Scale (CPS,  
32 Oncologist version) [39, 40]. This scale assesses how the oncologist perceives the role that  
33 patient might prefer regarding the decision making process. Oncologists should be better able to  
34 identify patients preferred role in the intervention group.  
35  
36  
37 – Duration of the consultation, measured in minutes. We suppose a longer duration of the  
38 consultation in the intervention group.  
39  
40  
41  
42  
43  
44  
45  
46  
47  
48  
49  
50  
51  
52  
53  
54  
55  
56  
57  
58  
59  
60

### Process related and potential confounding variables

1  
2  
3 The measures below have been collected in order to check their possible influence on question  
4 asking (primary outcome).  
5  
6

- 7  
8 – Anxiety, depression and general well-being, measured with the State Anxiety Inventory (STAI-  
9 X1, XR),[41-43] the Patient Health Questionnaire depression scale (PHQ-9) [44-46] and the  
10 General Health Questionnaire (GHQ-12) [47].  
11

12  
13 STAI-X1 is a self-administered questionnaire of 20 items on a Likert scale from 1 (not at all) to  
14 4 (very much) completed before the consultation. Higher total scores indicate greater state  
15 anxiety. The STAI-X1R, administered after the consultation, is a shorter version of ten out of  
16 the twenty items of the STAI-X1, and it is used to evaluate the state anxiety level at the end of  
17 the consultation and to compare this level with the one measured at the beginning. PHQ-9 is a  
18 self-assessment questionnaire for detecting the presence of depression and consists of 9 items  
19 with response options of 0 (not at all) to 3 (almost every day), and has a summative score range  
20 of 0 to 27. We score it in the standard way, using the sum of the 0–3 scores for each item, and  
21  $\geq 8$  as a cut-score for possible cases of depression [44-46]. GHQ-12 is a self administrated  
22 questionnaire of 12 items and has a summative score range of 0 to 12 and a cut-score of  $>3$   
23 indicating psychological distress.[47]  
24  
25  
26  
27  
28  
29  
30  
31  
32  
33  
34  
35  
36  
37

- 38 – Personality traits, measured with the Eysenck Personality Questionnaire (EPQR-S) [48]. The  
39 EPQR-S is a self-administered questionnaire of 48 items on yes/no scale. For our study we use  
40 two subscales: the Extraversion/Introversion (12 items) and Neuroticism/Stability (12 items).  
41 The “Extroversion” is characterized by being outgoing, talkative, high on positive affect (feeling  
42 good) and in need of external stimulation. The “Neuroticism” or emotionality is characterized  
43 by high levels of negative affect such as depression and anxiety.  
44  
45  
46  
47  
48  
49  
50  
51 – Confidence with decision, measured with the Decision Self Efficacy Scale (DSES).[49] This  
52 self- administered questionnaire for patients consists of 11 items on a Likert scale from 0 (not at  
53 all confident) to 4 (very confident).  
54  
55  
56  
57  
58  
59  
60

- 1  
2  
3 – Patients' and their companion's preference for the role they want to have in the decision making  
4 process, measured with the Control Preference Scale (CPS) [39, 40]. This self-administered  
5 instrument contains 5 vignettes with text, depicting different patient roles (from active to  
6 passive) from which patients choose the one considered as most appropriate for them.  
7  
8  
9  
10  
11 – Patient-centred communication style and attitude toward the doctor-patient relationship,  
12 measured with the Doctor-Patient (DP) Scale [50]. The Scale measures the degree of  
13 oncologists' self reported patient or doctor-centred communication style and attitude. It consists  
14 of 48 statements to rate on a Likert scale from 1 (strong agreement) to 5 (strong disagreement).  
15  
16  
17  
18  
19  
20  
21 It has a summative score range of 48 to 240. The scale is completed by all oncologists who join  
22 the study.  
23  
24  
25  
26

### 27 **Sample size calculation**

28  
29 A sample of 300 patients will be recruited. This number has been estimated to account for  
30 approximately a 15% of withdrawal rate, so that 250-260 patients will complete the study, with  
31 about 130 patients in each arm. The primary outcome measure is the number of patient questions.  
32  
33  
34  
35  
36 The international literature reports a mean number of nine questions (range 0-53) for breast cancer  
37 patients. Since such data are not available in the Italian context, an observational phase was  
38 conducted. We recruited a sample of 30 patients (10 for each centre) with the same characteristics,  
39  
40  
41  
42  
43 in order to assess the number and type of questions asked by the patient during the consultation, to  
44 understand the ongoing interaction between oncologists and patients in a first encounter and to test  
45 the feasibility of procedures and questionnaires. This observational study resulted in a mean number  
46 of 18 (sd=13) patient questions asked during a first encounter with the oncologist. An intervention  
47 intended to increase the number of questions might be considered efficacious with an increase of  
48 30%. The sample size required to evidence such difference was calculated using the sampsi  
49 command of Stata 11,[51] assuming a power of 80% and a two-sided significant level of 5% on a  
50 student t-test for differences between independent groups.[52, 53]  
51  
52  
53  
54  
55  
56  
57  
58  
59  
60

### Statistical analysis

The data will be analyzed according to intention-to-treat principle. [54] Standard statistical techniques will be used to describe characteristics of patients in both groups, and CONSORT flow diagram will be shown in order to explain the phases of trial and inform on the findings confidence.[20] The primary outcome, significant increase of patient questions, will be compared in the two arms using t-test. If adjustment for possible baseline differences among patients (as well as for oncologists and centres) is needed, an analysis of covariance will be done. Regarding secondary outcome measures, multilevel analyses will be used to taking into account the specific effect of the individual oncologist.[55]

### EXPECTED ACHIEVEMENT

The involvement and participation of patients in therapeutic programs is of great interest not only to physicians but to all health professionals engaged in improving patients' adherence to treatment regimens or operating in the field of health promotion.

We expect that female patients who have the opportunity to rehearse their information needs before the consultation will ask a greater number of questions which in turn will determine their greater involvement by the physician and a greater number of satisfied needs. We also expect that the straightforward use of a list of printed questions of potential relevance for cancer patients and their companions at an early stage of illness, by modifying the process of information exchange, will increase their participation and satisfaction with the consultation, with potential benefits for treatment adherence and consequently treatment efficacy. The use of a question prompt sheet might be a simple and quick device in improving the overall communication between oncologist and patient. It might be routinely used before the consultation and also brought into the consultation and discussed with the oncologist to further increase patient and companion participation. Evidence demonstrates that efficacious communication positively influences the understanding and satisfaction of the patient, treatment adherence and health status. Moreover, the oncologist's



1  
2  
3 knowledge and consideration of the information needs of the companions who in Italy are often  
4  
5 present may further facilitate patient's participation in the therapeutic program.  
6  
7  
8

## 9 10 **DISCUSSION**

11 It has been demonstrate in English speaking countries that the Question Prompt sheet is an useful  
12  
13 tool to improve patient's participation during the consultation. There is a need to explore the effect  
14  
15 of a Question Prompt Sheet during oncological consultation also in other countries. To our  
16  
17 knowledge there are no published RCTs in Europe which assess the effects of a pre-consultation  
18  
19 intervention and explore the role and the effect of the companion as well. The study has a strong  
20  
21 design that incorporates computerised random allocation, blinding of data-collection staff and the  
22  
23 use of measures on the audio recordings. The analysis of the consultation recordings is a valuable  
24  
25 research method and is a recommended tool for documenting the interaction between patients and  
26  
27 oncologists. [56]  
28  
29

30  
31 There are some limitations to consider. The QPS was collected prior to the consultation, while in  
32  
33 previous trials reported in literature [4,10-15], patients were allowed to bring the QPS into the  
34  
35 consultation to refer to. Patients in our study therefore might not remember all selected questions  
36  
37 and ask less questions, by this undermining the hypothesis of the greater participation of the QPS  
38  
39 intervention group. On the other hand, in our study oncologists are kept blind to the intervention or  
40  
41 control status of the patients and are not forced to change their routine clinical  
42  
43 approach to the consultation. Once the study will be completed we will discuss the findings with the  
44  
45 oncologists and we hope that afterwards the QPS can be used routinely in their practice.  
46  
47

48  
49 The findings from this study will provide a basis for further research in the field and provide  
50  
51 potentially important results for clinicians, patients and policy makers that may lead to a wider use  
52  
53 of QPS also in other context.  
54  
55

## 56 57 58 **ETHICS AND DISSEMINATION PLANS**

1  
2  
3 The study was approved by the local Ethics Committees of the Hospital Trust of Verona. The study  
4 is registered at ClinicalTrials.gov (identifier: NCT01510964). This protocol follows the CONSORT  
5 guidelines.[20]  
6  
7

8  
9 Recruitment phase started in June 2011 and will continue till the enrolment will be completed and is  
10 expected to be closed in May 2013. Analysis will start after data monitoring and checking is  
11 completed. The dissemination of the trial findings will principally be carried out through  
12 publications in peer-review journal and presentations at national/international conferences focused  
13 on cancer and/or communication, for examples European Association for Communication in Health  
14 Care Conferences and International Shared Decision Making Conferences.  
15  
16  
17  
18  
19  
20  
21  
22  
23  
24

## 25 **FUNDING**

26  
27 This research received no specific grant from any funding agency in the public, commercial or not-  
28 for-profit sectors.  
29  
30  
31  
32  
33

## 34 **COMPETING INTERESTS**

35  
36 The authors declared that they have no competing interest.  
37  
38  
39

## 40 **AUTHORS' CONTRIBUTIONS**

41  
42 CG, LDP, MR, CZ developed the study protocol and together with AG and MGS supervised the all  
43 procedures. MAM is the trial statistician and is responsible for generating the randomization  
44 sequences and providing guidance on statistical analysis of trial data. MB is the computer scientist  
45 that developed the database to save the data. CG drafted the manuscript, will oversee enrolment and  
46 data collection. GD, AB, FC, CB, IB, AM, EF, RN, CC, SZ, AA, FM, ELS, FR participated in  
47 enrolling the patients. All authors saw and approved the final version of the manuscript.  
48  
49  
50  
51  
52  
53  
54  
55  
56  
57

## 58 **REFERENCES**

- 1  
2  
3 1. Buckman R. *Breaking bad news: a guide for healthcare professionals*. Baltimore, MD: John  
4 Hopkins University Press 1992.
- 5  
6  
7 2. Baile WF, Buckman R, Lenzi R, et al. AP. SPIKES - A six-step protocol for delivering bad  
8 news: Application to the patient with cancer. *Oncologist* 2000;**5**:302-311.
- 9  
10  
11 3. Joosten EAG, DeFuentes-Merilla L, de Weert GH, Sensky T, et al. Systematic review of the  
12 effects of shared decision making on patient satisfaction, treatment adherence and health  
13 status. *Psychother Psychosom* 2008;**77**:219-226.
- 14  
15  
16 4. Clayton JM, Butow PN, Tattersall MH, et al. Randomized controlled trial of a prompt list to  
17 help advanced cancer patients and their caregivers to ask questions about prognosis and end-  
18 of-life care. *J Clin Oncol* 2007;**25**:715-723.
- 19  
20  
21 5. Charles C, Gafni A, Whelan T. How to improve communication between doctors and  
22 patients. Learning more about the decision making context is important. *BMJ* 2000;**320**:1220-  
23 1221.
- 24  
25  
26 6. Drew P, Chatwin J, Collins S. Conversation analysis: a method for research into interactions  
27 between patients and health-care professionals. *Health Expectat* 2001;**4**:58-70.
- 28  
29  
30 7. Zimmermann C, Del Piccolo L, Mazzi MA. Patient cues and medical interviewing in general  
31 practice. Examples of the application of sequential analysis. *Epidemiol Psychiatr Soc*  
32 2003;**12**:115-123.
- 33  
34  
35 8. Kidd J, Marteau TM, Robinson S, et al. Promoting patient participation in consultations: a  
36 randomized controlled trial to evaluate the effectiveness of three patient-focused  
37 interventions. *Patient Educ Couns* 2004;**52**:107-12.
- 38  
39  
40 9. Butow PN, Dunn SM, Tattersall MHN, et al. Patient participation in the cancer consultation:  
41 evaluation of a question prompt sheet. *Ann Oncol* 1994;**5**:199-204.
- 42  
43  
44 10. Brown R, Butow PN, Boyer MJ, et al. Promoting patient participation in the cancer  
45 consultation: evaluation of a prompt sheet and coaching in question-asking. *Br J Cancer*  
46 1999;**80**:242-248.
- 47  
48  
49  
50  
51  
52  
53  
54  
55  
56  
57  
58  
59  
60

- 1  
2  
3 11. Brown RF, Butow PN, Dunn SM, et al. Promoting patient participation and shortening cancer  
4 consultations: a randomised trial. *Br J Cancer* 2001;**8**:1273-1279.
- 5  
6  
7 12. Bruera E, Sweeney C, Willey J, et al. Breast cancer patient perception of the helpfulness of a  
8 prompt sheet versus a general information sheet during outpatient consultation: a randomized  
9 controlled trial. *J Pain Symptom Manage* 2003;**5**:412-419.
- 10  
11  
12 13. Glynne-Jones R, Ostler P, Lumley-Graybow S, et al. Can I look at my list? An evaluation of a  
13 'prompt sheet' within an oncology outpatient clinic. *Clin Oncol* 2006;**18**:395-400.
- 14  
15  
16 14. Clayton J, Butow P, Tattersall M, et al. Asking questions can help: development and  
17 preliminary evaluation of a question prompt list for palliative care patients. *Br J Cancer*  
18 2003;**89**:2069-2077.
- 19  
20  
21 15. Clayton JM, Butow PN, Tattersall MH, et al. Randomized controlled trial of a prompt list to  
22 help advanced cancer patients and their caregivers to ask questions about prognosis and end-  
23 of-life care. *J Clin Oncol* 2007;**25**:715-723.
- 24  
25  
26 16. Van der Meulen N, Jansen J, van Dulmen S, et al. Interventions to improve recall of medical  
27 information in cancer patients: a systematic review of the literature. *Psychooncology*  
28 2008;**17**:857-68.
- 29  
30  
31 17. Van Weert JC, Jansen J, Spreeuwenberg PM, et al. Effects of communication skills training  
32 and a Question Prompt Sheet to improve communication with older cancer patients: a  
33 randomized controlled trial. *Crit Rev Oncol Hematol* 2011;**80**:145-59.
- 34  
35  
36 18. Ohlen J, Balneaves L, Bottorff J, et al. The influence of significant others in complementary  
37 and alternative medicine decisions by cancer patients. *Soc Sci Med* 2006;**63**:1625-1636.
- 38  
39  
40 19. Christman J. Relational autonomy, liberal individualism, and the social constitution of selves.  
41 *Philosophical Studies* 2004;**117**:143-164.
- 42  
43  
44 20. Moher D, Hopewell S, Schulz KF, et al. CONSORT 2010 explanation and elaboration:  
45 updated guidelines for reporting parallel group randomized trials. *BMJ* 2010;**340**:c869. DOI:  
46 10.1136/bmj.c869.
- 47  
48  
49  
50  
51  
52  
53  
54  
55  
56  
57  
58  
59  
60

- 1  
2  
3 21. Istituto Nazionale di Statistica (ISTAT) Web site.  
4  
5 <http://www.demo.istat.it/pop2010/index.html>. Accessed October 24, 2012.  
6
- 7 22. Centro Nazionale di Epidemiologia, Sorveglianza e Promozione della Salute - Istituto  
8  
9 Superiore di Sanità (ISS) Web site. [http://www.tumori.net/it3/banca\\_dati/query.php](http://www.tumori.net/it3/banca_dati/query.php). Accessed  
10  
11 October 24, 2012.  
12
- 13 23. Elwyn G, Hutchings H, Edwards A, et al. The OPTION scale: measuring the extent that  
14  
15 clinicians involve patients in decision-making tasks. *Health Expectat* 2005;**8**:34-42.  
16
- 17 24. Goss C, Fontanesi S, Mazzi MA, et al. The assessment of patient involvement across  
18  
19 consultation. The Italian version of the OPTION scale (in Italian). *Epidemiol Psichiatr Soc*  
20  
21 2007;**16**:339-349.  
22
- 23 25. Goss C, Fontanesi S, Mazzi MA, et al. Shared decision making: the reliability of the OPTION  
24  
25 scale in Italy. *Pat Educ Counsel* 2007;**66**:296-302.  
26  
27
- 28 26. Del Piccolo L, Mazzi MA, Scardoni S, et al. A theory based proposal to evaluate patient-  
29  
30 centred communication in medical consultations: the Verona Patient-centred Communication  
31  
32 Evaluation scale (VR-COPE). *Health Education* 2008;**108**:355-372.  
33
- 34 27. Fassone G, Valcella F, Pallini S, et al. Assessment of Interpersonal Motivation in Transcripts  
35  
36 (AIMIT): an inter- and intra-rater reliability study of a new method of detection of  
37  
38 interpersonal motivational systems in psychotherapy. *Clin Psychol Psychother* 2012;**19**: 224-  
39  
40 34.  
41  
42
- 43 28. Ryan P. sxd1 4: Random allocation of treatments in blocks. *Stata Journal* 2008;**8**:146.  
44
- 45 29. Altman DG, Schulz KF, Moher D, et al. The revised CONSORT statement for reporting  
46  
47 randomized trials: explanation and elaboration. *Ann Intern Med* 2001;**134**:663-94.  
48  
49
- 50 30. Howie JG, Heaney DJ, Maxwell M, et al. A comparison of a Patient Enablement Instrument  
51  
52 (PEI) against two established satisfaction scales as an outcome measure of primary care  
53  
54 consultations. *Fam Pract* 1998;**15**:165-171.  
55  
56  
57  
58  
59  
60

- 1  
2  
3 31. Simon D, Chorr G, Wirtz M, et al. Development and first validation of the shared decision  
4 making questionnaire (SDM-Q). *Pat Educ Counsel* 2006;**63**:319-327.
- 5  
6  
7 32. Kriston L, Scholl I, Hölzel L, et al. The 9-item Shared Decision Making Questionnaire (SDM-  
8 Q-9). Development and psychometric properties in a primary care sample. *Patient Educ*  
9  
10  
11  
12  
13  
14 33. Holmes-Rovner M, Kroll J, Schmitt N, et al. Patient satisfaction with health care decisions:  
15 the Satisfaction with Decision Scale. *Med Decis Making* 1996;**16**:58-64.
- 16  
17  
18 34. Gattellari M, Voigt KJ, Butow PN, et al. When the treatment goal is not cure: are cancer  
19 patients equipped to make informed decisions? *J Clin Oncol* 2002;**20**:503-513.
- 20  
21  
22  
23 35. Whelan T, Levine M, Gafni A, et al. Mastectomy or lumpectomy? Helping women make  
24 informed choices. *J Clin Oncol* 1999;**17**:1727-1735.
- 25  
26  
27 36. Van der Feltz-Cornelis CM, Van Oppen P, Van Marwijk HWJ, et al. A patient-doctor  
28 relationship questionnaire (PDRQ-9) in primary care: development and psychometric  
29 evaluation. *Gen Hospit Psychiatry* 2004;**26**:115-120.
- 30  
31  
32  
33 37. Hahn SR, Thompson KS, Wills TA, et al. The difficult doctor-patient relationship:  
34 somatization, personality and psychopathology. *J Clin Epidemiol* 1994;**47**:647-57.
- 35  
36  
37  
38 38. Hahn SR, Kroenke K, Spitzer RL, et al. The difficult patient: prevalence, psychopathology,  
39 and functional impairment. *J Gen Intern Med* 1996;**11**:1-8.
- 40  
41  
42  
43 39. Degner LF, Sloan JA, Venkatesh P. The Control Preferences Scale. *Can J Nurs Res*  
44 1997;**29**:21-43.
- 45  
46  
47 40. Giordano A, Mattarozzi K, Pucci E, et al. Participation in medical decision-making: attitudes  
48 of Italians with multiple sclerosis. *J Neurol Sci* 2008;**275**:86-91.
- 49  
50  
51  
52 41. Spielberger CD. Anxiety as an emotional state. (Vol. 1). New York: Academic Press 1972.
- 53  
54 42. Spielberger CD, Gorsuch RL, Lushene R, et al. Manual for the State-Trait Anxiety Inventory.  
55 Palo Alto, CA: Consulting Psychologists Press 1983.
- 56  
57  
58  
59  
60

- 1  
2  
3 43. Lazzari R, Pancheri P. S.T.A.I. Questionario di autovalutazione dell'ansia di stato e di tratto.  
4  
5 Firenze, IT: Organizzazioni Speciali 1980.  
6  
7 44. Kroenke K, Spitzer RL, Williams JB. The PHQ-9: validity of a brief depression severity  
8  
9 measure. *J Gen Intern Med* 2001;**16**:606-13.  
10  
11 45. Kroenke K, Streine TW, Spitzer RL, et al. The PHQ-8 as a measure of current depression in  
12  
13 general population. *J Affect Disord* 2009;**114**:163-173.  
14  
15 46. Thekkumpurath P, Walker J, Butcher I, et al. Screening for major depression in cancer  
16  
17 outpatients: the diagnostic accuracy of the 9-item patient health questionnaire. *Cancer*  
18  
19 2011;**117**:218-227.  
20  
21 47. Politi PL, Piccinelli M, Wilkinson G. Reliability, validity and factor structure of the 12-item  
22  
23 General Health Questionnaire among young males in Italy. *Acta Psychiatr Scand*  
24  
25 1994;**90**:432-437.  
26  
27 48. Eysenck SBG, Eysenck HJ, Barrett P. A revised version of the psychoticism scale.  
28  
29 *Personality and Individual Differences* 1985;**6**:21-29.  
30  
31 49. O'Connor AM. User Manual-Decision Self-Efficacy Scale. Patient Decision Aids, Ottawa  
32  
33 Hospital Research Institute (OHIR) Web site.  
34  
35 [http://decisionaid.ohri.ca/docs/develop/User\\_Manuals/UM\\_Decision\\_SelfEfficacy.pdf](http://decisionaid.ohri.ca/docs/develop/User_Manuals/UM_Decision_SelfEfficacy.pdf).  
36  
37 Accessed October 24, 2012.  
38  
39 40  
41  
42 50. De Monchy C, Richardson R, Brown RA, et al. Measuring attitudes of doctors: the doctor-  
43  
44 patient (DP) rating. *Med Educ* 1988;**22**:231-239.  
45  
46 51. StataCorp. Stata Statistical Software: Release 11.2. College Station, TX: StataCorp LP 2011.  
47  
48 52. Pocock SJ. Clinical trials: A practical approach. New York: John Wiley & Sons 1983.  
49  
50 53. Sullivan LM, D'Agostino RB. Robustness and power of analysis of covariance applied to  
51  
52 ordinal scaled data as arising in randomized controlled trials. *Stat Med* 2003;**22**:1317-1334  
53  
54 54. Little R, Yau L. Intent-to-treat analysis for longitudinal studies with drop-outs. *Biometrics*  
55  
56 1996;**52**:1324-1333.  
57  
58  
59  
60

- 1  
2  
3 55. Skrondal A, Rabe-Hesketh S. Generalized latent variable modelling: Multilevel, longitudinal,  
4 and structural equation models. New York: Chapman & Hall/CRC 2004.  
5  
6  
7 56. Tattersall MHN, Butow PN. Consultation audio tapes: an underused cancer patient  
8 information aid and clinical research tool. *Lancet Oncol* 2002;3:431-437.  
9  
10  
11  
12  
13  
14  
15  
16  
17  
18  
19  
20  
21  
22  
23  
24  
25  
26  
27  
28  
29  
30  
31  
32  
33  
34  
35  
36  
37  
38  
39  
40  
41  
42  
43  
44  
45  
46  
47  
48  
49  
50  
51  
52  
53  
54  
55  
56  
57  
58  
59  
60



1  
2  
3 **The INvolvement of breast CANcer patients during oncological consultations. A multi-centre**  
4 **randomized controlled trial. The INCA study protocol.**  
5  
6  
7  
8

9 Claudia Goss\*<sup>1</sup>, Alberto Ghilardi<sup>2</sup>, Giuseppe Deledda<sup>1</sup>, Chiara Buizza<sup>2</sup>, Alessandro Bottacini<sup>1</sup>, Lidia Del Piccolo<sup>1</sup>,  
10 Michela Rimondini<sup>1</sup>, Federica Chiodera<sup>1</sup>, Maria Angela Mazzi<sup>1</sup>, Mario Ballarin<sup>1</sup>, Irene Bighelli<sup>1</sup>, Maria Grazia  
11 Strepparava<sup>3</sup>, Annamaria Molino<sup>4</sup>, Elena Fiorio<sup>4</sup>, Rolando Nortilli<sup>5</sup>, Chiara Caliolio<sup>5</sup>, Serena Zuliani<sup>5</sup>, Alessandra  
12 Auremma<sup>5</sup>, Federica Maspero<sup>5</sup>, Edda Lucia Simoncini<sup>6</sup>, Fulvio Ragni<sup>7</sup>, Richard Brown<sup>8</sup>, Christa Zimmermann<sup>1</sup>  
13  
14  
15  
16  
17  
18

19 <sup>1</sup> Department of Public Health and Community Medicine, Section of Clinical Psychology, University of Verona, Italy

20 <sup>2</sup> Department of Childcare and Biomedical Technologies, Section of Clinical and Dynamic Psychology, Faculty of Medicine and  
21 Surgery, University of Brescia, Italy  
22

23 <sup>3</sup> Department of Experimental Medicine, Section of Clinical Psychology, Faculty of Medicine and Surgery, University of Milano-  
24 Bicocca, Italy  
25

26 <sup>4</sup> O.U. of Oncology d.O., Ospedale Civile Maggiore, Hospital Trust of Verona , Italy  
27

28 <sup>5</sup> O.U. of Oncology, Policlinico G. Rossi, Hospital Trust of Verona, Italy  
29

30 <sup>6</sup> Medical Oncology, Spedali Civili, Brescia, Italy  
31

32 <sup>7</sup> General Surgery 2, Spedali Civili, Brescia, Italy  
33

34 <sup>8</sup> Department of Social and Behavioral Health, School of Medicine, Virginia Commonwealth University, Richmond, VA, USA  
35  
36  
37

38 \*Corresponding author

39 Department of Public Health and Community Medicine

40 University of Verona

41 Policlinico G.B. Rossi, P.le L.A. Scuro 10, 37134 Verona, Italy

42 Tel +39 045 8124441

43 Fax +39 045 8027498

44 Email addresses: claudia.goss@univr.it  
45  
46  
47  
48  
49  
50  
51  
52

53 **Word count: 4392**  
54  
55  
56  
57

58 **Key- word:** patient involvement, breast cancer, doctor-patient communication  
59  
60

## ABSTRACT

**Introduction:** Studies on patient involvement show that physicians make few attempts to involve their patients who ask few questions if not facilitated. On the other hand, patients who participate in the decision making process show greater treatment adherence and have better health outcomes.

Different methods to encourage the active participation during oncological consultation have been described, however similar studies in Italy are lacking. The aims of the present study are to 1) assess the effects of a pre-consultation intervention to increase involvement of breast cancer patients during the consultation, and 2) explore the role of the family member-attending companions in the information exchange during the consultation.

**Methods and analysis:** All female patients with breast cancer who attend the Oncology Out-patient Services for the first time will provide informed consent to participate in the study. They are randomly assigned to the intervention or to the control group.

The intervention consists of the presentation of a list of relevant illness-related questions, called a question prompt-sheet (QPS).

The primary outcome main outcome measure of the efficacy of the intervention is the number of questions asked by patients during the consultation. Secondary outcomes are: the involvement of the patient by the oncologist; the patient's perceived achievement of her information needs; the patient's satisfaction and ability to cope, the quality of the doctor-patient relationship in terms of patient-centeredness and the number of questions asked by the companions and their involvement during the consultation. All outcome measures are supposed to significantly increase in the intervention group.

The hypotheses are: the intervention group will have increases in, the number of questions asked by the patient, his/her involvement in the information exchange and the decisional process, the perception that information needs have been met, and the patient-centeredness of the consultations

**Ethics and Dissemination:** The study was approved by the local Ethics Committee of the Hospital Trust of Verona. Study findings will be disseminated through peer-reviewed publications and conference presentations.

**Trial registration:** ClinicalTrials.gov identifier: NCT01510964

## ARTICLE SUMMARY

### Article focus

- This article assesses if a pre consultation intervention (QPS) facilitates greater participation of female patients (and attending companions when present) in the consultation process, by determining an increase in questioning and/or in the number of different illness related issues (e.g. diagnosis, treatment, prognosis) being discussed with the oncologist.
- This article assesses the effect of the QPS on the level of patient involvement by the oncologists, on patient satisfaction and coping, on the oncologist's perception of patient's preferred decisional role and to explore the role of the companion.

### Key messages

- The involvement and participation of patients in therapeutic programs is of great interest not only to physicians but to all health professionals engaged in improving patients' adherence to treatment regimens or operating in the field of health promotion.
- We expect that patients who have the opportunity to rehearse their information needs before the consultation will ask a greater number of questions which in turn will determine their greater involvement by the physician and a greater number of satisfied needs.
- We also expect that the straightforward use of a list of printed questions of potential relevance for cancer patients and their companions at an early stage of illness, by modifying the process of information exchange, will increase their participation and satisfaction with the consultation, with potential benefits for treatment adherence and consequently treatment efficacy.

### Strengths and limitations of this study

- To our knowledge this is the first RCT in Europe which assesses the effects of QPS on cancer patients' involvement during the consultation, on their satisfaction and confidence in coping with illness, and which explores the role of the ~~family member~~ companion during the consultation.
- QPS in this study is administered before the consultation and collected by the researcher and not available to the patient during the consultation. Thus patients may not remember their questions selected on the QPS and undermine the hypothesis of the greater participation of the QPS intervention group.

## INTRODUCTION

In recent years the interest in communication issues in cancer care has steadily increased, in particular regarding the information needs of oncology patients, the communication of bad news and their impact on the patient, and the development of guidelines on how to deliver bad news in a sensitive way.[1, 2]

The evidence indicates that patient's preferences for the type and amount of information vary. This requires physicians to adapt the information giving process to the needs and to the level of comprehension of the single patient. If the expression of such needs is not facilitated or encouraged, these needs tend to remain hidden, with the risk that the patient perceives the received information as either too much or too little. Good clinical practice entails the recognition of variations in patients' preferences, and helping patients accomplish these preferences. When we meet patients' information preferences, patients are better able to handle the information in a way that fits them best, which is associated with better quality of care, coping with illness and treatment adherence.[3]

In the last decade, the focus of many studies has been directed towards activating patients to be more involved in their treatment.[4] How the physician conducts the interview and gives information [5] has a direct effect on the participation of the patient. It has been observed that what the physician says has an immediate effect on what the patients says and therefore can also influence the degree of patient participation in the consultation.[6, 7] To stimulate patients' participation in consultations, patients were encouraged by their doctor to ask questions or advised to prepare a list of questions,[8] or to select their questions from a printed list before the consultation (question prompt sheet-QPS).[4, 9-15,17] These tools were helpful both for patients and physicians. They improved patient participation and the recall of information after the consultation. Nevertheless there is a need to replicate these studies in different cultural contexts in order to test the feasibility of such aids and to support the findings.

In Italy, during the medical consultation, patients are frequently accompanied and assisted by a companion: a close family member or another key person. In this context the activation and

1  
2  
3 involvement of the patient interacts with that of the companion key person and contributes to the  
4  
5 communication dynamics of the consultation. Olhen and colleagues[18] explored the importance of  
6  
7 significant others in therapeutic decisions and highlighted the notion of “relational autonomy”,  
8  
9 which acknowledges that people are defined by their relationships and are dependent on others in  
10  
11 making decisions.[19] Future research that analyses patients and companions as dyadic units would  
12  
13 offer further insight into the impact of social relations on treatment decision-making processes.  
14  
15 More evidence on the information needs of family members companion regarding the patient and  
16  
17 their role in the information and decision processes during the consultation is also needed.  
18  
19  
20 To our knowledge this is the first RCT in Europe which assesses the effects of a pre-consultation  
21  
22 intervention (QPS) on cancer patients’ involvement during the consultation, on their satisfaction  
23  
24 and confidence in coping with illness, and which explores the role of the family member companion  
25  
26 during the consultation.  
27  
28  
29  
30  
31

## 32 METHODS AND ANALYSIS

### 33 Study design

34  
35 This is a multicentre, randomized controlled trial in which patients are attributed randomly to the  
36  
37 intervention or to the control group on a 1:1 basis. Patients in the intervention group are given the  
38  
39 QPS, a list of 50 specific questions (see below), those in the control group are given a control sheet  
40  
41 on which to write the questions they would like to ask. The oncologists are informed about the  
42  
43 study protocol but are blinded to whether the patient is a participant of the control group or the  
44  
45 intervention group. The oncologists perform their consultation as usual, according to the clinical  
46  
47 practice of their centre. After concluding the consultation, they complete two questionnaires  
48  
49 (DPRQ-10 and CPS, see the Measures section for details) regarding the patient and the consultation.  
50  
51  
52

53 This protocol follows the CONSORT guidelines.[20]

54  
55 Standardized questionnaires are administered at baseline (before the randomization) and  
56  
57 immediately after the consultation (figure 1, table 1).  
58  
59  
60

**Figure 1** INCA Study flow diagram

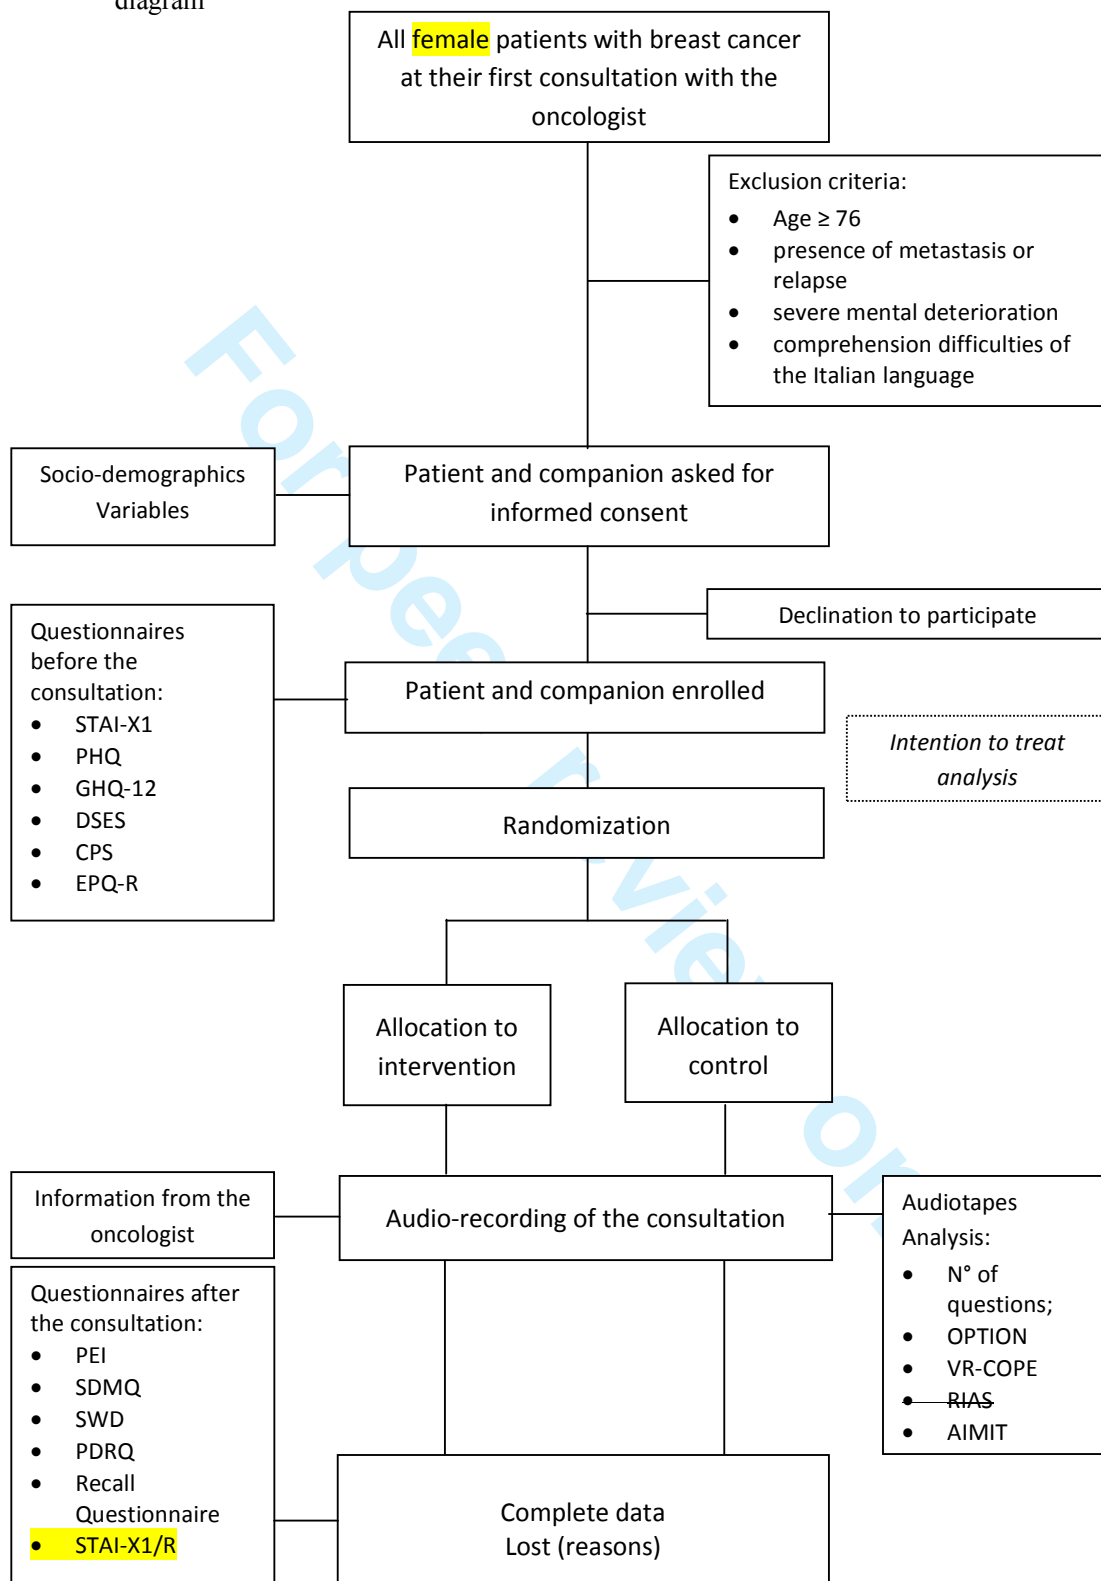

Table 1 Questionnaires and tools used in the study

| Tool                                                           | Evaluation                            | Explored area                                 | N° items                                          | Time                    |
|----------------------------------------------------------------|---------------------------------------|-----------------------------------------------|---------------------------------------------------|-------------------------|
| State-Trait Anxiety Inventory – X1 (STAI-X1)                   | Patient and companion                 | State anxiety level                           | 20                                                | Before the consultation |
| Patient Health Questionnaire – 9 (PHQ-9)                       | Patient and companion                 | Depression                                    | 9                                                 | Before                  |
| General Health Questionnaire – 12 (GHQ-12)                     | Patient and companion                 | Psychological distress                        | 12                                                | Before                  |
| Decision Self Efficacy Scale (DSES*)                           | Patient and companion                 | Confidence with decision                      | 11                                                | Before                  |
| Control Preference Scale (CPS)                                 | Patient and companion and oncologists | Role in the decision making process           | 5 vignettes Participant chooses the one preferred | Before                  |
| Eysenck Personality Questionnaire – Reduced form (EPQ-R)       | Patient and companion                 | Personality traits                            | 24                                                | Before                  |
| Doctor-Patient Scale (DP)                                      | Oncologists                           | Oncologists' communication style              | 48                                                | One time only           |
| Patient Enablement Instrument (PEI)                            | Patient and companion                 | Ability to cope with illness                  | 6                                                 | After the consultation  |
| Shared Decision Making Questionnaire (SDMQ*)                   | Patient and companion                 | Patient involvement                           | 9                                                 | After                   |
| Satisfaction With Decision scale (SWD*)                        | Patient and companion                 | Satisfaction with decision                    | 6                                                 | After                   |
| Patient-Doctor Relationship Questionnaire – 9 (PDRQ-9*)        | Patient and companion                 | Doctor-Patient relationship                   | 9                                                 | After                   |
| Recall questionnaire (RECALL*)                                 | Patient and companion                 | Recalling and understanding of information    | 10                                                | After                   |
| State-Trait Anxiety Inventory – X1/Reduced form (STAI-X1/R)    | Patient and companion                 | State anxiety level                           | 10                                                | After                   |
| Difficult Doctor-Patient Relationship Questionnaire (DDPRQ-10) | Oncologists                           | Difficulties in relationship with the patient | 12                                                | After                   |



|                                                                        |                |                                                      |                                                                               |       |
|------------------------------------------------------------------------|----------------|------------------------------------------------------|-------------------------------------------------------------------------------|-------|
| <b>Control Preference Scale (CPS)</b>                                  | Oncologists    | Patient's role in the decision making process        | 5 vignettes<br>Oncologist chooses the one supposedly preferred by the patient | After |
| <b>AUDIORECORDING</b>                                                  | Consultation   | Interaction between doctor and patient               | -                                                                             | -     |
| <b>Observing Patient Involvement in Decision Making scale (OPTION)</b> | External rater | Professional behaviours intended to involve patients | 12                                                                            | -     |
| <b>Verona Patient-centred Communication Evaluation scale (VR-COPE)</b> | External rater | Aspects of patient-centred communication             | 9                                                                             | -     |
| <b>RIAS</b>                                                            | External rater | Verbal communication                                 | 40                                                                            | -     |
| <b>Assessing Interpersonal Motivations in Transcripts (AIMIT)</b>      | External rater | Activity of interpersonal motivational systems       | Coding system applied on transcripts.                                         | -     |

\*Adapted version for companion

Time required for answering the questionnaires was approximately 15 – 20 minutes before the consultation and 10 – 15 minutes after.

### Intervention

Patients and companions (if present) of both, intervention and control group, receive a form on which to write their reply to the following request: “Please indicate the arguments issues which you want to discuss today with your oncologist”.

Patients and companions (if present) of the intervention group receive the QPS in addition to the form described above. An introduction explains the importance of asking questions during the consultations. The patient (and companion) is invited to select among a written list of about 50 possible questions those, if any, she would like to ask today to the oncologist. These questions have

1  
2  
3 been chosen and adapted on the basis of previous studies in the field [4, 9-11] and are divided by  
4  
5 topics. Questions regard diagnosis (e.g. “Of what type is my cancer?”), treatment (e.g. “Which are  
6  
7 the pros and cons of the treatment?”), contribution of patient and lifestyle (“What can I do to  
8  
9 improve the efficacy of treatment?”), prognosis (“What are the chances of relapse?”) and other  
10  
11 issues (e.g. “Do I need a referral from my GP for the next visit?”).  
12  
13

### 14 15 16 **Setting**

17  
18 Patients are being recruited from three Oncology Departments in Northern Italy: two run by  
19  
20 Hospital Trust of Verona in the Veneto region (placed in two different part of the city) and one by  
21  
22 the Hospital Trust of Brescia, in the Lombardia region.  
23

24  
25 The population of Verona city and its province in 2010 is about 914 382, the population of Brescia  
26  
27 city and its province about 1 242 923.[21] In the Veneto region the estimation of incidence of breast  
28  
29 cancer in 2010 was 4 424 new cases per year (Standardized rate adjusted for age using the European  
30  
31 population as standard (std) per 100,000= 133). In the Lombardia region the estimation of incidence  
32  
33 of breast cancer in 2010 was 7 456 new cases per year (std = 109).[22]  
34  
35

36  
37 The three Oncology departments have an out-patient clinic dedicated to breast cancer patients with  
38  
39 a rotation of 2-5 oncologists.

40  
41 Visits are scheduled on fixed days with a number of 4 - 8 patients per day. Patients have already  
42  
43 been diagnosed with cancer, have already been visited by the surgeon and undergone breast  
44  
45 operation (e.g. lumpectomy). Generally in the first visit with the oncologist the histological results  
46  
47 are communicated and further medical treatment is decided (e.g chemotherapy, hormone therapy).  
48

49  
50 The length of the visit can vary from 30 to 60 minutes.  
51  
52

### 53 54 **Sample and recruitment**

55  
56 The study sample will be composed of all consecutive **female** patients between the age of 18 to 75  
57  
58 years who attend the Oncology out-patient clinics of the participating centres and who have a recent  
59  
60

1  
2  
3 diagnosis of breast cancer at an early stage (absence of metastasis). Exclusion criteria are the  
4  
5 presence of metastasis or relapse, severe mental deterioration, comprehension difficulties of the  
6  
7 Italian language. A sample of 300 patients will be recruited, as estimated by the sample size  
8  
9 calculation (see below). Recruitment phase started in June 2011 and will continue for two years or  
10  
11 till enrolment will be completed .  
12  
13

### 14 15 16 Procedure

17  
18 Before the recruitment phase the oncologists were informed about the study and asked to  
19  
20 participate, giving a written informed consent.  
21

22  
23 All breast cancer female patients at their first out-patient visit with the oncologist of the Clinical  
24  
25 Oncology Department (and their companions if present), are being asked by a project member to  
26  
27 give written informed consent to participate in the study (figure 1).  
28

29  
30 Consenting patients and companions receive an envelope containing six questionnaires to answer  
31  
32 before the consultation (baseline assessment) (table 1). The project staff member (MAM) then  
33  
34 randomly allocates consenting patients and their companions to the intervention or control group  
35  
36 (see also paragraph “Randomization”). Another project staff member (AB, CB, IB or FC) hands out  
37  
38 the envelopes with either the intervention prompt sheet or the control sheet and collect the sheets  
39  
40 after their completion. These was done in order to keep the oncologists blind to the intervention or  
41  
42 control status.  
43  
44

45  
46 The subsequent consultation is audio recorded. After the consultation, patients and their  
47  
48 companions complete six other questionnaires. with assistance from the project member; A project  
49  
50 member is present (AB, CB, IB or FC) and provides support to the patient or to the companion if  
51  
52 they are too much troubled after the consultation.  
53

54  
55 The oncologists reports on a form the cancer stage and type, when and by whom the patient was  
56  
57 informed about diagnosis, and the therapeutic options appropriate for this patient. They also  
58  
59 complete a questionnaire measuring their perception of the patient as difficult.  
60

1  
2  
3 The audio tapes and oncologists' forms are collected by the project staff.

4  
5 The audio tapes are examined for the content and number of questions asked by patients and  
6  
7 companions, and are rated applying the OPTION scale,[23-25] which measures the extent to which  
8  
9 the oncologist has succeeded to involve the patient in the consultation. The questions that emerge  
10  
11 during the consultations are compared with those expressed before the visit. The audio recorded  
12  
13 consultations are also analyzed in terms of patient-centredness with the Roter Interaction Analysis  
14  
15 System (RIAS),[24, 25] a system for coding doctor-patient communication, with the VR-COPE  
16  
17 [26] and with the Assessment of Interpersonal Motivation in Transcripts (AIMIT) [27] which  
18  
19 evaluates the five different motivational systems that guide the verbal and non verbal behaviours  
20  
21 during interactions.  
22  
23  
24  
25  
26

## 27 **Randomization**

28  
29 The randomization sequence is being conducted off-site using the “random allocation of treatments  
30  
31 balanced in blocks (ralloc)” package for Stata[28] and is stratified by centre with a 1:1 allocation  
32  
33 ratio of treatment. Block randomization (size 4) is used to minimize large imbalances between the  
34  
35 intervention groups. The allocation sequences are generated by an independent individual, are  
36  
37 stored in computer files and remain unknown to the researchers until the patient is randomized.

38  
39 The QPS or the control sheet, chosen for the two arms of trial, are placed in opaque envelopes,  
40  
41 sealed and numbered in sequence (following the list generated by the randomization procedure) by  
42  
43 a staff member of each centre (MAM and CB), not involved in the data collection phase. Both  
44  
45 randomization procedure and treatment allocation have been developed to fully conceal treatment  
46  
47 allocation.[20, 29]  
48  
49

50  
51 Patients and oncologists are unaware of the allocation. The raters who analyze the audio- recordings  
52  
53 are also blinded to the allocation of patients.  
54  
55  
56  
57

## 58 **Study aims and hypotheses**

1  
2  
3 The study pursues different aims. The main aim is to assess if a pre consultation intervention (QPS)  
4 facilitates greater participation of female patients (and accompanying key persons when present) in  
5 the consultation process, by determining an increase in questioning and/or in the number of  
6 different illness related issues (e.g. diagnosis, treatment, prognosis) being discussed with the  
7 oncologist.  
8

9  
10  
11  
12  
13  
14 Other aims are to assess the effect of the QPS on the level of patient involvement by the  
15 oncologists, on patient satisfaction and coping, on the oncologist's perception of patient's preferred  
16 decisional role (using the CPS, more details see the measures section) and to explore the role of the  
17 companion. key persons accompanying the patient.  
18  
19  
20  
21

22  
23 In detail the study investigates if the intervention determines:

- 24 – a greater number of personal information needs expressed during the consultation (the number  
25 and type of the questions asked during the consultation);  
26  
27
- 28 – the perception of a greater capacity to cope with illness and a greater satisfaction with decisions  
29 made during the consultation (measured with the PEI and SWD; details are described in the  
30 measures section);  
31  
32
- 33 – greater patient generated and/or doctor generated involvement of the patient (using the OPTION  
34 scale and SDM-Q; details are described in the Measures section);  
35  
36
- 37 – a better understanding of the received information and greater satisfaction (measured with the  
38 Recall questionnaire and the SWD);  
39  
40
- 41 – a different perception by the oncologist of patient's preference regarding her participation in  
42 therapeutic decisions (measured with the CPS answered by the oncologist; details are described  
43 in the Measures section);  
44  
45
- 46 – a different perception by the oncologist and by the patient of the doctor-patient relationship  
47 (using the DPRQQ 9 and DPRQ-10, see measures section for the details);  
48  
49
- 50 – a more patient-centred and sharing approach during the consultation (using the VR-COPE and  
51 the AIMIT; see Measures section for the details).  
52  
53  
54  
55  
56  
57  
58  
59  
60

1  
2  
3 The potential presence of a companion during the consultation allows us to explore if the “question  
4 prompt sheet” intervention (extended to the companion) changes the companions’ role and  
5 participation during the consultation . Number and type of questions asked by the companion during  
6 the consultation are also recorded

7  
8  
9  
10  
11 Companions answer the same questionnaires as the patient: PEI for the evaluation of the ability to  
12 cope with the patients’ illness, SDM-Q for the evaluation the perceived involvement during the  
13 consultation, SWD for the satisfaction with decision, PDRQ-9 for the doctor-patient-relationship,  
14 and Recall Questionnaire for the understanding of the information received. Where necessary,  
15 questionnaires were adapted to the companions by substituting the first person (I) used in the  
16 patient version, with the third person (she). For example: “I feel confident that I can get the facts  
17 about the medication choices available to her” instead of “I feel confident that I can get the facts  
18 about the medication choices available to me” (item 1 of the DSES Scale).  
19  
20  
21  
22  
23  
24  
25  
26  
27  
28  
29  
30  
31  
32  
33

### 34 **Study measures**

#### 35 36 37 38 **Socio demographic and clinical data**

39  
40 Socio demographic data are: age, education, family status and employment status, type of  
41 relationship with the companion (if present), reported both by patients and companions during the  
42 baseline assessment.  
43  
44  
45

46  
47 Oncologists’ socio demographic data are: age, gender and years of experience. Data for oncology  
48 residents (when present during the consultation) are also obtained.  
49

50  
51 Clinical data are: cancer stage and type, duration of illness (who has informed patient on diagnosis  
52 and when), therapeutic options considered appropriate for this patient, all reported on a form by the  
53 oncologist.  
54  
55  
56  
57  
58  
59  
60

### Primary outcome measure

- The total number of patient’s questions during the consultation regarding diagnosis, prognosis, treatment, lifestyle and other issues. Question asking is considered an index of patient’s participation during the consultation. The QPS aims to increase the number of question by giving the opportunity to patients to reflect on their informative needs choosing among a wide range of possible questions those ones perceived as most relevant in view of the subsequent consultation.

### Secondary outcome measures

- The number of unmet information needs that emerge during the consultation. This measure is obtained by comparing the number of questions indicated by patients and their companion before the consultation (i.e., those selected in the QPS by patient) with those actually raised during the consultation (i.e., those identified subsequent to listening to the audio-recordings).
- Ability to cope with the illness, measured with the Patient Enablement Instrument (PEI). This questionnaire is a self-administered questionnaire of six items on a Likert scale from 0 (same or less) to 2 (much better, much more)[30]. We suppose a better ability to cope with the illness in the intervention group.
- Patient involvement, measured with the Shared Decision Making Questionnaire (SDM-Q) and the OPTION Scale. The SDM-Q is a self administered questionnaire of 9 items on a Likert scale from 1 (completely disagree) to 6 (agree completely) and assesses patients’ perception of the decisional process and their level of involvement during the consultation, the information received on therapeutic options, the potential risks and benefits regarding the participation at the decisional process.[31, 32] The OPTION Scale is composed of 12 items of operational definitions of different patient involving skills, rated on a Likert scale from 0 (behaviour absent) to 4 (behaviour observed at an excellent skill level)[23-25]. The scale is applied by trained raters to the audio recording of the consultation. In summary, it examines whether problems are well

1  
2  
3 defined, whether options are formulated, information provided, patient understanding and role  
4 preference evaluated, and decisions examined from both the professional and patient  
5 perspective. The total score ranges from 0 (0 in all items) to 48 (4 in all items) and is  
6 transformed into a 0 -100 score. We suppose a higher patient involvement during the  
7 consultation in the intervention group.  
8  
9

10  
11  
12  
13  
14 – Satisfaction with decisions made during the consultation, measured with the Satisfaction with  
15 Decision Scale (SWD). This is a self administered questionnaire of 6 items on a Likert scale  
16 from 0 (completely disagree) to 5 (agree completely) [33]. We suppose a higher patient  
17 satisfaction of patients in the intervention group.  
18  
19

20  
21  
22  
23 – Recalling and understanding of information, measured with the Recall Questionnaire. This  
24 questionnaire consists of six questions which ask the patient to recall the received information  
25 on treatment decisions and pathology (e.g. “What was the treatment decision? Which treatment  
26 options were discussed?”). The questions have been prepared for the present study with  
27 reference to previous studies.[11, 34, 35] The questionnaire allows with the help of the audio  
28 recorded consultation to evaluate patient’s correct recall and understanding by comparing  
29 patients’ reports with what was actually discussed during the consultation. We suppose that  
30 patients assigned to the intervention group can recall more precise information.  
31  
32  
33

34  
35  
36  
37 – Three other questions, rated on a 0 (no at all) to 5 (very much) Likert scale asked whether the  
38 patient succeeded in their purpose of question asking, whether the oncologist answered the  
39 questions properly and how much more information she would have needed. We suppose that  
40 patients assigned to the intervention group felt themselves more successful in question asking.  
41  
42  
43

44  
45  
46  
47 – Overall consultation atmosphere, is measured with the Verona Patient-centred Communication  
48 Evaluation scale (VR-COPE) ~~Roter Interaction Analysis System (RIAS)~~, [24, 25] and the  
49 Assessing Interpersonal Motivations in Transcripts (AIMIT).[27] VR-COPE [26] assesses the  
50 content, the process and relational aspects of patient-centred communication during medical  
51 consultations on the basis of a multidimensional evaluation and comprises nine items. Each item  
52  
53  
54  
55  
56  
57  
58  
59  
60



1  
2  
3 is defined by operational definitions and rated on a 0-10 point scale. The scale is applied by  
4  
5 trained raters on the audio-recording of the consultation. We expect that patients of the  
6  
7 intervention group establish a better relationship with their oncologist and show higher scores in  
8  
9 patient-centred communication. RIAS is a coding system of medical consultations, composed  
10  
11 by 40 categories describing task-oriented and emotion-oriented interactions between doctors and  
12  
13 patients. The system will be applied on the consultation audio-recording by trained raters.[24,  
14  
15 25] AIMIT[27] is a coding system applied on transcripts aiming to systematically detect the  
16  
17 activity of interpersonal motivational systems. Systems identified are five (attachment,  
18  
19 caregiving, rank, sexuality, peer cooperation) and they guide the verbal and non verbal  
20  
21 behaviours during interactions. We suppose that patients of the intervention group evidence a  
22  
23 more cooperative style during the consultation.  
24  
25  
26

- 27 – Perceived Patient-doctor relationship, measured with the Patient – Doctor Relationship  
28  
29 Questionnaire (PDRQ-9) and the Difficult Doctor Patient Relationship Questionnaire (DDPRQ-  
30  
31 10). PDRQ-9 is a self-administered questionnaire of 9 items on a Likert scale from 1 (not at all  
32  
33 appropriate) to 5 (totally appropriate), to measure the relationship between the doctor and the  
34  
35 patient, from a patient point of view.[36] The DDPRQ-10 (is a self-report instrument of 10  
36  
37 items on a Likert scale from 1 (not at all) to 6 (a great deal), is completed by physicians after the  
38  
39 encounter with a patient.[37, 38] The questionnaire identifies the patients experienced as  
40  
41 difficult patients. We suppose that the doctor-patient relationship in the intervention group is  
42  
43 perceived as less difficult.  
44  
45  
46
- 47 – Oncologists answered three questions on the potential presence of anxiety, depression or  
48  
49 emotional distress in the patient and a fourth on their difficulty experienced in answering the  
50  
51 patient's questions. Answering questions of patients in the intervention group should be  
52  
53 perceived by oncologists as less difficult.  
54  
55
- 56 – Perceived role preference of the patient, measured with the Control Preference Scale (CPS,  
57  
58 Oncologist version) [39, 40]. This scale assesses how the oncologist perceives the role that  
59  
60

1  
2  
3 patient might prefer regarding the decision making process. Oncologists should be better able to  
4  
5 identify patients preferred role in the intervention group.  
6

7 – Duration of the consultation, measured in minutes. We suppose a longer duration of the  
8  
9 consultation in the intervention group.  
10

### 11 12 13 14 **Process related and potential confounding variables**

15  
16 The measures below have been collected in order to check their possible influence on question  
17  
18 asking (primary outcome).  
19

20  
21 – Anxiety, depression and general well-being, measured with the State Anxiety Inventory (STAI-  
22  
23 X1, XR),[41-43] the Patient Health Questionnaire depression scale (PHQ-9) [44-46] and the  
24  
25 General Health Questionnaire (GHQ-12) [47].  
26

27 STAI-X1 is a self-administered questionnaire of 20 items on a Likert scale from 1 (not at all) to  
28  
29 4 (very much) completed before the consultation. Higher total scores indicate greater state  
30  
31 anxiety. The STAI-X1R, administered after the consultation, is a shorter version of ten out of  
32  
33 the twenty items of the STAI-X1, and it is used to evaluate the state anxiety level at the end of  
34  
35 the consultation and to compare this level with the one measured at the beginning. PHQ-9 is a  
36  
37 self-assessment questionnaire for detecting the presence of depression and consists of 9 items  
38  
39 with response options of 0 (not at all) to 3 (almost every day), and has a summative score range  
40  
41 of 0 to 27. We score it in the standard way, using the sum of the 0–3 scores for each item, and  
42  
43  $\geq 8$  as a cut-score for possible cases of depression [44-46]. GHQ-12 is a self administrated  
44  
45 questionnaire of 12 items and has a summative score range of 0 to 12 and a cut-score of  $>3$   
46  
47 indicating psychological distress.[47]  
48  
49

50  
51 – Personality traits, measured with the Eysenck Personality Questionnaire (EPQR-S) [48]. The  
52  
53 EPQR-S is a self-administered questionnaire of 48 items on yes/no scale. For our study we use  
54  
55 two subscales: the Extraversion/Introversion (12 items) and Neuroticism/Stability (12 items).  
56  
57 The “Extroversion” is characterized by being outgoing, talkative, high on positive affect (feeling  
58  
59  
60

1  
2  
3 good) and in need of external stimulation. The “Neuroticism” or emotionality is characterized  
4  
5 by high levels of negative affect such as depression and anxiety.  
6

- 7 – Confidence with decision, measured with the Decision Self Efficacy Scale (DSES).[49] This  
8 self- administered questionnaire for patients consists of 11 items on a Likert scale from 0 (not at  
9 all confident) to 4 (very confident).  
10
- 11 – Patients’ and their companion’s preference for the role they want to have in the decision making  
12 process, measured with the Control Preference Scale (CPS) [39, 40]. This self-administered  
13 instrument contains 5 vignettes with text, depicting different patient roles (from active to  
14 passive) from which patients choose the one considered as most appropriate for them.  
15
- 16 – Patient-centred communication style and attitude toward the doctor-patient relationship,  
17 measured with the Doctor-Patient (DP) Scale [50]. The Scale measures the degree of  
18 oncologists’ self reported patient or doctor-centred communication style and attitude. It consists  
19 of 48 statements to rate on a Likert scale from 1 (strong agreement) to 5 (strong disagreement).  
20 It has a summative score range of 48 to 240. The scale is completed by all oncologists who join  
21 the study.  
22  
23  
24  
25  
26  
27  
28  
29  
30  
31  
32  
33  
34  
35  
36  
37

### 38 **Sample size calculation**

39  
40 A sample of 300 patients will be recruited. This number has been estimated to account for  
41 approximately a 15% of withdrawal rate, so that 250-260 patients will complete the study, with  
42 about 130 patients in each arm. The primary outcome measure is the number of patient questions.  
43  
44 The international literature reports a mean number of nine questions (range 0-53) for breast cancer  
45 patients. Since such data are not available in the Italian context, an observational phase was  
46 conducted. We recruited a sample of 30 patients (10 for each centre) with the same characteristics,  
47  
48 in order to assess the number and type of questions asked by the patient during the consultation, to  
49 understand the ongoing interaction between oncologists and patients in a first encounter and to test  
50 the feasibility of procedures and questionnaires. This observational study resulted in a mean number  
51  
52  
53  
54  
55  
56  
57  
58  
59  
60

1  
2  
3 of 18 (sd=13) patient questions asked during a first encounter with the oncologist. An intervention  
4 intended to increase the number of questions might be considered efficacious with an increase of  
5 30%. The sample size required to evidence such difference was calculated using the sampsi  
6 command of Stata 11,[51] assuming a power of 80% and a two-sided significant level of 5% on a  
7 student t-test for differences between independent groups.[52, 53]  
8  
9  
10  
11  
12

### 13 14 15 16 **Statistical analysis**

17  
18 The data will be analyzed according to intention-to-treat principle. [54] Standard statistical  
19 techniques will be used to describe characteristics of patients in both groups, and CONSORT flow  
20 diagram will be shown in order to explain the phases of trial and inform on the findings  
21 confidence.[20] The primary outcome, significant increase of patient questions, will be compared in  
22 the two arms using t-test. If adjustment for possible baseline differences among patients (as well as  
23 for oncologists and centres) is needed, an analysis of covariance will be done. Regarding secondary  
24 outcome measures, multilevel analyses will be used to taking into account the specific effect of the  
25 individual oncologist.[55] ~~Regarding the analyses of the audio recordings, additional techniques to  
26 study the doctor patient interaction at a micro level will be used, such as sequence analyses which  
27 study the probabilistic links between subsequent physician and patient turns.[8, 56, 57]~~  
28  
29  
30  
31  
32  
33  
34  
35  
36  
37  
38  
39  
40  
41  
42

### 43 **EXPECTED ACHIEVEMENT**

44  
45 The involvement and participation of patients in therapeutic programs is of great interest not only to  
46 physicians but to all health professionals engaged in improving patients' adherence to treatment  
47 regimens or operating in the field of health promotion.  
48  
49

50  
51 We expect that **female** patients who have the opportunity to rehearse their information needs before  
52 the consultation will ask a greater number of questions which in turn will determine their greater  
53 involvement by the physician and a greater number of satisfied needs. We also expect that the  
54 straightforward use of a list of printed questions of potential relevance for cancer patients and their  
55  
56  
57  
58  
59  
60

1  
2  
3 companions at an early stage of illness, by modifying the process of information exchange, will  
4  
5 increase their participation and satisfaction with the consultation, with potential benefits for  
6  
7 treatment adherence and consequently treatment efficacy. The use of a question prompt sheet might  
8  
9 be a simple and quick device in improving the overall communication between oncologist and  
10  
11 patient. It might be routinely used before the consultation and also brought into the consultation and  
12  
13 discussed with the oncologist to further increase patient and companion participation. Evidence  
14  
15 demonstrates that efficacious communication positively influences the understanding and  
16  
17 satisfaction of the patient, treatment adherence and health status. Moreover, the oncologist's  
18  
19 knowledge and consideration of the information needs of the ~~family members or other key persons~~  
20  
21 ~~close to the patient~~ companions who in Italy are often present may further facilitate patient's  
22  
23 participation in the therapeutic program.  
24  
25  
26  
27  
28

## 29 **DISCUSSION**

30  
31 It has been demonstrate in English speaking countries that the Question Prompt sheet is an useful  
32  
33 tool to improve patient's participation during the consultation. There is a need to explore the effect  
34  
35 of a Question Prompt Sheet during oncological consultation also in other countries. To our  
36  
37 knowledge there are no published RCTs in Europe which assess the effects of a pre-consultation  
38  
39 intervention and explore the role and the effect of the companion as well. The study has a strong  
40  
41 design that incorporates computerised random allocation, blinding of data-collection staff and the  
42  
43 use of measures on the audio recordings. The analysis of the consultation recordings is a valuable  
44  
45 research method and is a recommended tool for documenting the interaction between patients and  
46  
47 oncologists. [56]  
48  
49

50  
51 There are some limitations to consider. The QPS was collected prior to the consultation, while in  
52  
53 previous trials reported in literature [4,10-15], patients were allowed to bring the QPS into the  
54  
55 consultation to refer to. Patients in our study therefore might not remember all selected questions  
56  
57 and ask less questions, by this undermining the hypothesis of the greater participation of the QPS  
58  
59  
60

1  
2  
3 intervention group. On the other hand, in our study oncologists are kept blind to the intervention or  
4 control status of the patients and are not forced to change their routine clinical  
5 approach to the consultation. Once the study will be completed we will discuss the findings with the  
6 oncologists and we hope that afterwards the QPS can be used routinely in their practice.  
7  
8 The findings from this study will provide a basis for further research in the field and provide  
9 potentially important results for clinicians, patients and policy makers that may lead to a wider use  
10 of QPS also in other context.  
11  
12  
13  
14  
15  
16  
17  
18  
19

## 20 ETHICS AND DISSEMINATION PLANS

21  
22 The study was approved by the local Ethics Committees of the Hospital Trust of Verona. The study  
23 is registered at ClinicalTrial.gov (identifier: NCT01510964). This protocol follows the CONSORT  
24 guidelines.[20]  
25  
26  
27  
28

29 Recruitment phase started in June 2011 and will continue till the enrolment will be completed and is  
30 expected to be closed in May 2013. Analysis will start after data monitoring and checking is  
31 completed. The dissemination of the trial findings will principally be carried out through  
32 publications in peer-review journal and presentations at national/international conferences focused  
33 on cancer and/or communication, for examples European Association for Communication in Health  
34 Care Conferences and International Shared Decision Making Conferences.  
35  
36  
37  
38  
39  
40  
41  
42  
43  
44

## 45 FUNDING

46 This research received no specific grant from any funding agency in the public, commercial or not-  
47 for-profit sectors.  
48  
49  
50

## 51 COMPETING INTERESTS

52 The authors declared that they have no competing interest.  
53  
54  
55  
56  
57  
58  
59  
60

## AUTHORS' CONTRIBUTIONS

CG, LDP, MR, CZ developed the study protocol and together with AG and MGS supervised the all procedures. MAM is the trial statistician and is responsible for generating the randomization sequences and providing guidance on statistical analysis of trial data. MB is the computer scientist that developed the database to save the data. CG drafted the manuscript, will oversee enrolment and data collection. GD, AB, FC, CB, IB, AM, EF, RN, CC, SZ, AA, FM, ELS, FR participated in enrolling the patients. All authors saw and approved the final version of the manuscript.

## REFERENCES

1. Buckman R. *Breaking bad news: a guide for healthcare professionals*. Baltimore, MD: John Hopkins University Press 1992.
2. Baile WF, Buckman R, Lenzi R, et al. AP. SPIKES - A six-step protocol for delivering bad news: Application to the patient with cancer. *Oncologist* 2000;**5**:302-311.
3. Joosten EAG, DeFuentes-Merilla L, de Weert GH, Sensky T, et al. Systematic review of the effects of shared decision making on patient satisfaction, treatment adherence and health status. *Psychother Psychosom* 2008;**77**:219-226.
4. Clayton JM, Butow PN, Tattersall MH, et al. Randomized controlled trial of a prompt list to help advanced cancer patients and their caregivers to ask questions about prognosis and end-of-life care. *J Clin Oncol* 2007;**25**:715-723.
5. Charles C, Gafni A, Whelan T. How to improve communication between doctors and patients. Learning more about the decision making context is important. *BMJ* 2000;**320**:1220-1221.
6. Drew P, Chatwin J, Collins S. Conversation analysis: a method for research into interactions between patients and health-care professionals. *Health Expectat* 2001;**4**:58-70.

- 1  
2  
3 7. Zimmermann C, Del Piccolo L, Mazzi MA. Patient cues and medical interviewing in general  
4 practice. Examples of the application of sequential analysis. *Epidemiol Psychiatr Soc*  
5 2003;**12**:115-123.  
6  
7
- 8  
9 8. Kidd J, Marteau TM, Robinson S, et al. Promoting patient participation in consultations: a  
10 randomized controlled trial to evaluate the effectiveness of three patient-focused  
11 interventions. *Patient Educ Couns* 2004;**52**:107-12.  
12  
13
- 14 9. Butow PN, Dunn SM, Tattersall MHN, et al. Patient participation in the cancer consultation:  
15 evaluation of a question prompt sheet. *Ann Oncol* 1994;**5**:199-204.  
16  
17
- 18 10. Brown R, Butow PN, Boyer MJ, et al. Promoting patient participation in the cancer  
19 consultation: evaluation of a prompt sheet and coaching in question-asking. *Br J Cancer*  
20 1999;**80**:242-248.  
21  
22
- 23 11. Brown RF, Butow PN, Dunn SM, et al. Promoting patient participation and shortening cancer  
24 consultations: a randomised trial. *Br J Cancer* 2001;**8**:1273-1279.  
25  
26
- 27 12. Bruera E, Sweeney C, Willey J, et al. Breast cancer patient perception of the helpfulness of a  
28 prompt sheet versus a general information sheet during outpatient consultation: a randomized  
29 controlled trial. *J Pain Symptom Manage* 2003;**5**:412-419.  
30  
31
- 32 13. Glynne-Jones R, Ostler P, Lumley-Graybow S, et al. Can I look at my list? An evaluation of a  
33 'prompt sheet' within an oncology outpatient clinic. *Clin Oncol* 2006;**18**:395-400.  
34  
35
- 36 14. Clayton J, Butow P, Tattersall M, et al. Asking questions can help: development and  
37 preliminary evaluation of a question prompt list for palliative care patients. *Br J Cancer*  
38 2003;**89**:2069-2077.  
39  
40
- 41 15. Clayton JM, Butow PN, Tattersall MH, et al. Randomized controlled trial of a prompt list to  
42 help advanced cancer patients and their caregivers to ask questions about prognosis and end-  
43 of-life care. *J Clin Oncol* 2007;**25**:715-723.  
44  
45  
46  
47  
48  
49  
50  
51  
52  
53  
54  
55  
56  
57  
58  
59  
60



- 1  
2  
3 16. Van der Meulen N, Jansen J, van Dulmen S, et al. Interventions to improve recall of medical  
4  
5 information in cancer patients: a systematic review of the literature. *Psychooncology*  
6  
7 2008;**17**:857-68.
- 8  
9  
10 17. Van Weert JC, Jansen J, Spreeuwenberg PM, et al. Effects of communication skills training  
11  
12 and a Question Prompt Sheet to improve communication with older cancer patients: a  
13  
14 randomized controlled trial. *Crit Rev Oncol Hematol* 2011;**80**:145-59.
- 15  
16 18. Ohlen J, Balneaves L, Bottorff J, et al. The influence of significant others in complementary  
17  
18 and alternative medicine decisions by cancer patients. *Soc Sci Med* 2006;**63**:1625–1636.
- 19  
20 19. Christman J. Relational autonomy, liberal individualism, and the social constitution of selves.  
21  
22 *Philosophical Studies* 2004;**117**:143–164.
- 23  
24 20. Moher D, Hopewell S, Schulz KF, et al. CONSORT 2010 explanation and elaboration:  
25  
26 updated guidelines for reporting parallel group randomized trials. *BMJ* 2010;**340**:c869. DOI:  
27  
28 10.1136/bmj.c869.
- 29  
30 21. Istituto Nazionale di Statistica (ISTAT) Web site.  
31  
32 <http://www.demo.istat.it/pop2010/index.html>. Accessed October 24, 2012.
- 33  
34 22. Centro Nazionale di Epidemiologia, Sorveglianza e Promozione della Salute - Istituto  
35  
36 Superiore di Sanità (ISS) Web site. [http://www.tumori.net/it3/banca\\_dati/query.php](http://www.tumori.net/it3/banca_dati/query.php). Accessed  
37  
38 October 24, 2012.
- 39  
40 23. Elwyn G, Hutchings H, Edwards A, et al. The OPTION scale: measuring the extent that  
41  
42 clinicians involve patients in decision-making tasks. *Health Expectat* 2005;**8**:34-42.
- 43  
44 24. Goss C, Fontanesi S, Mazzi MA, et al. The assessment of patient involvement across  
45  
46 consultation. The Italian version of the OPTION scale (in Italian). *Epidemiol Psichiatr Soc*  
47  
48 2007;**16**:339-349.
- 49  
50 25. Goss C, Fontanesi S, Mazzi MA, et al. Shared decision making: the reliability of the OPTION  
51  
52 scale in Italy. *Pat Educ Counsel* 2007;**66**:296-302.
- 53  
54  
55  
56  
57  
58  
59  
60

- 1  
2  
3 Roter D, Larson S. The Roter interaction analysis system (RIAS): utility and flexibility for  
4 analysis of medical interactions. *Pat Educ Counsel* 2002;**26**:243-251.  
5  
6  
7  
8 Roter D. The Roter method of interaction process analysis. RIAS manual. Baltimore, MD:  
9 John Hopkins University Press 1991.  
10  
11  
12  
13  
14 26. Del Piccolo L, Mazzi MA, Scardoni S, et al. A theory based proposal to evaluate patient-  
15 centred communication in medical consultations: the Verona Patient-centred Communication  
16 Evaluation scale (VR-COPE). *Health Education* 2008;**108**:355-372.  
17  
18  
19  
20  
21 27. Ardevini C, Cotugno A, Costantini E, et al. Il manuale AIMIT. Analisi degli Indicatori delle  
22 Motivazioni Interpersonali nei Trascritti. In: Liotti G, Monticelli F. I sistemi motivazionali nel  
23 dialogo clinico. Il manuale AIMIT. Milano, IT: Raffaello Cortina editore 2008. Fassone G,  
24 Valcella F, Pallini S, et al. Assessment of Interpersonal Motivation in Transcripts (AIMIT):  
25 an inter- and intra-rater reliability study of a new method of detection of interpersonal  
26 motivational systems in psychotherapy. *Clin Psychol Psychother* 2012;**19**: 224-34.  
27  
28  
29  
30  
31  
32  
33  
34 28. Ryan P. sxd1 4: Random allocation of treatments in blocks. *Stata Journal* 2008;**8**:146.  
35  
36  
37 29. Altman DG, Schulz KF, Moher D, et al. The revised CONSORT statement for reporting  
38 randomized trials: explanation and elaboration. *Ann Intern Med* 2001;**134**:663-94.  
39  
40  
41 30. Howie JG, Heaney DJ, Maxwell M, et al. A comparison of a Patient Enablement Instrument  
42 (PEI) against two established satisfaction scales as an outcome measure of primary care  
43 consultations. *Fam Pract* 1998;**15**:165-171.  
44  
45  
46  
47 31. Simon D, Chorr G, Wirtz M, et al. Development and first validation of the shared decision  
48 making questionnaire (SDM-Q). *Pat Educ Counsel* 2006;**63**:319-327.  
49  
50  
51  
52 32. Kriston L, Scholl I, Hölzel L, et al. The 9-item Shared Decision Making Questionnaire (SDM-  
53 Q-9). Development and psychometric properties in a primary care sample. *Patient Educ*  
54 *Couns.* 2010;**80**:94-9.  
55  
56  
57  
58  
59  
60

- 1
- 2
- 3 33. Holmes-Rovner M, Kroll J, Schmitt N, et al. Patient satisfaction with health care decisions:
- 4 the Satisfaction with Decision Scale. *Med Decis Making* 1996;**16**:58-64.
- 5
- 6
- 7 34. Gattellari M, Voigt KJ, Butow PN, et al. When the treatment goal is not cure: are cancer
- 8 patients equipped to make informed decisions? *J Clin Oncol* 2002;**20**:503-513.
- 9
- 10
- 11 35. Whelan T, Levine M, Gafni A, et al. Mastectomy or lumpectomy? Helping women make
- 12 informed choices. *J Clin Oncol* 1999;**17**:1727-1735.
- 13
- 14
- 15 36. Van der Feltz-Cornelis CM, Van Oppen P, Van Marwijk HWJ, et al. A patient-doctor
- 16 relationship questionnaire (PDRQ-9) in primary care: development and psychometric
- 17 evaluation. *Gen Hosp Psychiatry* 2004;**26**:115-120.
- 18
- 19
- 20 37. Hahn SR, Thompson KS, Wills TA, et al. The difficult doctor-patient relationship:
- 21 somatization, personality and psychopathology. *J Clin Epidemiol* 1994;**47**:647-57.
- 22
- 23 38. Hahn SR, Kroenke K, Spitzer RL, et al. The difficult patient: prevalence, psychopathology,
- 24 and functional impairment. *J Gen Intern Med* 1996;**11**:1-8.
- 25
- 26
- 27 39. Degner LF, Sloan JA, Venkatesh P. The Control Preferences Scale. *Can J Nurs Res*
- 28 1997;**29**:21-43.
- 29
- 30
- 31 40. Giordano A, Mattarozzi K, Pucci E, et al. Participation in medical decision-making: attitudes
- 32 of Italians with multiple sclerosis. *J Neurol Sci* 2008;**275**:86-91.
- 33
- 34
- 35 41. Spielberger CD. Anxiety as an emotional state. (Vol. 1). New York: Academic Press 1972.
- 36
- 37 42. Spielberger CD, Gorsuch RL, Lushene R, et al. Manual for the State-Trait Anxiety Inventory.
- 38 Palo Alto, CA: Consulting Psychologists Press 1983.
- 39
- 40 43. Lazzari R, Pancheri P. S.T.A.I. Questionario di autovalutazione dell'ansia di stato e di tratto.
- 41 Firenze, IT: Organizzazioni Speciali 1980.
- 42
- 43 44. Kroenke K, Spitzer RL, Williams JB. The PHQ-9: validity of a brief depression severity
- 44 measure. *J Gen Intern Med* 2001;**16**:606-13.
- 45
- 46 45. Kroenke K, Streine TW, Spitzer RL, et al. The PHQ-8 as a measure of current depression in
- 47 general population. *J Affect Disord* 2009;**114**:163-173.
- 48
- 49
- 50
- 51
- 52
- 53
- 54
- 55
- 56
- 57
- 58
- 59
- 60

- 1  
2  
3 46. Thekkumpurath P, Walker J, Butcher I, et al. Screening for major depression in cancer  
4 outpatients: the diagnostic accuracy of the 9-item patient health questionnaire. *Cancer*  
5 2011;**117**:218-227.  
6  
7  
8  
9  
10 47. Politi PL, Piccinelli M, Wilkinson G. Reliability, validity and factor structure of the 12-item  
11 General Health Questionnaire among young males in Italy. *Acta Psychiatr Scand*  
12 1994;**90**:432-437.  
13  
14  
15  
16 48. Eysenck SBG, Eysenck HJ, Barrett P. A revised version of the psychoticism scale.  
17 *Personality and Individual Differences* 1985;**6**:21-29.  
18  
19  
20 49. O'Connor AM. User Manual-Decision Self-Efficacy Scale. Patient Decision Aids, Ottawa  
21 Hospital Research Institute (OHIR) Web site.  
22 [http://decisionaid.ohri.ca/docs/develop/User\\_Manuals/UM\\_Decision\\_SelfEfficacy.pdf](http://decisionaid.ohri.ca/docs/develop/User_Manuals/UM_Decision_SelfEfficacy.pdf).  
23  
24  
25  
26  
27 Accessed October 24, 2012.  
28  
29  
30 50. De Monchy C, Richardson R, Brown RA, et al. Measuring attitudes of doctors: the doctor-  
31 patient (DP) rating. *Med Educ* 1988;**22**:231-239.  
32  
33  
34 51. StataCorp. Stata Statistical Software: Release 11.2. College Station, TX: StataCorp LP 2011.  
35  
36  
37 52. Pocock SJ. Clinical trials: A practical approach. New York: John Wiley & Sons 1983.  
38  
39 53. Sullivan LM, D'Agostino RB. Robustness and power of analysis of covariance applied to  
40 ordinal scaled data as arising in randomized controlled trials. *Stat Med* 2003;**22**:1317-1334  
41  
42  
43 54. Little R, Yau L. Intent-to-treat analysis for longitudinal studies with drop-outs. *Biometrics*  
44 1996;**52**:1324-1333.  
45  
46  
47 55. Skrondal A, Rabe-Hesketh S. Generalized latent variable modelling: Multilevel, longitudinal,  
48 and structural equation models. New York: Chapman & Hall/CRC 2004.  
49  
50  
51 ~~Mazzi MA, Del Piccolo L, Zimmermann C. Event based categorical sequential analyses of the~~  
52 ~~medical interview: a review. *Epidemiol Psychiatr Soc* 2003;**12**:81-85.~~  
53  
54 ~~Goss C, Mazzi MA, Del Piccolo L, et al. Information giving sequences in general practice~~  
55 ~~consultations. *J Eval Clin Pract* 2005;**11**:339-349.~~  
56  
57  
58  
59  
60

1  
2  
3  
4  
5  
6  
7  
8  
9  
10  
11  
12  
13  
14  
15  
16  
17  
18  
19  
20  
21  
22  
23  
24  
25  
26  
27  
28  
29  
30  
31  
32  
33  
34  
35  
36  
37  
38  
39  
40  
41  
42  
43  
44  
45  
46  
47  
48  
49  
50  
51  
52  
53  
54  
55  
56  
57  
58  
59  
60

56. Tattersall MHN, Butow PN. Consultation audio tapes: an underused cancer patient information aid and clinical research tool. *Lancet Oncol* 2002;3:431-437.

For peer review only



**The INvolvement of breast CANcer patients during  
oncological consultations. A multi-centre randomized  
controlled trial. The INCA study protocol.**

|                                    |                                                                                                                                                                                                                                                                                                                                                                                                                                                                                                                                                                                                                                                                                                                                                                                                                                                                                                                                                                                                                                                                                    |
|------------------------------------|------------------------------------------------------------------------------------------------------------------------------------------------------------------------------------------------------------------------------------------------------------------------------------------------------------------------------------------------------------------------------------------------------------------------------------------------------------------------------------------------------------------------------------------------------------------------------------------------------------------------------------------------------------------------------------------------------------------------------------------------------------------------------------------------------------------------------------------------------------------------------------------------------------------------------------------------------------------------------------------------------------------------------------------------------------------------------------|
| Journal:                           | <i>BMJ Open</i>                                                                                                                                                                                                                                                                                                                                                                                                                                                                                                                                                                                                                                                                                                                                                                                                                                                                                                                                                                                                                                                                    |
| Manuscript ID:                     | bmjopen-2012-002266.R2                                                                                                                                                                                                                                                                                                                                                                                                                                                                                                                                                                                                                                                                                                                                                                                                                                                                                                                                                                                                                                                             |
| Article Type:                      | Protocol                                                                                                                                                                                                                                                                                                                                                                                                                                                                                                                                                                                                                                                                                                                                                                                                                                                                                                                                                                                                                                                                           |
| Date Submitted by the Author:      | 11-Feb-2013                                                                                                                                                                                                                                                                                                                                                                                                                                                                                                                                                                                                                                                                                                                                                                                                                                                                                                                                                                                                                                                                        |
| Complete List of Authors:          | Goss, Claudia; University of Verona<br>Ghilardi, Alberto; University of Brescia,<br>Deledda, giuseppe; University of Verona,<br>Buizza, Chiara; University of Brescia,<br>Bottacini, Alessandro; University of Verona,<br>Del Piccolo, Lidia; University of Verona,<br>Rimondini, Michela; University of Verona,<br>Chiodera, Federica; University of Verona,<br>Mazzi, Maria Angela; University of Verona,<br>Ballarin, Mario; University of Verona,<br>Bighelli, Irene; University of Verona,<br>Strepparava, Maria Grazia; University of Milano-Bicocca,<br>Molino, Annamaria; Hospital Trust, Verona,<br>Fiorio, Elena; Hospital Trust, Verona,<br>Nortilli, Rolando; Hospital Trust, Verona,<br>Caliolo, Chiara; Hospital Trust, Verona,<br>Zuliani, Serena; Hospital Trust, Verona,<br>Auriemma, Alessandra; Hospital Trust, Verona,<br>Maspero, Federica; Hospital Trust, Verona,<br>Simoncini, Edda; Spedali Civili, Brescia,<br>Ragni, Fulvio; Spedali Civili, Brescia,<br>Brown, Richard; Vrginia Commonwealth University,<br>Zimmermann, Christa; University of Verona, |
| <b>Primary Subject<br>Heading</b>: | Oncology                                                                                                                                                                                                                                                                                                                                                                                                                                                                                                                                                                                                                                                                                                                                                                                                                                                                                                                                                                                                                                                                           |
| Secondary Subject Heading:         | Patient-centred medicine                                                                                                                                                                                                                                                                                                                                                                                                                                                                                                                                                                                                                                                                                                                                                                                                                                                                                                                                                                                                                                                           |
| Keywords:                          | patient involvement, breast cancer, docotr-pateint communication                                                                                                                                                                                                                                                                                                                                                                                                                                                                                                                                                                                                                                                                                                                                                                                                                                                                                                                                                                                                                   |
|                                    |                                                                                                                                                                                                                                                                                                                                                                                                                                                                                                                                                                                                                                                                                                                                                                                                                                                                                                                                                                                                                                                                                    |

SCHOLARONE™  
Manuscripts

1  
2  
3 **The INvolvement of breast CANcer patients during oncological consultations. A multi-centre**  
4 **randomized controlled trial. The INCA study protocol.**  
5  
6  
7  
8

9 Claudia Goss<sup>\*1</sup>, Alberto Ghilardi<sup>2</sup>, Giuseppe Deledda<sup>1</sup>, Chiara Buizza<sup>2</sup>, Alessandro Bottacini<sup>1</sup>, Lidia Del Piccolo<sup>1</sup>,  
10 Michela Rimondini<sup>1</sup>, Federica Chiodera<sup>1</sup>, Maria Angela Mazzi<sup>1</sup>, Mario Ballarin<sup>1</sup>, Irene Bighelli<sup>1</sup>, Maria Grazia  
11 Strepparava<sup>3</sup>, Annamaria Molino<sup>4</sup>, Elena Fiorio<sup>4</sup>, Rolando Nortilli<sup>5</sup>, Chiara Caliolio<sup>5</sup>, Serena Zuliani<sup>5</sup>, Alessandra  
12 Auremma<sup>5</sup>, Federica Maspero<sup>5</sup>, Edda Lucia Simoncini<sup>6</sup>, Fulvio Ragni<sup>7</sup>, Richard Brown<sup>8</sup>, Christa Zimmermann<sup>1</sup>  
13  
14  
15  
16  
17  
18

19 <sup>1</sup> Department of Public Health and Community Medicine, Section of Clinical Psychology, University of Verona, Italy

20 <sup>2</sup> Department of Childcare and Biomedical Technologies, Section of Clinical and Dynamic Psychology, Faculty of Medicine and  
21 Surgery, University of Brescia, Italy  
22

23 <sup>3</sup> Department of Experimental Medicine, Section of Clinical Psychology, Faculty of Medicine and Surgery, University of Milano-  
24 Bicocca, Italy  
25

26 <sup>4</sup> O.U. of Oncology d.O., Ospedale Civile Maggiore, Hospital Trust of Verona , Italy  
27

28 <sup>5</sup> O.U. of Oncology, Policlinico G. Rossi, Hospital Trust of Verona, Italy  
29

30 <sup>6</sup> Medical Oncology, Spedali Civili, Brescia, Italy  
31

32 <sup>7</sup> General Surgery 2, Spedali Civili, Brescia, Italy  
33

34 <sup>8</sup> Department of Social and Behavioral Health, School of Medicine, Virginia Commonwealth University, Richmond, VA, USA  
35  
36  
37

38 \*Corresponding author  
39

40 Department of Public Health and Community Medicine  
41

42 University of Verona  
43

44 Policlinico G.B. Rossi, P.le L.A. Scuro 10, 37134 Verona, Italy  
45

46 Tel +39 045 8124441  
47

48 Fax +39 045 8027498  
49

50 Email addresses: claudia.goss@univr.it  
51  
52

53 *Word count:4549*  
54  
55  
56  
57

58 *Key- word:* patient involvement, breast cancer, doctor-patient communication  
59  
60

## ABSTRACT

**Introduction:** Studies on patient involvement show that physicians make few attempts to involve their patients who ask few questions if not facilitated. On the other hand, patients who participate in the decision making process show greater treatment adherence and have better health outcomes. Different methods to encourage the active participation during oncological consultation have been described, however similar studies in Italy are lacking. The aims of the present study are to 1) assess the effects of a pre-consultation intervention to increase involvement of breast cancer patients during the consultation, and 2) explore the role of attending-companions in the information exchange during the consultation.

**Methods and analysis:** All female patients with breast cancer who attend the Oncology Out-patient Services for the first time will provide informed consent to participate in the study. They are randomly assigned to the intervention or to the control group.

The intervention consists of the presentation of a list of relevant illness-related questions, called a question prompt-sheet (QPS).

The primary outcome measure of the efficacy of the intervention is the number of questions asked by patients during the consultation. Secondary outcomes are: the involvement of the patient by the oncologist; the patient's perceived achievement of her information needs; the patient's satisfaction and ability to cope, the quality of the doctor-patient relationship in terms of patient-centeredness and the number of questions asked by the companions and their involvement during the consultation. All outcome measures are supposed to significantly increase in the intervention group.

**Ethics and Dissemination:** The study was approved by the local Ethics Committee of the Hospital Trust of Verona. Study findings will be disseminated through peer-reviewed publications and conference presentations.

**Trial registration:** ClinicalTrials.gov identifier: NCT01510964



## ARTICLE SUMMARY

### Article focus

- This article assesses if a pre consultation intervention (QPS) facilitates greater participation of patients (and attending companions when present) in the consultation process, by determining an increase in questioning and/or in the number of different illness related issues (e.g. diagnosis, treatment, prognosis) being discussed with the oncologist.
- This article assesses the effect of the QPS on the level of patient involvement by the oncologists, on patient satisfaction and coping, on the oncologist's perception of patient's preferred decisional role and to explore the role of the companion.

### Key messages

- The involvement and participation of patients in therapeutic programs is of great interest not only to physicians but to all health professionals engaged in improving patients' adherence to treatment regimens or operating in the field of health promotion.
- We expect that patients who have the opportunity to rehearse their information needs before the consultation will ask a greater number of questions which in turn will determine their greater involvement by the physician and a greater number of satisfied needs.
- We also expect that the straightforward use of a list of printed questions of potential relevance for cancer patients and their companions at an early stage of illness, by modifying the process of information exchange, will increase their participation and satisfaction with the consultation, with potential benefits for treatment adherence and consequently treatment efficacy.

### Strengths and limitations of this study

- To our knowledge this is the first RCT in Europe which assesses the effects of QPS on cancer patients' involvement during the consultation, on their satisfaction and confidence in coping with illness, and which explores the role of the companion during the consultation.
- QPS in this study is administered before the consultation and collected by the researcher and not available to the patient during the consultation. Thus patients may not remember their questions

1  
2  
3 selected on the QPS and undermine the hypothesis of the greater participation of the QPS  
4  
5 intervention group.  
6  
7  
8  
9  
10  
11  
12  
13  
14  
15  
16  
17  
18  
19  
20  
21  
22  
23  
24  
25  
26  
27  
28  
29  
30  
31  
32  
33  
34  
35  
36  
37  
38  
39  
40  
41  
42  
43  
44  
45  
46  
47  
48  
49  
50  
51  
52  
53  
54  
55  
56  
57  
58  
59  
60

For peer review only

## INTRODUCTION

In recent years the interest in communication issues in cancer care has steadily increased, in particular regarding the information needs of oncology patients, the communication of bad news and the impact of such news on patients, and the development of guidelines on how clinicians can deliver bad news in a sensitive way. [1, 2]

Research evidence suggests that patients have varying preferences for the amount and type of information they desire.[3] Good clinical practice entails oncologists recognizing these variations in patient preferences, and physicians and patients working together to accomplish these preferences.

In order to accommodate these varying preferences physicians need elicit patient preferences and to adapt their information giving process to meet these needs. If the expression of such needs is not facilitated or encouraged, these needs tend to remain hidden, consequently patients may perceive that they received too much or too little information. The literature suggests that better quality of patient care and patient outcomes such as coping with illness and treatment adherence are achieved when preferences being met. [4] How the physician conducts the interview and gives information [5] has a direct effect on the participation of the patient. It has been observed that what the physician says has an immediate effect on what the patients says and therefore can also influence the degree of patient participation in the consultation.[6, 7] One proven method to encourage patients to be more active communicators is to provide a Question Prompt Sheets (QPS). [8- 16] QPS are structures lists of prepared questions that prompt patients to consider novel topics before a consultation and decide on question they would like to ask during the consultation. These tools have been shown to increase patient activation during the consultation and aid recall of information after the consultation. Although QPS have been shown to be helpful there is a need to replicate these studies in different cultural contexts in order to test the feasibility of such aids and to support the findings.

In Italy, during the medical consultation, patients are frequently accompanied and assisted by a companion: a close family member or another key person. In this context the activation and

1  
2  
3 involvement of the patient interacts with that of the companion and contributes to the  
4 communication dynamics of the consultation. Olhen and colleagues [18] explored the importance of  
5 significant others in therapeutic decisions and highlighted the notion of “relational autonomy”,  
6 which acknowledges that people are defined by their relationships and are dependent on others in  
7 making decisions. [19] Future research that analyses patients and companions as dyadic units would  
8 offer further insight into the impact of social relations on treatment decision-making processes.  
9 More evidence on the information needs of companions regarding the patient and their role in the  
10 information and decision processes during the consultation is also needed.

11  
12 To our knowledge this is the first RCT in Europe which assesses the effects of a pre-consultation  
13 intervention (QPS) on cancer patients’ involvement during the consultation, on their satisfaction  
14 and confidence in coping with illness, and which explores the role of the companion during the  
15 consultation.

## 16 17 18 19 20 21 22 23 24 25 26 27 28 29 30 31 **METHODS AND ANALYSIS**

### 32 **Study design**

33  
34 This is a multicentre, randomized controlled trial in which patients are attributed randomly to the  
35 intervention or to the control group on a 1:1 basis. Patients in the intervention group are given the  
36 QPS, a list of 50 specific questions (see below); those in the control group are given a control sheet  
37 on which to write the questions they would like to ask. The oncologists are informed about the  
38 study protocol but are blinded to whether the patient is a participant of the control group or the  
39 intervention group. The oncologists perform their consultation as usual, according to the clinical  
40 practice of their centre. After concluding the consultation, they complete two questionnaires  
41 (DPRQ-10 and CPS, see the Measures section for details) regarding the patient and the consultation.

42  
43 This protocol follows the CONSORT guidelines. [20]

44  
45 Standardized questionnaires are administered at baseline (before the randomization) and  
46 immediately after the consultation (figure 1, table 1).  
47  
48  
49  
50  
51  
52  
53  
54  
55  
56  
57  
58  
59  
60

1  
2  
3  
4  
5  
6  
7  
8  
9  
10  
11  
12  
13  
14  
15  
16  
17  
18  
19  
20  
21  
22  
23  
24  
25  
26  
27  
28  
29  
30  
31  
32  
33  
34  
35  
36  
37  
38  
39  
40  
41  
42  
43  
44  
45  
46  
47  
48  
49  
50  
51  
52  
53  
54  
55  
56  
57  
58  
59  
60

**Figure 1** INCA Study flow diagram

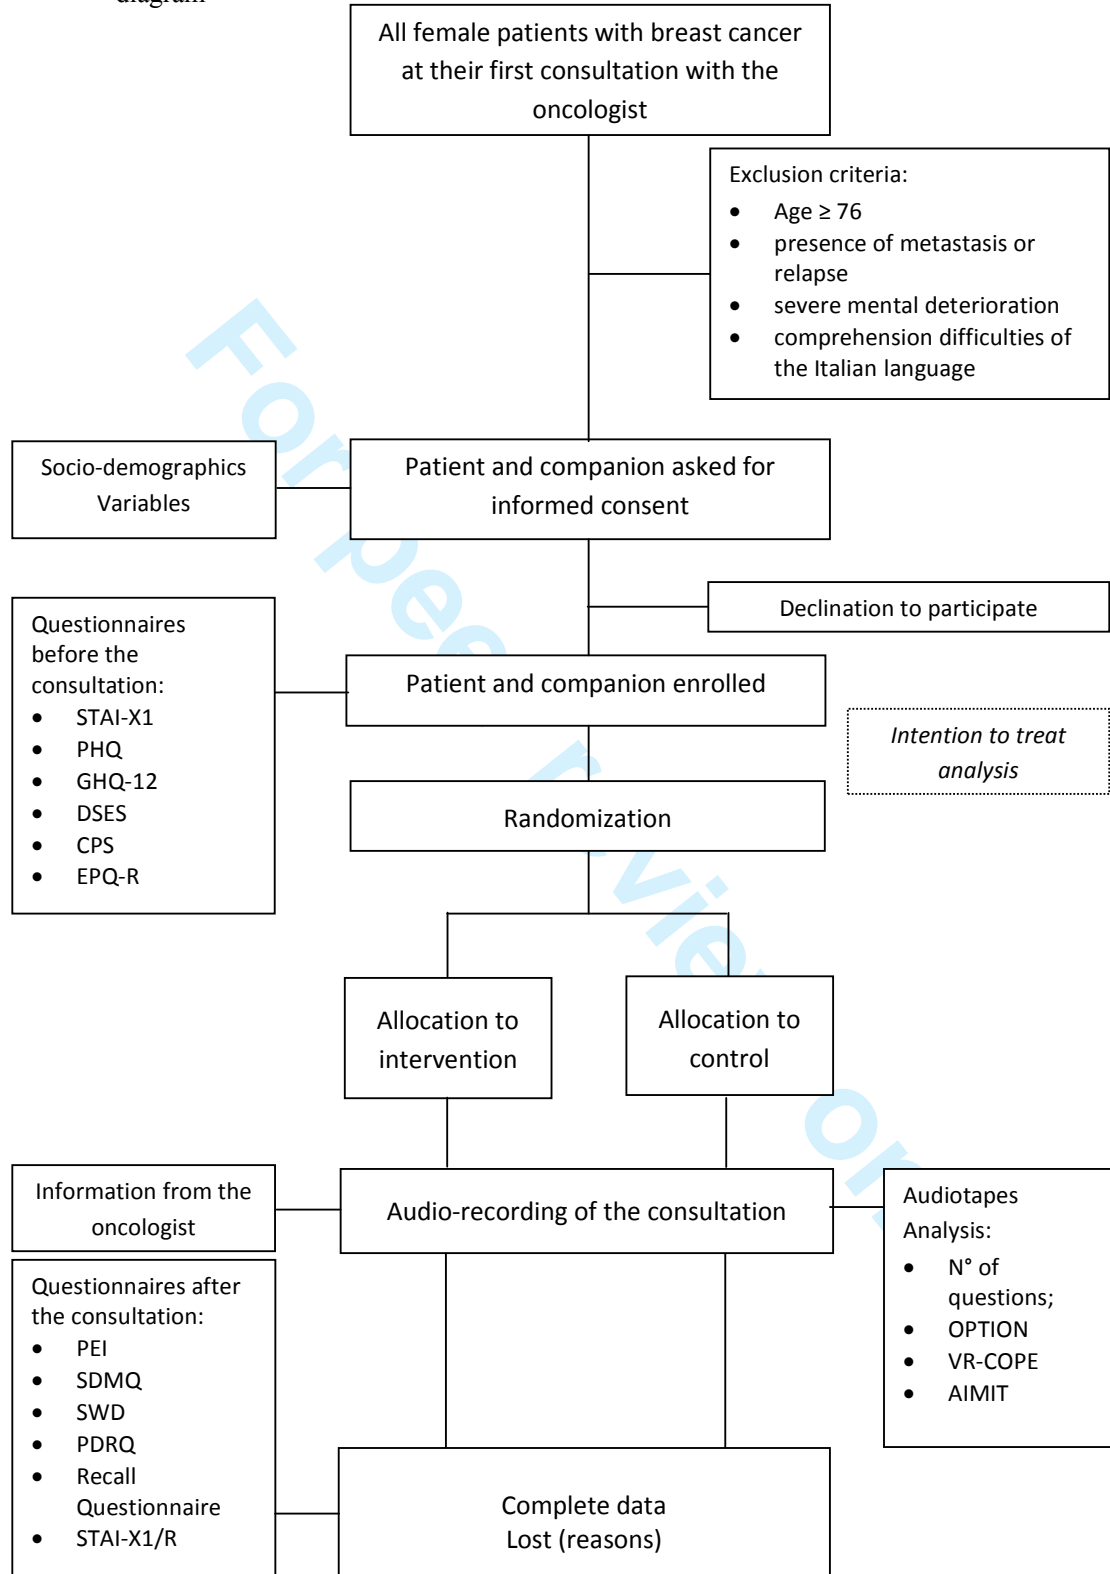

Table 1 Questionnaires and tools used in the study

| Tool                                                                  | Evaluation            | Explored area                                 | N° items                                             | Time                    |
|-----------------------------------------------------------------------|-----------------------|-----------------------------------------------|------------------------------------------------------|-------------------------|
| <b>State-Trait Anxiety Inventory – X1 (STAI-X1)</b>                   | Patient and companion | State anxiety level                           | 20                                                   | Before the consultation |
| <b>Patient Health Questionnaire – 9 (PHQ-9)</b>                       | Patient and companion | Depression                                    | 9                                                    | Before                  |
| <b>General Health Questionnaire – 12 (GHQ-12)</b>                     | Patient and companion | Psychological distress                        | 12                                                   | Before                  |
| <b>Decision Self Efficacy Scale (DSES*)</b>                           | Patient and companion | Confidence with decision                      | 11                                                   | Before                  |
| <b>Control Preference Scale (CPS)</b>                                 | Patient and companion | Role in the decision making process           | 5 vignettes<br>Participant chooses the one preferred | Before                  |
| <b>Eysenck Personality Questionnaire – Reduced form (EPQ-R)</b>       | Patient and companion | Personality traits                            | 24                                                   | Before                  |
| <b>Doctor-Patient Scale (DP)</b>                                      | Oncologists           | Oncologists' communication style              | 48                                                   | One time only           |
| <b>Patient Enablement Instrument (PEI)</b>                            | Patient and companion | Ability to cope with illness                  | 6                                                    | After the consultation  |
| <b>Shared Decision Making Questionnaire (SDMQ*)</b>                   | Patient and companion | Patient involvement                           | 9                                                    | After                   |
| <b>Satisfaction With Decision scale (SWD*)</b>                        | Patient and companion | Satisfaction with decision                    | 6                                                    | After                   |
| <b>Patient-Doctor Relationship Questionnaire – 9 (PDRQ-9*)</b>        | Patient and companion | Doctor-Patient relationship                   | 9                                                    | After                   |
| <b>Recall questionnaire (RECALL*)</b>                                 | Patient and companion | Recalling and understanding of information    | 10                                                   | After                   |
| <b>State-Trait Anxiety Inventory – X1/Reduced form (STAI-X1/R)</b>    | Patient and companion | State anxiety level                           | 10                                                   | After                   |
| <b>Difficult Doctor-Patient Relationship Questionnaire (DDPRQ-10)</b> | Oncologists           | Difficulties in relationship with the patient | 12                                                   | After                   |

|                                                                        |                |                                                      |                                                                               |       |
|------------------------------------------------------------------------|----------------|------------------------------------------------------|-------------------------------------------------------------------------------|-------|
| <b>Control Preference Scale (CPS)</b>                                  | Oncologists    | Patient's role in the decision making process        | 5 vignettes<br>Oncologist chooses the one supposedly preferred by the patient | After |
| <b>AUDIORECORDING</b>                                                  | Consultation   | Interaction between doctor and patient               | -                                                                             | -     |
| <b>Observing Patient Involvement in Decision Making scale (OPTION)</b> | External rater | Professional behaviours intended to involve patients | 12                                                                            | -     |
| <b>Verona Patient-centred Communication Evaluation scale (VR-COPE)</b> | External rater | Aspects of patient-centred communication             | 9                                                                             | -     |
| <b>Assessing Interpersonal Motivations in Transcripts (AIMIT)</b>      | External rater | Activity of interpersonal motivational systems       | Coding system applied on transcripts.                                         | -     |

\*Adapted version for companion

Time required to answer the pre consultation questionnaire is approximately 15 – 20 minutes while the post consultation questionnaire takes between 10 – 15 minutes to complete.

### Intervention

Patients and companions (if present) of both, intervention and control group, receive a form on which to write their reply to the following request: "Please indicate the issues which you want to discuss today with your oncologist".

Patients and companions (if present) randomized to the intervention group receive the QPS in addition to the form described above. An introduction explains the importance of asking questions during the consultations. The patient (and companion) are invited to select and circle salient questions, if any, from the 50 questions included in the QPS. These questions have been chosen and adapted on the basis of previous studies in the field [ 8-16] and are divided by topics. Questions regard diagnosis (e.g. "Of what type is my cancer?"), treatment (e.g. "Which are the pros and cons

1  
2  
3 of the treatment?), contribution of patient and lifestyle (“What can I do to improve the efficacy of  
4 treatment?”), prognosis (“What are the chances of relapse?”) and other issues (e.g. “Do I need a  
5 referral from my GP for the next visit?”).  
6  
7  
8  
9

## 10 11 **Setting**

12  
13  
14 The patient recruitment phase of this protocol has begun at three Oncology Departments in  
15 Northern Italy: two run by Hospital Trust of Verona in the Veneto region (placed in two different  
16 part of the city) and one by the Hospital Trust of Brescia, in the Lombardia region. The recruitment  
17 phase started in June 2011 and will continue for two years or until the sample size has been reached.  
18  
19  
20 The population of Verona city and its province in 2010 is about 914 382, the population of Brescia  
21 city and its province about 1 242 923. [21] In the Veneto region the estimation of incidence of  
22 breast cancer in 2010 was 4 424 new cases per year (Standardized rate adjusted for age using the  
23 European population as standard (std) per 100,000= 133). In the Lombardia region the estimation of  
24 incidence of breast cancer in 2010 was 7 456 new cases per year (std = 109). [22]  
25  
26  
27  
28  
29  
30  
31  
32  
33

34 The three Oncology departments each have out-patient clinics dedicated to breast cancer patients  
35 with a rotation of 2-5 oncologists. New medical oncology patient appointment are scheduled on  
36 fixed days with a number of 4 - 8 patients per day. Generally in the first visit with the oncologist the  
37 histological results are communicated and further medical treatment is decided (e.g chemotherapy,  
38 hormone therapy). The length of the visit can vary from 30 to 60 minutes.  
39  
40  
41  
42  
43  
44  
45  
46

## 47 **Sample and recruitment**

48  
49 The study sample is composed of consecutive female patients between the age of 18 to 75 years  
50 who attend the Oncology out-patient clinics of the participating centres and who have a recent  
51 diagnosis of breast cancer at an early stage (absence of metastasis). Eligible patients have already  
52 undergone breast surgery (e.g. lumpectomy). Exclusion criteria are the presence of metastasis or  
53  
54  
55  
56  
57  
58  
59  
60



1  
2  
3 relapse, severe mental deterioration, comprehension difficulties of the Italian language. A sample of  
4  
5 300 patients will be recruited, as estimated by the sample size calculation (see below).  
6  
7

### 8 9 **Procedure**

10 Before the patient recruitment phase the oncologists were informed about the study and invited to  
11  
12 participate. Willing oncologist provided written informed consent.  
13

14  
15 Eligible patients attending their first out-patient visit with the oncologist (and their companions if  
16  
17 present), are provided with information about the study by a project member who are available to  
18  
19 answer any questions. Willing patients provide written informed consent to participate in the study  
20  
21 (figure 1).  
22  
23

24  
25 Once consented patients and companions receive an envelope containing six questionnaires to  
26  
27 answer before the consultation (baseline assessment) (table 1). The project staff member (MAM)  
28  
29 then randomly allocates consenting patients and their companions to the intervention or control  
30  
31 group (see also paragraph “Randomization”). Another project staff member (AB, CB, IB or FC)  
32  
33 hands out the envelopes with either the intervention QPS or the control sheet and collect the sheets  
34  
35 after their completion. In order to keep the oncologists blind to the intervention or control status  
36  
37 patients do not take the QPS into the consultation.  
38  
39

40  
41 The subsequent consultation is audio recorded. After the consultation, patients and their  
42  
43 companions complete a further six questionnaires. In the event that a patient or companion is  
44  
45 distressed after the consultation trained project member is present (AB, CB, IB or FC) and provides  
46  
47 support.  
48

49  
50 At the completion of the consultation the oncologists completes a medical details sheet that asks  
51  
52 about the cancer stage and type, when and by whom the patient was informed about diagnosis, and  
53  
54 the therapeutic options appropriate for this patient. They also complete a questionnaire measuring  
55  
56 their perception of the patient as difficult.  
57

58  
59 The audio tapes and oncologists’ forms are collected by the project staff.  
60

1  
2  
3 The audio tapes are examined for the content and number of questions asked by patients and  
4 companions, and are rated applying the OPTION scale, [23-25] which measures the extent to which  
5 the oncologist has succeeded to involve the patient in the consultation. The questions that emerge  
6 during the consultations are compared with those expressed before the visit. The audio recorded  
7 consultations are also analyzed in terms of patient-centredness with the VR-COPE [26] and with the  
8 Assessment of Interpersonal Motivation in Transcripts (AIMIT) [27] which evaluates the five  
9 different motivational systems that guide the verbal and non verbal behaviours during interactions.  
10  
11  
12  
13  
14  
15  
16  
17  
18  
19

### 20 **Randomization**

21  
22 The randomization sequence is conducted off-site using the “random allocation of treatments  
23 balanced in blocks (ralloc)” package for Stata [28] and is stratified by centre with a 1:1 allocation  
24 ratio of treatment. Block randomization (size 4) is used to minimize large imbalances between the  
25 intervention groups. The allocation sequences are generated by an independent individual, are  
26 stored in computer files and remain unknown to the researchers until the patient is randomized.  
27  
28  
29  
30  
31  
32  
33

34 The QPS or the control sheet, chosen for the two arms of trial, are placed in opaque envelopes,  
35 sealed and numbered in sequence (following the list generated by the randomization procedure) by  
36 a staff member of each centre (MAM and CB), not involved in the data collection phase. Both  
37 randomization procedure and treatment allocation have been developed to fully conceal treatment  
38 allocation. [20, 29]  
39  
40  
41  
42  
43  
44

45 Patients and oncologists are unaware of the allocation. The raters who analyze the audio- recordings  
46 are also blinded to the allocation of patients.  
47  
48  
49

### 50 **Study aims and hypotheses**

51  
52 The main aim is to assess if a pre consultation intervention (QPS) facilitates greater participation of  
53 patients in the consultation process, by determining an increase in questioning and/or in the number  
54  
55  
56  
57  
58  
59  
60

1  
2  
3 of different illness related issues (e.g. diagnosis, treatment, prognosis) being discussed with the  
4  
5 oncologist.

6  
7 Other aims are to assess the effect of the QPS on the level of patient involvement by the  
8  
9 oncologists, on patient satisfaction and coping, on the oncologist's perception of patient's preferred  
10  
11 decisional role (using the CPS, more details see the measures section) and to explore the role of the  
12  
13 companion.  
14

15  
16 In detail the study investigates if the intervention determines:

- 17  
18 – a greater number of personal information needs expressed during the consultation (the number  
19  
20 and type of the questions asked during the consultation);
- 21  
22 – the perception of a greater capacity to cope with illness and a greater satisfaction with decisions  
23  
24 made during the consultation (measured with the PEI and SWD; details are described in the  
25  
26 measures section);
- 27  
28 – greater patient generated and/or doctor generated involvement of the patient (using the OPTION  
29  
30 scale and SDM-Q; details are described in the Measures section);
- 31  
32 – a better understanding of the received information and greater satisfaction (measured with the  
33  
34 Recall questionnaire and the SWD);
- 35  
36 – a more accurate identification by the oncologist of patients' preferred role in the therapeutic  
37  
38 decisions (measured with the CPS answered by the oncologist; details are described in the  
39  
40 Measures section);
- 41  
42 – a more supportive doctor-patient relationship perceived by the oncologist's and patient's (using  
43  
44 the PDRQ -9 and DDPQR-10, see measures section for the details);
- 45  
46 – a more patient-centred and sharing approach during the consultation (using the VR-COPE and  
47  
48 the AIMIT; see Measures section for the details).
- 49  
50  
51  
52

53  
54 Extending the QPS to the patient's companion (if present) allows us to explore the impact of the  
55  
56 QPS on the companions' role and participation during the consultation. The number and type of  
57  
58 questions asked by the companion during the consultation are recorded  
59  
60

1  
2  
3 Companions answer the same questionnaires as the patient: PEI for the evaluation of the ability to  
4 cope with the patients' illness, SDM-Q for the evaluation the perceived involvement during the  
5 consultation, SWD for the satisfaction with decision, PDRQ-9 for the doctor-patient-relationship,  
6 and Recall Questionnaire for the understanding of the information received. Where necessary,  
7 questionnaires were adapted to the companions by substituting the first person (I) used in the patient  
8 version, with the third person (she).For example: "I feel confident that I can get the facts about the  
9 medication choices available to her" instead of "I feel confident that I can get the facts about the  
10 medication choices available to me" (item 1 of the DSES Scale).  
11  
12  
13  
14  
15  
16  
17  
18  
19  
20  
21  
22

## 23 **Study measures**

### 24 25 26 27 **Socio demographic and clinical data**

28  
29 Socio demographic data collected from patients are: age, education, family status and employment  
30 status, type of relationship with the companion (if present), reported both by patients and  
31 companions during the baseline assessment.  
32  
33  
34

35  
36 Oncologists' socio demographic data are: age, gender and years of experience. Data for oncology  
37 residents (when present during the consultation) are also obtained.  
38  
39

40  
41 Clinical data are: cancer stage and type, duration of illness (who has informed patient on diagnosis  
42 and when), therapeutic options considered appropriate for this patient, all reported on a form by the  
43 oncologist.  
44  
45  
46  
47  
48

### 49 **Primary outcome measure**

50  
51 The total number of patient's questions during the consultation regarding diagnosis, prognosis,  
52 treatment, lifestyle and other issues. Question asking is considered an index of patient's  
53 participation during the consultation. The QPS aims to increase the number of question by giving  
54 the opportunity to patients to reflect on their informative needs choosing among a wide range of  
55  
56  
57  
58  
59  
60

possible questions those ones perceived as most relevant in view of the subsequent consultation. We hypothesize that patients who are randomized to receive the QPS will ask more questions than patients randomized to the control group.

### Secondary outcome measures

- The number of unmet information needs that emerge during the consultation. This measure is obtained by comparing the number of questions indicated by patients and their companion before the consultation (i.e., those selected in the QPS by patient) with those actually raised during the consultation (i.e., those identified subsequent to listening to the audio-recordings).
- Ability to cope with the illness, measured with the Patient Enablement Instrument (PEI). This questionnaire is a self-administered questionnaire of six items on a Likert scale from 0 (same or less) to 2 (much better, much more) [30]. We hypothesize that patients randomized to the intervention group will have higher “coping with illness” scores compared to patients in the control group.
- Patient involvement, measured with the Shared Decision Making Questionnaire (SDM-Q) and the OPTION Scale. The SDM-Q is a self administered questionnaire of 9 items on a Likert scale from 1 (completely disagree) to 6 (agree completely) that assesses patients’ perception of the decisional process and their level of involvement during the consultation, the information received on therapeutic options, the potential risks and benefits regarding the participation at the decisional process.[31, 32] The OPTION Scale is composed of 12 items of operational definitions of different patient involving skills, rated on a Likert scale from 0 (behaviour absent) to 4 (behaviour observed at an excellent skill level) [23-25]. The scale is applied by trained raters to the audio recording of the consultation. In summary, it examines whether problems are well defined, whether options are formulated, information provided, patient understanding and role preference evaluated, and decisions examined from both the professional and patient perspective. The total score ranges from 0 (0 in all items) to 48 (4 in all items) and is

1  
2  
3 transformed into a 0 -100 score. We hypothesize that patients randomized to the intervention  
4  
5 group will have higher patient involvement during the consultation compared to patients in the  
6  
7 control group.

- 8  
9  
10 – Satisfaction with decisions made during the consultation, measured with the Satisfaction with  
11  
12 Decision Scale (SWD). This is a self-report questionnaire of 6 items on a Likert scale from 0  
13  
14 (completely disagree) to 5 (agree completely) [33]. We hypothesize that patients randomized to  
15  
16 the intervention group will have higher patient satisfaction compared to patients in the control  
17  
18 group.
- 19  
20 – Recalling and understanding of information, measured with the Recall Questionnaire. This  
21  
22 questionnaire consists of six items that ask the patient to recall the received information on  
23  
24 treatment decisions and pathology (e.g. “What was the treatment decision? Which treatment  
25  
26 options were discussed?”). The questions have been prepared for the present study with  
27  
28 reference to previous studies.[11, 34, 35] The questionnaire enables an evaluation of the  
29  
30 accuracy of patient’s recall and understanding of information delivered during the consultation  
31  
32 by comparing the patients’ answers with the contents of the actual consultation discussion  
33  
34 gathered from the consultation audiorecording. We hypothesize that patients randomized to the  
35  
36 intervention group will recall more precise information compared to patients in the control  
37  
38 group.
- 39  
40 – Three other questions, rated on a 0 (no at all) to 5 (very much) Likert scale asked whether the  
41  
42 patient asked their selected QPS questions, whether the oncologist answered the questions and  
43  
44 whether the patient received the information they desired. We hypothesize that patients  
45  
46 randomized to the intervention group will feel themselves more successful in question asking.  
47  
48 compared to patients in the control group.
- 49  
50 – Overall consultation atmosphere, is measured with the Verona Patient-centred Communication  
51  
52 Evaluation scale (VR-COPE) and the Assessing Interpersonal Motivations in Transcripts  
53  
54 (AIMIT). [27] The VR-COPE [26] assesses the content, the process and relational aspects of  
55  
56  
57  
58  
59  
60

1  
2  
3 patient-centred communication during medical consultations on the basis of a multidimensional  
4  
5 evaluation and comprises nine items. Each item is defined by operational definitions and rated  
6  
7 on a 0-10 point scale. The scale is applied by trained raters to the consultation audio-recordings  
8  
9 We expect that patients of the intervention group establish a better relationship with their  
10  
11 oncologist and show higher scores in patient-centred communication.  
12

13  
14 The AIMIT [27] is a coding system applied to transcripts that systematically detects the activity  
15  
16 of five interpersonal motivational systems (attachment, caregiving, rank, sexuality,  
17  
18 cooperation). We hypothesize that patients randomized to the intervention group will more  
19  
20 often evidence a cooperative style during the consultation compared to patients in the control  
21  
22 group.  
23

- 24  
25 – Perceived Patient-doctor relationship, measured with the Patient – Doctor Relationship  
26  
27 Questionnaire (PDRQ-9) and the Difficult Doctor Patient Relationship Questionnaire (DDPRQ-  
28  
29 10). The PDRQ-9 contains 9 items on a Likert scale with anchors at 1 (not at all appropriate) to  
30  
31 5 (totally appropriate). The scale measures patient perceptions of their relationship with the  
32  
33 doctor.[36] The DDPRQ-10 contains 10 items on a Likert scale anchors at 1 (not at all) to 6 (a  
34  
35 great deal) and is completed by physicians after the encounter with a patient.[37, 38] The  
36  
37 questionnaire identifies the patients experienced as difficult patients. We hypothesize that the  
38  
39 doctor-patient relationship in the intervention group is perceived as less difficult compared to  
40  
41 the control group.  
42  
43
- 44  
45 – Oncologists answered three questions on the potential presence of anxiety, depression or  
46  
47 emotional distress in the patient and a fourth on their difficulty experienced in answering the  
48  
49 patient's questions. We hypothesize that answering questions of patients in the intervention  
50  
51 group will be perceived by oncologists as less difficult.  
52  
53
- 54  
55 – Perceived role preference of the patient, measured with the Control Preference Scale (CPS,  
56  
57 Oncologist version) [39, 40]. This scale assesses how the oncologist perceives the role that  
58  
59  
60

1  
2  
3 patient might prefer regarding the decision making process. Oncologists should be better able to  
4 identify patients preferred role in the intervention group.  
5

- 6  
7 – Duration of the consultation, measured in minutes. We hypothesize a longer duration of the  
8 consultation in the intervention group compared to the control group.  
9  
10

### 11 12 13 14 15 16 **Process related and potential confounding variables**

17 The measures below have been collected in order to check their possible influence on question  
18 asking (primary outcome).  
19

- 20  
21 – Anxiety, depression and general well-being, measured with the State Anxiety Inventory (STAI-  
22 X1, XR), [41-43] the Patient Health Questionnaire depression scale (PHQ-9) [44-46] and the  
23 General Health Questionnaire (GHQ-12) [47].  
24  
25

26 STAI-X1 is a self-administered questionnaire of 20 items on a Likert scale from 1 (not at all) to  
27 4 (very much) completed before the consultation. Higher total scores indicate greater state  
28 anxiety. The STAI-X1R, administered after the consultation, is a shorter version of ten out of  
29 the twenty items of the STAI-X1, and it is used to evaluate the state anxiety level at the end of  
30 the consultation and to compare this level with the one measured at the beginning. PHQ-9 is a  
31 self-assessment questionnaire for detecting the presence of depression and consists of 9 items  
32 with response options of 0 (not at all) to 3 (almost every day), and has a summative score range  
33 of 0 to 27. We score it in the standard way, using the sum of the 0–3 scores for each item, and  
34  $\geq 8$  as a cut-score for possible cases of depression [44-46]. GHQ-12 is a self administrated  
35 questionnaire of 12 items and has a summative score range of 0 to 12 and a cut-score of  $>3$   
36 indicating psychological distress. [47]  
37  
38

- 39 – Personality traits, measured with the Eysenck Personality Questionnaire (EPQR-S) [48]. The  
40 EPQR-S is a self-administered questionnaire of 48 items on yes/no scale. For our study we use  
41 two subscales: the Extraversion/Introversion (12 items) and Neuroticism/Stability (12 items).  
42  
43  
44  
45  
46  
47  
48  
49  
50  
51  
52  
53  
54  
55  
56  
57  
58  
59  
60



1  
2  
3 The “Extroversion” is characterized by being outgoing, talkative, high on positive affect (feeling  
4 good) and in need of external stimulation. The “Neuroticism” or emotionality is characterized  
5 by high levels of negative affect such as depression and anxiety.  
6  
7

- 8  
9  
10 – Confidence with decision, measured with the Decision Self Efficacy Scale (DSES). [49] This  
11 self- administered questionnaire for patients consists of 11 items on a Likert scale from 0 (not at  
12 all confident) to 4 (very confident).  
13  
14  
15 – Patients’ and their companion’s preference for the role they want to have in the decision making  
16 process, measured with the Control Preference Scale (CPS) [39, 40]. This self-administered  
17 instrument contains 5 vignettes with text, depicting different patient roles (from active to  
18 passive) from which patients choose the one considered as most appropriate for them.  
19  
20  
21 – Patient-centred communication style and attitude toward the doctor-patient relationship,  
22 measured with the Doctor-Patient (DP) Scale [50]. The Scale measures the degree of  
23 oncologists’ self reported patient or doctor-centred communication style and attitude. It consists  
24 of 48 statements to rate on a Likert scale from 1 (strong agreement) to 5 (strong disagreement).  
25  
26 It has a summative score range of 48 to 240. The scale is completed by all oncologists who join  
27 the study.  
28  
29  
30  
31  
32  
33  
34  
35  
36  
37  
38  
39

#### 40 **Sample size calculation**

41  
42 A sample of 300 patients will be recruited. This number has been estimated to account for  
43 approximately a 15% of withdrawal rate, so that 250-260 patients will complete the study, with  
44 about 130 patients in each arm. The primary outcome measure is the number of patient questions.  
45  
46 The international literature reports a mean number of nine questions (range 0-53) for breast cancer  
47 patients. Since such data are not available in the Italian context, an observational phase was  
48 conducted. We recruited a sample of 30 patients (10 for each centre) with the same characteristics,  
49  
50 in order to assess the number and type of questions asked by the patient during the consultation, to  
51 understand the ongoing interaction between oncologists and patients in a first encounter and to test  
52  
53  
54  
55  
56  
57  
58  
59  
60

1  
2  
3 the feasibility of procedures and questionnaires. This observational study resulted in a mean number  
4  
5 of 18 (sd=13) patient questions asked during a first encounter with the oncologist; no significant  
6  
7 difference was found between the three centres (median test:  $\chi^2=2.4$ ,  $p=0.30$ ).  
8

9  
10 An intervention intended to increase the number of questions might be considered efficacious with  
11  
12 an increase of 30%. The sample size required to evidence such difference was calculated using the  
13  
14 `sampsi` command of Stata 11, [51] assuming a power of 80% and a two-sided significant level of  
15  
16 5% on a student t-test for differences between independent groups. [52, 53]  
17  
18  
19

### 20 21 **Statistical analysis**

22  
23 The data will be analyzed according to intention-to-treat principle. [54] Standard statistical  
24  
25 techniques will be used to describe characteristics of patients in both groups, and CONSORT flow  
26  
27 diagram will be shown in order to explain the phases of trial and inform on the findings confidence.  
28  
29 [20] The primary outcome, significant increase of patient questions, will be compared in the two  
30  
31 arms using t-test. If adjustment for possible baseline differences among patients (as well as for  
32  
33 oncologists and centres) is needed, an analysis of covariance will be done. Regarding secondary  
34  
35 outcome measures, multilevel analyses will be used to taking into account the specific effect of the  
36  
37 individual oncologist. [55]  
38  
39  
40  
41  
42

### 43 **EXPECTED ACHIEVEMENT**

44  
45 The involvement and participation of patients in therapeutic programs is of great interest not only to  
46  
47 physicians but to all health professionals engaged in improving patients' adherence to treatment  
48  
49 regimens or operating in the field of health promotion.  
50

51  
52 We expect that patients who have the opportunity to rehearse their information needs before the  
53  
54 consultation will ask a greater number of questions and we will observe higher levels of  
55  
56 involvement by the physician and a higher number of met information needs. The use of a simple  
57  
58 question prompt sheet may improve the overall communication between oncologist and patient.  
59  
60

1  
2  
3 This intervention will be easy to disseminate and use in routine clinical practice to increase patient  
4 and companion participation.  
5  
6  
7  
8

## 9 10 **DISCUSSION**

11 It has been demonstrated in English speaking countries that a QPS is a useful tool to improve  
12 patient's participation during the consultation. However, we contend that consultation  
13 communication may vary across cultures and thus there is a need to explore the efficacy of a QPS in  
14 Non English speaking countries to explore cross cultural differences. To our knowledge there are  
15 no published randomized controlled trials in Europe that assess the effects of a pre-consultation  
16 QPS on patient and companion communication. The study has a strong design that incorporates  
17 computerised random allocation, blinding of data-collection staff and the use of audiorecordings as  
18 an objective measure of consultation communication. The analysis of the consultation recordings is  
19 a valuable research method and is a recommended tool for documenting the interaction between  
20 patients and oncologists. [56]  
21  
22  
23  
24  
25  
26  
27  
28  
29  
30  
31  
32  
33

34 There are some limitations to consider. The QPS is not being used prior to the consultation, while,  
35 in previous trials reported in literature, [8-16] patients take the QPS into the consultation to serve as  
36 a reminder to ask questions. We selected this study method to ensure that participating oncologists  
37 are, a) kept blind to the intervention or control status of the patients and b) not forced to change  
38 their routine clinical practice.  
39  
40  
41  
42  
43  
44

45 The findings from this study will provide a basis for further research in the field and provide  
46 potentially important results for clinicians, patients and policy makers that may lead to a wider use  
47 of the QPS .  
48  
49  
50  
51  
52

## 53 54 **ETHICS AND DISSEMINATION PLANS**

55  
56  
57  
58  
59  
60

1  
2  
3 The study was approved by the local Ethics Committees of the Hospital Trust of Verona. The study  
4 is registered at ClinicalTrials.gov (identifier: NCT01510964). This protocol follows the CONSORT  
5 guidelines. [20]  
6  
7

8  
9 Recruitment phase started in June 2011 and will continue till the enrolment will be completed and is  
10 expected to be closed in May 2013. Analysis will start after data monitoring and checking is  
11 completed. The dissemination of the trial findings will principally be carried out through  
12 publications in peer-review journal and presentations at national/international conferences focused  
13 on cancer and/or communication, for examples European Association for Communication in Health  
14 Care Conferences and International Shared Decision Making Conferences.  
15  
16  
17  
18  
19  
20  
21  
22  
23  
24

## 25 **FUNDING**

26  
27 This research received no specific grant from any funding agency in the public, commercial or not-  
28 for-profit sectors.  
29  
30  
31  
32  
33

## 34 **COMPETING INTERESTS**

35  
36 The authors declared that they have no competing interest.  
37  
38  
39

## 40 **AUTHORS' CONTRIBUTIONS**

41  
42 CG, LDP, MR, CZ developed the study protocol and together with AG and MGS supervised the all  
43 procedures. MAM is the trial statistician and is responsible for generating the randomization  
44 sequences and providing guidance on statistical analysis of trial data. MB is the computer scientist  
45 that developed the database to save the data. CG drafted the manuscript in collaboration with RB.  
46  
47  
48 CG will oversee enrolment and data collection. GD, AB, FC, CB, IB, AM, EF, RN, CC, SZ, AA,  
49 FM, ELS, FR participated in enrolling the patients. All authors saw and approved the final version  
50 of the manuscript.  
51  
52  
53  
54  
55  
56  
57  
58  
59  
60

## REFERENCES

1. Buckman R. Breaking bad news: a guide for healthcare professionals. Baltimore, MD: John Hopkins University Press 1992.
2. Baile WF, Buckman R, Lenzi R, et al. AP. SPIKES - A six-step protocol for delivering bad news: Application to the patient with cancer. *Oncologist* 2000;**5**:302-311.
3. Jefford M. & Tattersall M.H. (2002). Informing and involving cancer patients in their own care. *Lancet Oncology* 3(10), 629-637.
4. Joosten EAG, DeFuentes-Merilla L, de Weert GH, Sensky T, et al. Systematic review of the effects of shared decision making on patient satisfaction, treatment adherence and health status. *Psychother Psychosom* 2008;**77**:219-226.
5. Charles C, Gafni A, Whelan T. How to improve communication between doctors and patients. Learning more about the decision making context is important. *BMJ* 2000;**320**:1220-1221.
6. Drew P, Chatwin J, Collins S. Conversation analysis: a method for research into interactions between patients and health-care professionals. *Health Expectat* 2001;**4**:58-70.
7. Zimmermann C, Del Piccolo L, Mazzi MA. Patient cues and medical interviewing in general practice. Examples of the application of sequential analysis. *Epidemiol Psychiatr Soc* 2003;**12**:115-123.
8. Clayton JM, Butow PN, Tattersall MH, et al. Randomized controlled trial of a prompt list to help advanced cancer patients and their caregivers to ask questions about prognosis and end-of-life care. *J Clin Oncol* 2007;**25**:715-723.
9. Butow PN, Dunn SM, Tattersall MHN, et al. Patient participation in the cancer consultation: evaluation of a question prompt sheet. *Ann Oncol* 1994;**5**:199-204.
10. Brown R, Butow PN, Boyer MJ, et al. Promoting patient participation in the cancer consultation: evaluation of a prompt sheet and coaching in question-asking. *Br J Cancer* 1999;**80**:242-248.

- 1  
2  
3 11. Brown RF, Butow PN, Dunn SM, et al. Promoting patient participation and shortening cancer  
4 consultations: a randomised trial. *Br J Cancer* 2001;**8**:1273-1279.
- 5  
6  
7 12. Bruera E, Sweeney C, Willey J, et al. Breast cancer patient perception of the helpfulness of a  
8 prompt sheet versus a general information sheet during outpatient consultation: a randomized  
9 controlled trial. *J Pain Symptom Manage* 2003;**5**:412-419.
- 10  
11  
12 13. Glynne-Jones R, Ostler P, Lumley-Graybow S, et al. Can I look at my list? An evaluation of a  
13 'prompt sheet' within an oncology outpatient clinic. *Clin Oncol* 2006;**18**:395-400.
- 14  
15  
16 14. Clayton J, Butow P, Tattersall M, et al. Asking questions can help: development and  
17 preliminary evaluation of a question prompt list for palliative care patients. *Br J Cancer*  
18 2003;**89**:2069-2077.
- 19  
20  
21 15. Clayton JM, Butow PN, Tattersall MH, et al. Randomized controlled trial of a prompt list to  
22 help advanced cancer patients and their caregivers to ask questions about prognosis and end-  
23 of-life care. *J Clin Oncol* 2007;**25**:715-723.
- 24  
25  
26 16. Van der Meulen N, Jansen J, van Dulmen S, et al. Interventions to improve recall of medical  
27 information in cancer patients: a systematic review of the literature. *Psychooncology*  
28 2008;**17**:857-68.
- 29  
30  
31 17. Van Weert JC, Jansen J, Spreeuwenberg PM, et al. Effects of communication skills training  
32 and a Question Prompt Sheet to improve communication with older cancer patients: a  
33 randomized controlled trial. *Crit Rev Oncol Hematol* 2011;**80**:145-59.
- 34  
35  
36 18. Ohlen J, Balneaves L, Bottorff J, et al. The influence of significant others in complementary  
37 and alternative medicine decisions by cancer patients. *Soc Sci Med* 2006;**63**:1625-1636.
- 38  
39  
40 19. Christman J. Relational autonomy, liberal individualism, and the social constitution of selves.  
41 *Philosophical Studies* 2004;**117**:143-164.
- 42  
43  
44 20. Moher D, Hopewell S, Schulz KF, et al. CONSORT 2010 explanation and elaboration:  
45 updated guidelines for reporting parallel group randomized trials. *BMJ* 2010;**340**:c869. DOI:  
46 10.1136/bmj.c869.
- 47  
48  
49  
50  
51  
52  
53  
54  
55  
56  
57  
58  
59  
60

- 1  
2  
3 21. Istituto Nazionale di Statistica (ISTAT) Web site.  
4  
5 <http://www.demo.istat.it/pop2010/index.html>. Accessed October 24, 2012.  
6
- 7 22. Centro Nazionale di Epidemiologia, Sorveglianza e Promozione della Salute - Istituto  
8  
9 Superiore di Sanità (ISS) Web site. [http://www.tumori.net/it3/banca\\_dati/query.php](http://www.tumori.net/it3/banca_dati/query.php). Accessed  
10  
11 October 24, 2012.  
12
- 13 23. Elwyn G, Hutchings H, Edwards A, et al. The OPTION scale: measuring the extent that  
14  
15 clinicians involve patients in decision-making tasks. *Health Expectat* 2005;**8**:34-42.  
16
- 17 24. Goss C, Fontanesi S, Mazzi MA, et al. The assessment of patient involvement across  
18  
19 consultation. The Italian version of the OPTION scale (in Italian). *Epidemiol Psichiatr Soc*  
20  
21 2007;**16**:339-349.  
22
- 23 25. Goss C, Fontanesi S, Mazzi MA, et al. Shared decision making: the reliability of the OPTION  
24  
25 scale in Italy. *Pat Educ Counsel* 2007;**66**:296-302.  
26  
27
- 28 26. Del Piccolo L, Mazzi MA, Scardoni S, et al. A theory based proposal to evaluate patient-  
29  
30 centred communication in medical consultations: the Verona Patient-centred Communication  
31  
32 Evaluation scale (VR-COPE). *Health Education* 2008;**108**:355-372.  
33  
34
- 35 27. Fassone G, Valcella F, Pallini S, et al. Assessment of Interpersonal Motivation in Transcripts  
36  
37 (AIMIT): an inter- and intra-rater reliability study of a new method of detection of  
38  
39 interpersonal motivational systems in psychotherapy. *Clin Psychol Psychother* 2012;**19**: 224-  
40  
41 34.  
42  
43
- 44 28. Ryan P. sxd1 4: Random allocation of treatments in blocks. *Stata Journal* 2008;**8**:146.  
45  
46
- 47 29. Altman DG, Schulz KF, Moher D, et al. The revised CONSORT statement for reporting  
48  
49 randomized trials: explanation and elaboration. *Ann Intern Med* 2001;**134**:663-94.  
50  
51
- 52 30. Howie JG, Heaney DJ, Maxwell M, et al. A comparison of a Patient Enablement Instrument  
53  
54 (PEI) against two established satisfaction scales as an outcome measure of primary care  
55  
56 consultations. *Fam Pract* 1998;**15**:165-171.  
57  
58  
59  
60

- 1  
2  
3 31. Simon D, Chorr G, Wirtz M, et al. Development and first validation of the shared decision  
4 making questionnaire (SDM-Q). *Pat Educ Counsel* 2006;**63**:319-327.
- 5  
6  
7 32. Kriston L, Scholl I, Hölzel L, et al. The 9-item Shared Decision Making Questionnaire (SDM-  
8 Q-9). Development and psychometric properties in a primary care sample. *Patient Educ*  
9 *Couns.* 2010;**80**:94-9.
- 10  
11  
12 33. Holmes-Rovner M, Kroll J, Schmitt N, et al. Patient satisfaction with health care decisions:  
13 the Satisfaction with Decision Scale. *Med Decis Making* 1996;**16**:58-64.
- 14  
15  
16 34. Gattellari M, Voigt KJ, Butow PN, et al. When the treatment goal is not cure: are cancer  
17 patients equipped to make informed decisions? *J Clin Oncol* 2002;**20**:503-513.
- 18  
19  
20 35. Whelan T, Levine M, Gafni A, et al. Mastectomy or lumpectomy? Helping women make  
21 informed choices. *J Clin Oncol* 1999;**17**:1727-1735.
- 22  
23  
24 36. Van der Feltz-Cornelis CM, Van Oppen P, Van Marwijk HWJ, et al. A patient-doctor  
25 relationship questionnaire (PDRQ-9) in primary care: development and psychometric  
26 evaluation. *Gen Hospit Psychiatry* 2004;**26**:115-120.
- 27  
28  
29 37. Hahn SR, Thompson KS, Wills TA, et al. The difficult doctor-patient relationship:  
30 somatization, personality and psychopathology. *J Clin Epidemiol* 1994;**47**:647-57.
- 31  
32  
33 38. Hahn SR, Kroenke K, Spitzer RL, et al. The difficult patient: prevalence, psychopathology,  
34 and functional impairment. *J Gen Intern Med* 1996;**11**:1-8.
- 35  
36  
37 39. Degner LF, Sloan JA, Venkatesh P. The Control Preferences Scale. *Can J Nurs Res*  
38 1997;**29**:21-43.
- 39  
40  
41 40. Giordano A, Mattarozzi K, Pucci E, et al. Participation in medical decision-making: attitudes  
42 of Italians with multiple sclerosis. *J Neurol Sci* 2008;**275**:86-91.
- 43  
44  
45 41. Spielberger CD. Anxiety as an emotional state. (Vol. 1). New York: Academic Press 1972.
- 46  
47  
48 42. Spielberger CD, Gorsuch RL, Lushene R, et al. Manual for the State-Trait Anxiety Inventory.  
49 Palo Alto, CA: Consulting Psychologists Press 1983.
- 50  
51  
52  
53  
54  
55  
56  
57  
58  
59  
60



- 1  
2  
3 43. Lazzari R, Pancheri P. S.T.A.I. Questionario di autovalutazione dell'ansia di stato e di tratto.  
4  
5 Firenze, IT: Organizzazioni Speciali 1980.  
6  
7 44. Kroenke K, Spitzer RL, Williams JB. The PHQ-9: validity of a brief depression severity  
8  
9 measure. *J Gen Intern Med* 2001;**16**:606-13.  
10  
11 45. Kroenke K, Streine TW, Spitzer RL, et al. The PHQ-8 as a measure of current depression in  
12  
13 general population. *J Affect Disord* 2009;**114**:163-173.  
14  
15 46. Thekkumpurath P, Walker J, Butcher I, et al. Screening for major depression in cancer  
16  
17 outpatients: the diagnostic accuracy of the 9-item patient health questionnaire. *Cancer*  
18  
19 2011;**117**:218-227.  
20  
21 47. Politi PL, Piccinelli M, Wilkinson G. Reliability, validity and factor structure of the 12-item  
22  
23 General Health Questionnaire among young males in Italy. *Acta Psychiatr Scand*  
24  
25 1994;**90**:432-437.  
26  
27 48. Eysenck SBG, Eysenck HJ, Barrett P. A revised version of the psychoticism scale.  
28  
29 *Personality and Individual Differences* 1985;**6**:21-29.  
30  
31 49. O'Connor AM. User Manual-Decision Self-Efficacy Scale. Patient Decision Aids, Ottawa  
32  
33 Hospital Research Institute (OHIR) Web site.  
34  
35 [http://decisionaid.ohri.ca/docs/develop/User\\_Manuals/UM\\_Decision\\_SelfEfficacy.pdf](http://decisionaid.ohri.ca/docs/develop/User_Manuals/UM_Decision_SelfEfficacy.pdf).  
36  
37 Accessed October 24, 2012.  
38  
39  
40  
41  
42 50. De Monchy C, Richardson R, Brown RA, et al. Measuring attitudes of doctors: the doctor-  
43  
44 patient (DP) rating. *Med Educ* 1988;**22**:231-239.  
45  
46  
47 51. StataCorp. Stata Statistical Software: Release 11.2. College Station, TX: StataCorp LP 2011.  
48  
49 52. Pocock SJ. Clinical trials: A practical approach. New York: John Wiley & Sons 1983.  
50  
51 53. Sullivan LM, D'Agostino RB. Robustness and power of analysis of covariance applied to  
52  
53 ordinal scaled data as arising in randomized controlled trials. *Stat Med* 2003;**22**:1317-1334  
54  
55 54. Little R, Yau L. Intent-to-treat analysis for longitudinal studies with drop-outs. *Biometrics*  
56  
57 1996;**52**:1324-1333.  
58  
59  
60

- 1  
2  
3 55. Skrondal A, Rabe-Hesketh S. Generalized latent variable modelling: Multilevel, longitudinal,  
4 and structural equation models. New York: Chapman & Hall/CRC 2004.  
5  
6  
7 56. Tattersall MHN, Butow PN. Consultation audio tapes: an underused cancer patient  
8 information aid and clinical research tool. *Lancet Oncol* 2002;3:431-437.  
9  
10  
11  
12  
13  
14  
15  
16  
17  
18  
19  
20  
21  
22  
23  
24  
25  
26  
27  
28  
29  
30  
31  
32  
33  
34  
35  
36  
37  
38  
39  
40  
41  
42  
43  
44  
45  
46  
47  
48  
49  
50  
51  
52  
53  
54  
55  
56  
57  
58  
59  
60

1  
2  
3 **The INvolvement of breast CANcer patients during oncological consultations. A multi-centre**  
4 **randomized controlled trial. The INCA study protocol.**  
5  
6  
7  
8

9 Claudia Goss\*<sup>1</sup>, Alberto Ghilardi<sup>2</sup>, Giuseppe Deledda<sup>1</sup>, Chiara Buizza<sup>2</sup>, Alessandro Bottacini<sup>1</sup>, Lidia Del Piccolo<sup>1</sup>,  
10 Michela Rimondini<sup>1</sup>, Federica Chiodera<sup>1</sup>, Maria Angela Mazzi<sup>1</sup>, Mario Ballarin<sup>1</sup>, Irene Bighelli<sup>1</sup>, Maria Grazia  
11 Strepparava<sup>3</sup>, Annamaria Molino<sup>4</sup>, Elena Fiorio<sup>4</sup>, Rolando Nortilli<sup>5</sup>, Chiara Caliolio<sup>5</sup>, Serena Zuliani<sup>5</sup>, Alessandra  
12 Auremma<sup>5</sup>, Federica Maspero<sup>5</sup>, Edda Lucia Simoncini<sup>6</sup>, Fulvio Ragni<sup>7</sup>, Richard Brown<sup>8</sup>, Christa Zimmermann<sup>1</sup>  
13  
14  
15  
16  
17  
18

19 <sup>1</sup> Department of Public Health and Community Medicine, Section of Clinical Psychology, University of Verona, Italy

20 <sup>2</sup> Department of Childcare and Biomedical Technologies, Section of Clinical and Dynamic Psychology, Faculty of Medicine and  
21 Surgery, University of Brescia, Italy  
22

23 <sup>3</sup> Department of Experimental Medicine, Section of Clinical Psychology, Faculty of Medicine and Surgery, University of Milano-  
24 Bicocca, Italy  
25

26 <sup>4</sup> O.U. of Oncology d.O., Ospedale Civile Maggiore, Hospital Trust of Verona, Italy  
27

28 <sup>5</sup> O.U. of Oncology, Policlinico G. Rossi, Hospital Trust of Verona, Italy  
29

30 <sup>6</sup> Medical Oncology, Spedali Civili, Brescia, Italy  
31

32 <sup>7</sup> General Surgery 2, Spedali Civili, Brescia, Italy  
33

34 <sup>8</sup> Department of Social and Behavioral Health, School of Medicine, Virginia Commonwealth University, Richmond, VA, USA  
35  
36  
37

38 \*Corresponding author

39 Department of Public Health and Community Medicine

40 University of Verona

41 Policlinico G.B. Rossi, P.le L.A. Scuro 10, 37134 Verona, Italy

42 Tel +39 045 8124441

43 Fax +39 045 8027498

44 Email addresses: claudia.goss@univr.it  
45  
46  
47  
48  
49  
50  
51  
52

53 **Word count: 4549**  
54  
55  
56  
57

58 **Key- word:** patient involvement, breast cancer, doctor-patient communication  
59  
60

## ABSTRACT

**Introduction:** Studies on patient involvement show that physicians make few attempts to involve their patients who ask few questions if not facilitated. On the other hand, patients who participate in the decision making process show greater treatment adherence and have better health outcomes. Different methods to encourage the active participation during oncological consultation have been described, however similar studies in Italy are lacking. The aims of the present study are to 1) assess the effects of a pre-consultation intervention to increase involvement of breast cancer patients during the consultation, and 2) explore the role of attending-companions in the information exchange during the consultation.

**Methods and analysis:** All female patients with breast cancer who attend the Oncology Out-patient Services for the first time will provide informed consent to participate in the study. They are randomly assigned to the intervention or to the control group.

The intervention consists of the presentation of a list of relevant illness-related questions, called a question prompt-sheet (QPS).

The primary outcome measure of the efficacy of the intervention is the number of questions asked by patients during the consultation. Secondary outcomes are: the involvement of the patient by the oncologist; the patient's perceived achievement of her information needs; the patient's satisfaction and ability to cope, the quality of the doctor-patient relationship in terms of patient-centeredness and the number of questions asked by the companions and their involvement during the consultation. All outcome measures are supposed to significantly increase in the intervention group.

**Ethics and Dissemination:** The study was approved by the local Ethics Committee of the Hospital Trust of Verona. Study findings will be disseminated through peer-reviewed publications and conference presentations.

**Trial registration:** ClinicalTrials.gov identifier: NCT01510964

## ARTICLE SUMMARY

### Article focus

- This article assesses if a pre consultation intervention (QPS) facilitates greater participation of patients (and attending companions when present) in the consultation process, by determining an increase in questioning and/or in the number of different illness related issues (e.g. diagnosis, treatment, prognosis) being discussed with the oncologist.
- This article assesses the effect of the QPS on the level of patient involvement by the oncologists, on patient satisfaction and coping, on the oncologist's perception of patient's preferred decisional role and to explore the role of the companion.

### Key messages

- The involvement and participation of patients in therapeutic programs is of great interest not only to physicians but to all health professionals engaged in improving patients' adherence to treatment regimens or operating in the field of health promotion.
- We expect that patients who have the opportunity to rehearse their information needs before the consultation will ask a greater number of questions which in turn will determine their greater involvement by the physician and a greater number of satisfied needs.
- We also expect that the straightforward use of a list of printed questions of potential relevance for cancer patients and their companions at an early stage of illness, by modifying the process of information exchange, will increase their participation and satisfaction with the consultation, with potential benefits for treatment adherence and consequently treatment efficacy.

### Strengths and limitations of this study

- To our knowledge this is the first RCT in Europe which assesses the effects of QPS on cancer patients' involvement during the consultation, on their satisfaction and confidence in coping with illness, and which explores the role of the companion during the consultation.
- QPS in this study is administered before the consultation and collected by the researcher and not available to the patient during the consultation. Thus patients may not remember their questions

1  
2  
3 selected on the QPS and undermine the hypothesis of the greater participation of the QPS  
4  
5 intervention group.  
6  
7  
8  
9  
10  
11  
12  
13  
14  
15  
16  
17  
18  
19  
20  
21  
22  
23  
24  
25  
26  
27  
28  
29  
30  
31  
32  
33  
34  
35  
36  
37  
38  
39  
40  
41  
42  
43  
44  
45  
46  
47  
48  
49  
50  
51  
52  
53  
54  
55  
56  
57  
58  
59  
60

For peer review only

## INTRODUCTION

In recent years the interest in communication issues in cancer care has steadily increased, in particular regarding the information needs of oncology patients, the communication of bad news and the impact of such news on patients, and the development of guidelines on how clinicians can deliver bad news in a sensitive way. [1, 2]

Research evidence suggests that patients have varying preferences for the amount and type of information they desire.[3] Good clinical practice entails oncologists recognizing these variations in patient preferences, and physicians and patients working together to accomplish these preferences. In order to accommodate these varying preferences physicians need elicit patient preferences and to adapt their information giving process to meet these needs. If the expression of such needs is not facilitated or encouraged, these needs tend to remain hidden, consequently patients may perceive that they received too much or too little information. The literature suggests that better quality of patient care and patient outcomes such as coping with illness and treatment adherence are achieved when preferences being met. [4] How the physician conducts the interview and gives information [5] has a direct effect on the participation of the patient. It has been observed that what the physician says has an immediate effect on what the patients says and therefore can also influence the degree of patient participation in the consultation.[6, 7] One proven method to encourage patients to be more active communicators is to provide a Question Prompt Sheets (QPS). [8- 16] QPS are structures lists of prepared questions that prompt patients to consider novel topics before a consultation and decide on question they would like to ask during the consultation. These tools have been shown to increase patient activation during the consultation and aid recall of information after the consultation. Although QPS have been shown to be helpful there is a need to replicate these studies in different cultural contexts in order to test the feasibility of such aids and to support the findings.

In Italy, during the medical consultation, patients are frequently accompanied and assisted by a companion: a close family member or another key person. In this context the activation and

1  
2  
3 involvement of the patient interacts with that of the companion and contributes to the  
4  
5 communication dynamics of the consultation. Olhen and colleagues [18] explored the importance of  
6  
7 significant others in therapeutic decisions and highlighted the notion of “relational autonomy”,  
8  
9 which acknowledges that people are defined by their relationships and are dependent on others in  
10  
11 making decisions. [19] Future research that analyses patients and companions as dyadic units would  
12  
13 offer further insight into the impact of social relations on treatment decision-making processes.  
14  
15 More evidence on the information needs of companions regarding the patient and their role in the  
16  
17 information and decision processes during the consultation is also needed.  
18  
19

20  
21 To our knowledge this is the first RCT in Europe which assesses the effects of a pre-consultation  
22  
23 intervention (QPS) on cancer patients’ involvement during the consultation, on their satisfaction  
24  
25 and confidence in coping with illness, and which explores the role of the companion during the  
26  
27 consultation.  
28  
29

## 30 31 **METHODS AND ANALYSIS**

### 32 33 **Study design**

34  
35 This is a multicentre, randomized controlled trial in which patients are attributed randomly to the  
36  
37 intervention or to the control group on a 1:1 basis. Patients in the intervention group are given the  
38  
39 QPS, a list of 50 specific questions (see below); those in the control group are given a control sheet  
40  
41 on which to write the questions they would like to ask. The oncologists are informed about the  
42  
43 study protocol but are blinded to whether the patient is a participant of the control group or the  
44  
45 intervention group. The oncologists perform their consultation as usual, according to the clinical  
46  
47 practice of their centre. After concluding the consultation, they complete two questionnaires  
48  
49 (DPRQ-10 and CPS, see the Measures section for details) regarding the patient and the consultation.  
50  
51

52  
53 This protocol follows the CONSORT guidelines. [20]

54  
55 Standardized questionnaires are administered at baseline (before the randomization) and  
56  
57 immediately after the consultation (figure 1, table 1).  
58  
59  
60



**Figure 1** INCA Study flow diagram

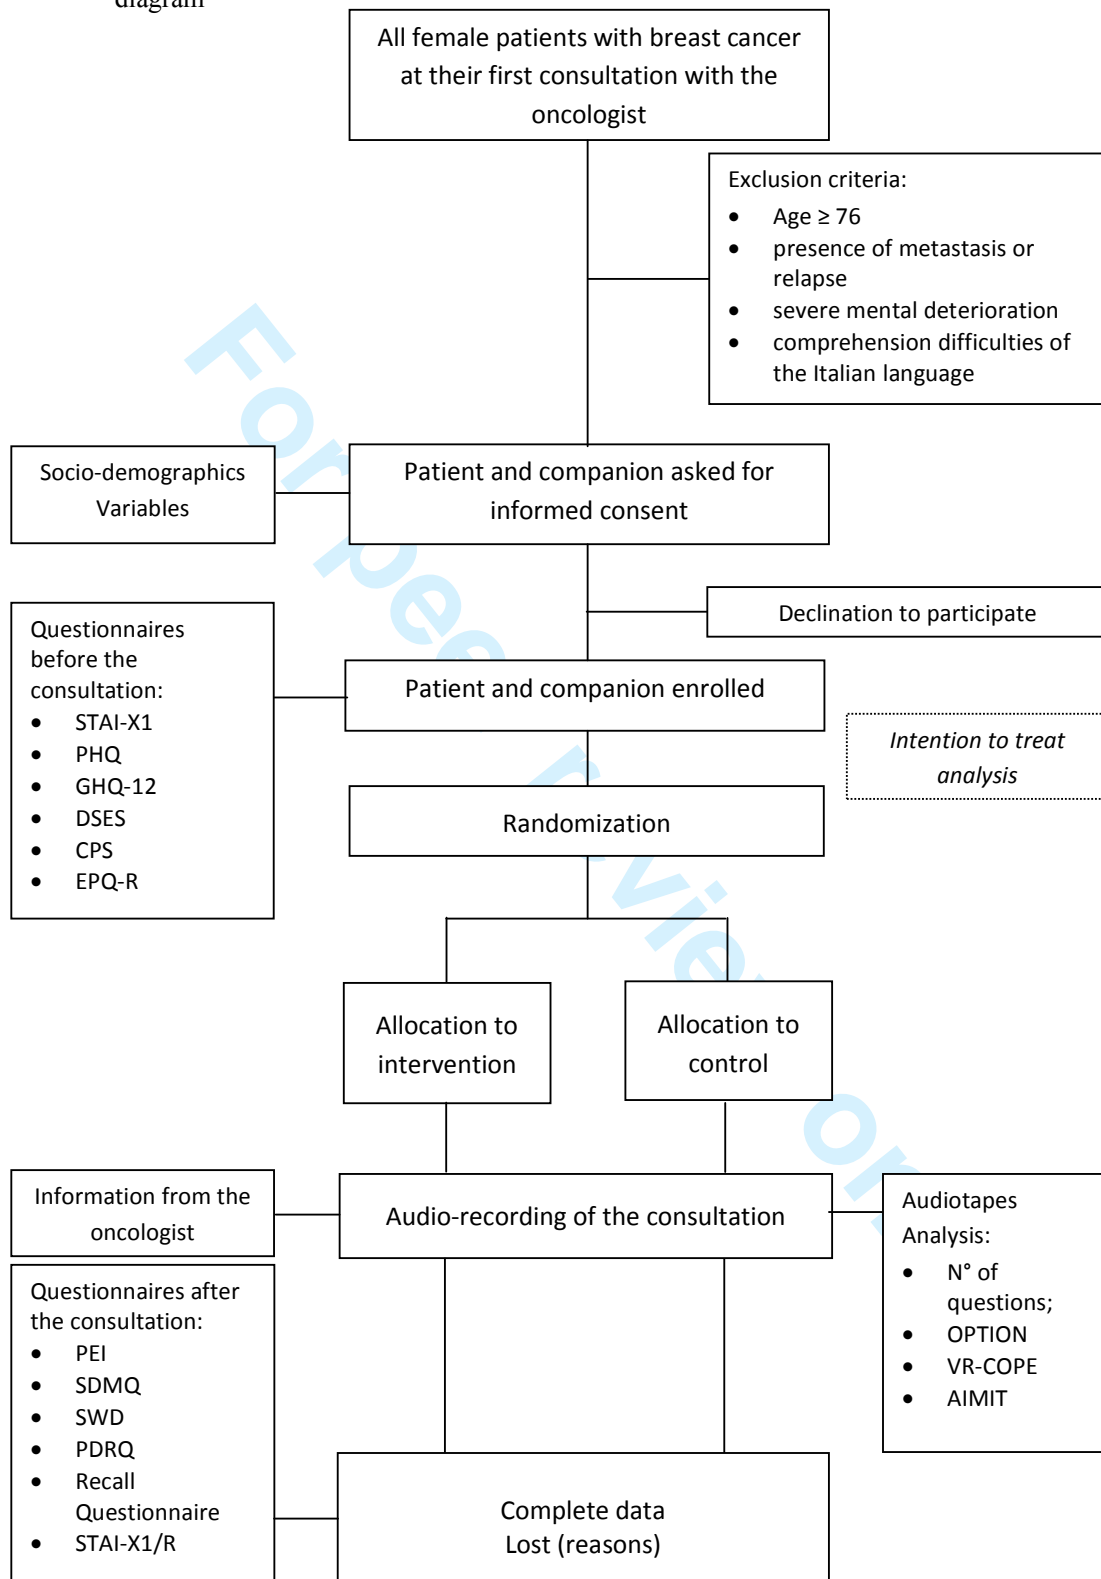

Table 1 Questionnaires and tools used in the study

| Tool                                                                  | Evaluation            | Explored area                                 | N° items                                             | Time                    |
|-----------------------------------------------------------------------|-----------------------|-----------------------------------------------|------------------------------------------------------|-------------------------|
| <b>State-Trait Anxiety Inventory – X1 (STAI-X1)</b>                   | Patient and companion | State anxiety level                           | 20                                                   | Before the consultation |
| <b>Patient Health Questionnaire – 9 (PHQ-9)</b>                       | Patient and companion | Depression                                    | 9                                                    | Before                  |
| <b>General Health Questionnaire – 12 (GHQ-12)</b>                     | Patient and companion | Psychological distress                        | 12                                                   | Before                  |
| <b>Decision Self Efficacy Scale (DSES*)</b>                           | Patient and companion | Confidence with decision                      | 11                                                   | Before                  |
| <b>Control Preference Scale (CPS)</b>                                 | Patient and companion | Role in the decision making process           | 5 vignettes<br>Participant chooses the one preferred | Before                  |
| <b>Eysenck Personality Questionnaire – Reduced form (EPQ-R)</b>       | Patient and companion | Personality traits                            | 24                                                   | Before                  |
| <b>Doctor-Patient Scale (DP)</b>                                      | Oncologists           | Oncologists' communication style              | 48                                                   | One time only           |
| <b>Patient Enablement Instrument (PEI)</b>                            | Patient and companion | Ability to cope with illness                  | 6                                                    | After the consultation  |
| <b>Shared Decision Making Questionnaire (SDMQ*)</b>                   | Patient and companion | Patient involvement                           | 9                                                    | After                   |
| <b>Satisfaction With Decision scale (SWD*)</b>                        | Patient and companion | Satisfaction with decision                    | 6                                                    | After                   |
| <b>Patient-Doctor Relationship Questionnaire – 9 (PDRQ-9*)</b>        | Patient and companion | Doctor-Patient relationship                   | 9                                                    | After                   |
| <b>Recall questionnaire (RECALL*)</b>                                 | Patient and companion | Recalling and understanding of information    | 10                                                   | After                   |
| <b>State-Trait Anxiety Inventory – X1/Reduced form (STAI-X1/R)</b>    | Patient and companion | State anxiety level                           | 10                                                   | After                   |
| <b>Difficult Doctor-Patient Relationship Questionnaire (DDPRQ-10)</b> | Oncologists           | Difficulties in relationship with the patient | 12                                                   | After                   |

|                                                                        |                |                                                      |                                                                               |       |
|------------------------------------------------------------------------|----------------|------------------------------------------------------|-------------------------------------------------------------------------------|-------|
| <b>Control Preference Scale (CPS)</b>                                  | Oncologists    | Patient's role in the decision making process        | 5 vignettes<br>Oncologist chooses the one supposedly preferred by the patient | After |
| <b>AUDIORECORDING</b>                                                  | Consultation   | Interaction between doctor and patient               | -                                                                             | -     |
| <b>Observing Patient Involvement in Decision Making scale (OPTION)</b> | External rater | Professional behaviours intended to involve patients | 12                                                                            | -     |
| <b>Verona Patient-centred Communication Evaluation scale (VR-COPE)</b> | External rater | Aspects of patient-centred communication             | 9                                                                             | -     |
| <b>Assessing Interpersonal Motivations in Transcripts (AIMIT)</b>      | External rater | Activity of interpersonal motivational systems       | Coding system applied on transcripts.                                         | -     |

\*Adapted version for companion

Time required to answer the pre consultation questionnaire is approximately 15 – 20 minutes while the post consultation questionnaire takes between 10 – 15 minutes to complete.

### Intervention

Patients and companions (if present) of both, intervention and control group, receive a form on which to write their reply to the following request: “Please indicate the issues which you want to discuss today with your oncologist”.

Patients and companions (if present) randomized to the intervention group receive the QPS in addition to the form described above. An introduction explains the importance of asking questions during the consultations. The patient (and companion) are invited to select and circle salient questions, if any, from the 50 questions included in the QPS. These questions have been chosen and adapted on the basis of previous studies in the field [ 8-16] and are divided by topics. Questions regard diagnosis (e.g. “Of what type is my cancer?”), treatment (e.g. “Which are the pros and cons

1  
2  
3 of the treatment?), contribution of patient and lifestyle (“What can I do to improve the efficacy of  
4 treatment?”), prognosis (“What are the chances of relapse?”) and other issues (e.g. “Do I need a  
5 referral from my GP for the next visit?”).  
6  
7  
8  
9

## 10 11 **Setting**

12  
13  
14 The patient recruitment phase of this protocol has begun at three Oncology Departments in  
15 Northern Italy: two run by Hospital Trust of Verona in the Veneto region (placed in two different  
16 part of the city) and one by the Hospital Trust of Brescia, in the Lombardia region. The recruitment  
17 phase started in June 2011 and will continue for two years or until the sample size has been reached.  
18  
19  
20 The population of Verona city and its province in 2010 is about 914 382, the population of Brescia  
21 city and its province about 1 242 923. [21] In the Veneto region the estimation of incidence of  
22 breast cancer in 2010 was 4 424 new cases per year (Standardized rate adjusted for age using the  
23 European population as standard (std) per 100,000= 133). In the Lombardia region the estimation of  
24 incidence of breast cancer in 2010 was 7 456 new cases per year (std = 109). [22]  
25  
26  
27  
28  
29  
30  
31  
32  
33

34 The three Oncology departments each have out-patient clinics dedicated to breast cancer patients  
35 with a rotation of 2-5 oncologists. New medical oncology patient appointment are scheduled on  
36 fixed days with a number of 4 - 8 patients per day. Generally in the first visit with the oncologist the  
37 histological results are communicated and further medical treatment is decided (e.g chemotherapy,  
38 hormone therapy). The length of the visit can vary from 30 to 60 minutes.  
39  
40  
41  
42  
43  
44  
45  
46

## 47 **Sample and recruitment**

48  
49 The study sample is composed of consecutive female patients between the age of 18 to 75 years  
50 who attend the Oncology out-patient clinics of the participating centres and who have a recent  
51 diagnosis of breast cancer at an early stage (absence of metastasis). Eligible patients have already  
52 undergone breast surgery (e.g. lumpectomy). Exclusion criteria are the presence of metastasis or  
53  
54  
55  
56  
57  
58  
59  
60

1  
2  
3 relapse, severe mental deterioration, comprehension difficulties of the Italian language. A sample of  
4  
5 300 patients will be recruited, as estimated by the sample size calculation (see below).  
6  
7

### 8 9 **Procedure**

10 Before the patient recruitment phase the oncologists were informed about the study and invited to  
11  
12 participate. Willing oncologist provided written informed consent.  
13

14  
15 Eligible patients attending their first out-patient visit with the oncologist (and their companions if  
16  
17 present), are provided with information about the study by a project member who are available to  
18  
19 answer any questions. Willing patients provide written informed consent to participate in the study  
20  
21 (figure 1).  
22  
23

24  
25 Once consented patients and companions receive an envelope containing six questionnaires to  
26  
27 answer before the consultation (baseline assessment) (table 1). The project staff member (MAM)  
28  
29 then randomly allocates consenting patients and their companions to the intervention or control  
30  
31 group (see also paragraph “Randomization”). Another project staff member (AB, CB, IB or FC)  
32  
33 hands out the envelopes with either the intervention QPS or the control sheet and collect the sheets  
34  
35 after their completion. In order to keep the oncologists blind to the intervention or control status  
36  
37 patients do not take the QPS into the consultation.  
38  
39

40  
41 The subsequent consultation is audio recorded. After the consultation, patients and their  
42  
43 companions complete a further six questionnaires. In the event that a patient or companion is  
44  
45 distressed after the consultation trained project member is present (AB, CB, IB or FC) and provides  
46  
47 support.  
48

49  
50 At the completion of the consultation the oncologists completes a medical details sheet that asks  
51  
52 about the cancer stage and type, when and by whom the patient was informed about diagnosis, and  
53  
54 the therapeutic options appropriate for this patient. They also complete a questionnaire measuring  
55  
56 their perception of the patient as difficult.  
57

58  
59 The audio tapes and oncologists’ forms are collected by the project staff.  
60

1  
2  
3 The audio tapes are examined for the content and number of questions asked by patients and  
4 companions, and are rated applying the OPTION scale, [23-25] which measures the extent to which  
5 the oncologist has succeeded to involve the patient in the consultation. The questions that emerge  
6 during the consultations are compared with those expressed before the visit. The audio recorded  
7 consultations are also analyzed in terms of patient-centredness with the VR-COPE [26] and with the  
8 Assessment of Interpersonal Motivation in Transcripts (AIMIT) [27] which evaluates the five  
9 different motivational systems that guide the verbal and non verbal behaviours during interactions.  
10  
11  
12  
13  
14  
15  
16  
17  
18  
19

### 20 21 **Randomization**

22  
23 The randomization sequence is conducted off-site using the “random allocation of treatments  
24 balanced in blocks (ralloc)” package for Stata [28] and is stratified by centre with a 1:1 allocation  
25 ratio of treatment. Block randomization (size 4) is used to minimize large imbalances between the  
26 intervention groups. The allocation sequences are generated by an independent individual, are  
27 stored in computer files and remain unknown to the researchers until the patient is randomized.  
28  
29  
30  
31  
32

33  
34 The QPS or the control sheet, chosen for the two arms of trial, are placed in opaque envelopes,  
35 sealed and numbered in sequence (following the list generated by the randomization procedure) by  
36 a staff member of each centre (MAM and CB), not involved in the data collection phase. Both  
37 randomization procedure and treatment allocation have been developed to fully conceal treatment  
38 allocation. [20, 29]  
39  
40  
41  
42  
43

44  
45 Patients and oncologists are unaware of the allocation. The raters who analyze the audio- recordings  
46 are also blinded to the allocation of patients.  
47  
48  
49

### 50 51 52 **Study aims and hypotheses**

53  
54 The main aim is to assess if a pre consultation intervention (QPS) facilitates greater participation of  
55 patients in the consultation process, by determining an increase in questioning and/or in the number  
56  
57  
58  
59  
60

1  
2  
3 of different illness related issues (e.g. diagnosis, treatment, prognosis) being discussed with the  
4  
5 oncologist.

6  
7 Other aims are to assess the effect of the QPS on the level of patient involvement by the  
8  
9 oncologists, on patient satisfaction and coping, on the oncologist's perception of patient's preferred  
10  
11 decisional role (using the CPS, more details see the measures section) and to explore the role of the  
12  
13 companion.

14  
15  
16 In detail the study investigates if the intervention determines:

- 17  
18 – a greater number of personal information needs expressed during the consultation (the number  
19  
20 and type of the questions asked during the consultation);
- 21  
22 – the perception of a greater capacity to cope with illness and a greater satisfaction with decisions  
23  
24 made during the consultation (measured with the PEI and SWD; details are described in the  
25  
26 measures section);
- 27  
28 – greater patient generated and/or doctor generated involvement of the patient (using the OPTION  
29  
30 scale and SDM-Q; details are described in the Measures section);
- 31  
32 – a better understanding of the received information and greater satisfaction (measured with the  
33  
34 Recall questionnaire and the SWD);
- 35  
36 – a more accurate identification by the oncologist of patients' preferred role in the therapeutic  
37  
38 decisions (measured with the CPS answered by the oncologist; details are described in the  
39  
40 Measures section);
- 41  
42 – a more supportive doctor-patient relationship perceived by the oncologist's and patient's (using  
43  
44 the PDRQ -9 and DDPRQ-10, see measures section for the details);
- 45  
46 – a more patient-centred and sharing approach during the consultation (using the VR-COPE and  
47  
48 the AIMIT; see Measures section for the details).

49  
50 Extending the QPS to the patient's companion (if present) allows us to explore the impact of the  
51  
52 QPS on the companions' role and participation during the consultation. The number and type of  
53  
54 questions asked by the companion during the consultation are recorded  
55  
56  
57  
58  
59  
60

1  
2  
3 Companions answer the same questionnaires as the patient: PEI for the evaluation of the ability to  
4 cope with the patients' illness, SDM-Q for the evaluation the perceived involvement during the  
5 consultation, SWD for the satisfaction with decision, PDRQ-9 for the doctor-patient-relationship,  
6 and Recall Questionnaire for the understanding of the information received. Where necessary,  
7 questionnaires were adapted to the companions by substituting the first person (I) used in the patient  
8 version, with the third person (she).For example: "I feel confident that I can get the facts about the  
9 medication choices available to her" instead of "I feel confident that I can get the facts about the  
10 medication choices available to me" (item 1 of the DSES Scale).  
11  
12  
13  
14  
15  
16  
17  
18  
19  
20  
21  
22

## 23 **Study measures**

### 24 25 26 27 **Socio demographic and clinical data**

28  
29 Socio demographic data collected from patients are: age, education, family status and employment  
30 status, type of relationship with the companion (if present), reported both by patients and  
31 companions during the baseline assessment.  
32  
33  
34

35  
36 Oncologists' socio demographic data are: age, gender and years of experience. Data for oncology  
37 residents (when present during the consultation) are also obtained.  
38  
39

40  
41 Clinical data are: cancer stage and type, duration of illness (who has informed patient on diagnosis  
42 and when), therapeutic options considered appropriate for this patient, all reported on a form by the  
43 oncologist.  
44  
45  
46  
47  
48

### 49 **Primary outcome measure**

50  
51 The total number of patient's questions during the consultation regarding diagnosis, prognosis,  
52 treatment, lifestyle and other issues. Question asking is considered an index of patient's  
53 participation during the consultation. The QPS aims to increase the number of question by giving  
54 the opportunity to patients to reflect on their informative needs choosing among a wide range of  
55  
56  
57  
58  
59  
60



possible questions those ones perceived as most relevant in view of the subsequent consultation. We hypothesize that patients who are randomized to receive the QPS will ask more questions than patients randomized to the control group.

### Secondary outcome measures

- The number of unmet information needs that emerge during the consultation. This measure is obtained by comparing the number of questions indicated by patients and their companion before the consultation (i.e., those selected in the QPS by patient) with those actually raised during the consultation (i.e., those identified subsequent to listening to the audio-recordings).

– Ability to cope with the illness, measured with the Patient Enablement Instrument (PEI). This questionnaire is a self-administered questionnaire of six items on a Likert scale from 0 (same or less) to 2 (much better, much more) [30]. We hypothesize that patients randomized to the intervention group will have higher “coping with illness” scores compared to patients in the control group.

– Patient involvement, measured with the Shared Decision Making Questionnaire (SDM-Q) and the OPTION Scale. The SDM-Q is a self administered questionnaire of 9 items on a Likert scale from 1 (completely disagree) to 6 (agree completely) that assesses patients’ perception of the decisional process and their level of involvement during the consultation, the information received on therapeutic options, the potential risks and benefits regarding the participation at the decisional process.[31, 32] The OPTION Scale is composed of 12 items of operational definitions of different patient involving skills, rated on a Likert scale from 0 (behaviour absent) to 4 (behaviour observed at an excellent skill level) [23-25]. The scale is applied by trained raters to the audio recording of the consultation. In summary, it examines whether problems are well defined, whether options are formulated, information provided, patient understanding and role preference evaluated, and decisions examined from both the professional and patient perspective. The total score ranges from 0 (0 in all items) to 48 (4 in all items) and is

transformed into a 0 -100 score. We hypothesize that patients randomized to the intervention group will have higher patient involvement during the consultation compared to patients in the control group.

– Satisfaction with decisions made during the consultation, measured with the Satisfaction with Decision Scale (SWD). This is a self-report questionnaire of 6 items on a Likert scale from 0 (completely disagree) to 5 (agree completely) [33]. We hypothesize that patients randomized to the intervention group will have higher patient satisfaction compared to patients in the control group.

– Recalling and understanding of information, measured with the Recall Questionnaire. This questionnaire consists of six items that ask the patient to recall the received information on treatment decisions and pathology (e.g. “What was the treatment decision? Which treatment options were discussed?”). The questions have been prepared for the present study with reference to previous studies.[11, 34, 35] The questionnaire enables an evaluation of the accuracy of patient’s recall and understanding of information delivered during the consultation by comparing the patients’ answers with the contents of the actual consultation discussion gathered from the consultation audiorecording. We hypothesize that patients randomized to the intervention group will recall more precise information compared to patients in the control group.

– Three other questions, rated on a 0 (no at all) to 5 (very much) Likert scale asked whether the patient asked their selected QPS questions, whether the oncologist answered the questions and whether the patient received the information they desired. We hypothesize that patients randomized to the intervention group will feel themselves more successful in question asking compared to patients in the control group.

– Overall consultation atmosphere, is measured with the Verona Patient-centred Communication Evaluation scale (VR-COPE) and the Assessing Interpersonal Motivations in Transcripts (AIMIT). [27] The VR-COPE [26] assesses the content, the process and relational aspects of

1  
2  
3 patient-centred communication during medical consultations on the basis of a multidimensional  
4  
5 evaluation and comprises nine items. Each item is defined by operational definitions and rated  
6  
7 on a 0-10 point scale. The scale is applied by trained raters to the consultation audio-recordings  
8  
9 We expect that patients of the intervention group establish a better relationship with their  
10  
11 oncologist and show higher scores in patient-centred communication.  
12

13  
14 The AIMIT [27] is a coding system applied to transcripts that systematically detects the activity  
15  
16 of five interpersonal motivational systems (attachment, caregiving, rank, sexuality,  
17  
18 cooperation). We hypothesize that patients randomized to the intervention group will more  
19  
20 often evidence a cooperative style during the consultation compared to patients in the control  
21  
22 group.  
23

24  
25 – Perceived Patient-doctor relationship, measured with the Patient – Doctor Relationship  
26  
27 Questionnaire (PDRQ-9) and the Difficult Doctor Patient Relationship Questionnaire (DDPRQ-  
28  
29 10). The PDRQ-9 contains 9 items on a Likert scale with anchors at 1 (not at all appropriate) to  
30  
31 5 (totally appropriate). The scale measures patient perceptions of their relationship with the  
32  
33 doctor.[36] The DDPRQ-10 contains 10 items on a Likert scale anchors at 1 (not at all) to 6 (a  
34  
35 great deal) and is completed by physicians after the encounter with a patient.[37, 38] The  
36  
37 questionnaire identifies the patients experienced as difficult patients. We hypothesize that the  
38  
39 doctor-patient relationship in the intervention group is perceived as less difficult compared to  
40  
41 the control group.  
42

43  
44 – Oncologists answered three questions on the potential presence of anxiety, depression or  
45  
46 emotional distress in the patient and a fourth on their difficulty experienced in answering the  
47  
48 patient's questions. We hypothesize that answering questions of patients in the intervention  
49  
50 group will be perceived by oncologists as less difficult.  
51  
52

53  
54 – Perceived role preference of the patient, measured with the Control Preference Scale (CPS,  
55  
56 Oncologist version) [39, 40]. This scale assesses how the oncologist perceives the role that  
57  
58  
59  
60

1  
2  
3 patient might prefer regarding the decision making process. Oncologists should be better able to  
4  
5 identify patients preferred role in the intervention group.  
6

- 7  
8 – Duration of the consultation, measured in minutes. **We hypothesize a longer duration of the**  
9  
10 **consultation in the intervention group compared to the control group.**  
11

12 –

### 13 14 15 16 **Process related and potential confounding variables**

17  
18 The measures below have been collected in order to check their possible influence on question  
19  
20 asking (primary outcome).  
21

- 22  
23 – Anxiety, depression and general well-being, measured with the State Anxiety Inventory (STAI-  
24  
25 X1, XR), [41-43] the Patient Health Questionnaire depression scale (PHQ-9) [44-46] and the  
26  
27 General Health Questionnaire (GHQ-12) [47].  
28

29  
30 STAI-X1 is a self-administered questionnaire of 20 items on a Likert scale from 1 (not at all) to  
31  
32 4 (very much) completed before the consultation. Higher total scores indicate greater state  
33  
34 anxiety. The STAI-X1R, administered after the consultation, is a shorter version of ten out of  
35  
36 the twenty items of the STAI-X1, and it is used to evaluate the state anxiety level at the end of  
37  
38 the consultation and to compare this level with the one measured at the beginning. PHQ-9 is a  
39  
40 self-assessment questionnaire for detecting the presence of depression and consists of 9 items  
41  
42 with response options of 0 (not at all) to 3 (almost every day), and has a summative score range  
43  
44 of 0 to 27. We score it in the standard way, using the sum of the 0–3 scores for each item, and  
45  
46  $\geq 8$  as a cut-score for possible cases of depression [44-46]. GHQ-12 is a self administrated  
47  
48 questionnaire of 12 items and has a summative score range of 0 to 12 and a cut-score of  $>3$   
49  
50 indicating psychological distress. [47]  
51  
52

- 53  
54 – Personality traits, measured with the Eysenck Personality Questionnaire (EPQR-S) [48]. The  
55  
56 EPQR-S is a self-administered questionnaire of 48 items on yes/no scale. For our study we use  
57  
58 two subscales: the Extraversion/Introversion (12 items) and Neuroticism/Stability (12 items).  
59  
60

1  
2  
3 The “Extroversion” is characterized by being outgoing, talkative, high on positive affect (feeling  
4 good) and in need of external stimulation. The “Neuroticism” or emotionality is characterized  
5 by high levels of negative affect such as depression and anxiety.  
6  
7

- 8  
9  
10 – Confidence with decision, measured with the Decision Self Efficacy Scale (DSES). [49] This  
11 self- administered questionnaire for patients consists of 11 items on a Likert scale from 0 (not at  
12 all confident) to 4 (very confident).  
13  
14  
15  
16 – Patients’ and their companion’s preference for the role they want to have in the decision making  
17 process, measured with the Control Preference Scale (CPS) [39, 40]. This self-administered  
18 instrument contains 5 vignettes with text, depicting different patient roles (from active to  
19 passive) from which patients choose the one considered as most appropriate for them.  
20  
21  
22  
23 – Patient-centred communication style and attitude toward the doctor-patient relationship,  
24 measured with the Doctor-Patient (DP) Scale [50]. The Scale measures the degree of  
25 oncologists’ self reported patient or doctor-centred communication style and attitude. It consists  
26 of 48 statements to rate on a Likert scale from 1 (strong agreement) to 5 (strong disagreement).  
27  
28  
29  
30  
31  
32  
33  
34  
35  
36  
37  
38  
39  
40  
41  
42  
43  
44  
45  
46  
47  
48  
49  
50  
51  
52  
53  
54  
55  
56  
57  
58  
59  
60  
It has a summative score range of 48 to 240. The scale is completed by all oncologists who join  
the study.

### Sample size calculation

A sample of 300 patients will be recruited. This number has been estimated to account for approximately a 15% of withdrawal rate, so that 250-260 patients will complete the study, with about 130 patients in each arm. The primary outcome measure is the number of patient questions. The international literature reports a mean number of nine questions (range 0-53) for breast cancer patients. Since such data are not available in the Italian context, an observational phase was conducted. We recruited a sample of 30 patients (10 for each centre) with the same characteristics, in order to assess the number and type of questions asked by the patient during the consultation, to understand the ongoing interaction between oncologists and patients in a first encounter and to test

1  
2  
3 the feasibility of procedures and questionnaires. This observational study resulted in a mean number  
4  
5 of 18 (sd=13) patient questions asked during a first encounter with the oncologist; no significant  
6  
7 difference was found between the three centres (median test:  $\chi^2=2.4$ ,  $p=0.30$ ).  
8

9  
10 An intervention intended to increase the number of questions might be considered efficacious with  
11  
12 an increase of 30%. The sample size required to evidence such difference was calculated using the  
13  
14 sampsi command of Stata 11, [51] assuming a power of 80% and a two-sided significant level of  
15  
16 5% on a student t-test for differences between independent groups. [52, 53]  
17  
18  
19

### 20 21 **Statistical analysis**

22  
23 The data will be analyzed according to intention-to-treat principle. [54] Standard statistical  
24  
25 techniques will be used to describe characteristics of patients in both groups, and CONSORT flow  
26  
27 diagram will be shown in order to explain the phases of trial and inform on the findings confidence.  
28  
29 [20] The primary outcome, significant increase of patient questions, will be compared in the two  
30  
31 arms using t-test. If adjustment for possible baseline differences among patients (as well as for  
32  
33 oncologists and centres) is needed, an analysis of covariance will be done. Regarding secondary  
34  
35 outcome measures, multilevel analyses will be used to taking into account the specific effect of the  
36  
37 individual oncologist. [55]  
38  
39  
40  
41  
42

### 43 **EXPECTED ACHIEVEMENT**

44  
45 The involvement and participation of patients in therapeutic programs is of great interest not only to  
46  
47 physicians but to all health professionals engaged in improving patients' adherence to treatment  
48  
49 regimens or operating in the field of health promotion.  
50

51  
52 We expect that patients who have the opportunity to rehearse their information needs before the  
53  
54 consultation will ask a greater number of questions and we will observe higher levels of  
55  
56 involvement by the physician and a higher number of met information needs. The use of a simple  
57  
58 question prompt sheet may improve the overall communication between oncologist and patient.  
59  
60

1  
2  
3 This intervention will be easy to disseminate and use in routine clinical practice to increase patient  
4  
5 and companion participation.  
6  
7

## 8 9 **DISCUSSION**

10  
11 It has been demonstrated in English speaking countries that a QPS is a useful tool to improve  
12  
13 patient's participation during the consultation. However, we contend that consultation  
14  
15 communication may vary across cultures and thus there is a need to explore the efficacy of a QPS in  
16  
17 Non English speaking countries to explore cross cultural differences. To our knowledge there are  
18  
19 no published randomized controlled trials in Europe that assess the effects of a pre-consultation  
20  
21 QPS on patient and companion communication. The study has a strong design that incorporates  
22  
23 computerised random allocation, blinding of data-collection staff and the use of audiorecordings as  
24  
25 an objective measure of consultation communication. The analysis of the consultation recordings is  
26  
27 a valuable research method and is a recommended tool for documenting the interaction between  
28  
29 patients and oncologists. [56]  
30  
31  
32

33  
34 There are some limitations to consider. The QPS is not being used prior to the consultation, while,  
35  
36 in previous trials reported in literature, [8-16] patients take the QPS into the consultation to serve as  
37  
38 a reminder to ask questions. We selected this study method to ensure that participating oncologists  
39  
40 are, a) kept blind to the intervention or control status of the patients and b) not forced to change  
41  
42 their routine clinical practice.  
43  
44

45  
46 The findings from this study will provide a basis for further research in the field and provide  
47  
48 potentially important results for clinicians, patients and policy makers that may lead to a wider use  
49  
50 of the QPS .  
51

## 52 53 **ETHICS AND DISSEMINATION PLANS**

1  
2  
3 The study was approved by the local Ethics Committees of the Hospital Trust of Verona. The study  
4 is registered at ClinicalTrials.gov (identifier: NCT01510964). This protocol follows the CONSORT  
5  
6  
7 guidelines. [20]

8  
9  
10 Recruitment phase started in June 2011 and will continue till the enrolment will be completed and is  
11  
12 expected to be closed in May 2013. Analysis will start after data monitoring and checking is  
13  
14 completed. The dissemination of the trial findings will principally be carried out through  
15  
16 publications in peer-review journal and presentations at national/international conferences focused  
17  
18 on cancer and/or communication, for examples European Association for Communication in Health  
19  
20 Care Conferences and International Shared Decision Making Conferences.  
21

## 22 23 24 25 **FUNDING**

26  
27 This research received no specific grant from any funding agency in the public, commercial or not-  
28  
29 for-profit sectors.  
30

## 31 32 33 34 **COMPETING INTERESTS**

35  
36 The authors declared that they have no competing interest.  
37  
38  
39

## 40 41 42 43 **AUTHORS' CONTRIBUTIONS**

44  
45 CG, LDP, MR, CZ developed the study protocol and together with AG and MGS supervised the all  
46  
47 procedures. MAM is the trial statistician and is responsible for generating the randomization  
48  
49 sequences and providing guidance on statistical analysis of trial data. MB is the computer scientist  
50  
51 that developed the database to save the data. CG drafted the manuscript in collaboration with RB.  
52  
53 CG will oversee enrolment and data collection. GD, AB, FC, CB, IB, AM, EF, RN, CC, SZ, AA,  
54  
55 FM, ELS, FR participated in enrolling the patients. All authors saw and approved the final version  
56  
57 of the manuscript.  
58  
59  
60



## REFERENCES

1. Buckman R. Breaking bad news: a guide for healthcare professionals. Baltimore, MD: John Hopkins University Press 1992.
2. Baile WF, Buckman R, Lenzi R, et al. AP. SPIKES - A six-step protocol for delivering bad news: Application to the patient with cancer. *Oncologist* 2000;**5**:302-311.
3. Jefford M. & Tattersall M.H. (2002). Informing and involving cancer patients in their own care. *Lancet Oncology* 3(10), 629-637.
4. Joosten EAG, DeFuentes-Merilla L, de Weert GH, Sensky T, et al. Systematic review of the effects of shared decision making on patient satisfaction, treatment adherence and health status. *Psychother Psychosom* 2008;**77**:219-226.
5. Charles C, Gafni A, Whelan T. How to improve communication between doctors and patients. Learning more about the decision making context is important. *BMJ* 2000;**320**:1220-1221.
6. Drew P, Chatwin J, Collins S. Conversation analysis: a method for research into interactions between patients and health-care professionals. *Health Expectat* 2001;**4**:58-70.
7. Zimmermann C, Del Piccolo L, Mazzi MA. Patient cues and medical interviewing in general practice. Examples of the application of sequential analysis. *Epidemiol Psychiatr Soc* 2003;**12**:115-123.
8. Clayton JM, Butow PN, Tattersall MH, et al. Randomized controlled trial of a prompt list to help advanced cancer patients and their caregivers to ask questions about prognosis and end-of-life care. *J Clin Oncol* 2007;**25**:715-723.
9. Butow PN, Dunn SM, Tattersall MHN, et al. Patient participation in the cancer consultation: evaluation of a question prompt sheet. *Ann Oncol* 1994;**5**:199-204.
10. Brown R, Butow PN, Boyer MJ, et al. Promoting patient participation in the cancer consultation: evaluation of a prompt sheet and coaching in question-asking. *Br J Cancer* 1999;**80**:242-248.

- 1  
2  
3 11. Brown RF, Butow PN, Dunn SM, et al. Promoting patient participation and shortening cancer  
4 consultations: a randomised trial. *Br J Cancer* 2001;**8**:1273-1279.
- 5  
6  
7 12. Bruera E, Sweeney C, Willey J, et al. Breast cancer patient perception of the helpfulness of a  
8 prompt sheet versus a general information sheet during outpatient consultation: a randomized  
9 controlled trial. *J Pain Symptom Manage* 2003;**5**:412-419.
- 10  
11  
12 13. Glynne-Jones R, Ostler P, Lumley-Graybow S, et al. Can I look at my list? An evaluation of a  
13 'prompt sheet' within an oncology outpatient clinic. *Clin Oncol* 2006;**18**:395-400.
- 14  
15  
16 14. Clayton J, Butow P, Tattersall M, et al. Asking questions can help: development and  
17 preliminary evaluation of a question prompt list for palliative care patients. *Br J Cancer*  
18 2003;**89**:2069-2077.
- 19  
20  
21 15. Clayton JM, Butow PN, Tattersall MH, et al. Randomized controlled trial of a prompt list to  
22 help advanced cancer patients and their caregivers to ask questions about prognosis and end-  
23 of-life care. *J Clin Oncol* 2007;**25**:715-723.
- 24  
25  
26 16. Van der Meulen N, Jansen J, van Dulmen S, et al. Interventions to improve recall of medical  
27 information in cancer patients: a systematic review of the literature. *Psychooncology*  
28 2008;**17**:857-68.
- 29  
30  
31 17. Van Weert JC, Jansen J, Spreeuwenberg PM, et al. Effects of communication skills training  
32 and a Question Prompt Sheet to improve communication with older cancer patients: a  
33 randomized controlled trial. *Crit Rev Oncol Hematol* 2011;**80**:145-59.
- 34  
35  
36 18. Ohlen J, Balneaves L, Bottorff J, et al. The influence of significant others in complementary  
37 and alternative medicine decisions by cancer patients. *Soc Sci Med* 2006;**63**:1625-1636.
- 38  
39  
40 19. Christman J. Relational autonomy, liberal individualism, and the social constitution of selves.  
41 *Philosophical Studies* 2004;**117**:143-164.
- 42  
43  
44 20. Moher D, Hopewell S, Schulz KF, et al. CONSORT 2010 explanation and elaboration:  
45 updated guidelines for reporting parallel group randomized trials. *BMJ* 2010;**340**:c869. DOI:  
46 10.1136/bmj.c869.
- 47  
48  
49  
50  
51  
52  
53  
54  
55  
56  
57  
58  
59  
60

- 1  
2  
3 21. Istituto Nazionale di Statistica (ISTAT) Web site.  
4  
5 <http://www.demo.istat.it/pop2010/index.html>. Accessed October 24, 2012.  
6
- 7 22. Centro Nazionale di Epidemiologia, Sorveglianza e Promozione della Salute - Istituto  
8  
9 Superiore di Sanità (ISS) Web site. [http://www.tumori.net/it3/banca\\_dati/query.php](http://www.tumori.net/it3/banca_dati/query.php). Accessed  
10  
11 October 24, 2012.  
12
- 13 23. Elwyn G, Hutchings H, Edwards A, et al. The OPTION scale: measuring the extent that  
14  
15 clinicians involve patients in decision-making tasks. *Health Expectat* 2005;**8**:34-42.  
16
- 17 24. Goss C, Fontanesi S, Mazzi MA, et al. The assessment of patient involvement across  
18  
19 consultation. The Italian version of the OPTION scale (in Italian). *Epidemiol Psichiatr Soc*  
20  
21 2007;**16**:339-349.  
22
- 23 25. Goss C, Fontanesi S, Mazzi MA, et al. Shared decision making: the reliability of the OPTION  
24  
25 scale in Italy. *Pat Educ Counsel* 2007;**66**:296-302.  
26  
27
- 28 26. Del Piccolo L, Mazzi MA, Scardoni S, et al. A theory based proposal to evaluate patient-  
29  
30 centred communication in medical consultations: the Verona Patient-centred Communication  
31  
32 Evaluation scale (VR-COPE). *Health Education* 2008;**108**:355-372.  
33  
34
- 35 27. Fassone G, Valcella F, Pallini S, et al. Assessment of Interpersonal Motivation in Transcripts  
36  
37 (AIMIT): an inter- and intra-rater reliability study of a new method of detection of  
38  
39 interpersonal motivational systems in psychotherapy. *Clin Psychol Psychother* 2012;**19**: 224-  
40  
41 34.  
42  
43
- 44 28. Ryan P. sxd1 4: Random allocation of treatments in blocks. *Stata Journal* 2008;**8**:146.  
45  
46
- 47 29. Altman DG, Schulz KF, Moher D, et al. The revised CONSORT statement for reporting  
48  
49 randomized trials: explanation and elaboration. *Ann Intern Med* 2001;**134**:663-94.  
50  
51
- 52 30. Howie JG, Heaney DJ, Maxwell M, et al. A comparison of a Patient Enablement Instrument  
53  
54 (PEI) against two established satisfaction scales as an outcome measure of primary care  
55  
56 consultations. *Fam Pract* 1998;**15**:165-171.  
57  
58  
59  
60

- 1  
2  
3 31. Simon D, Chorr G, Wirtz M, et al. Development and first validation of the shared decision  
4 making questionnaire (SDM-Q). *Pat Educ Counsel* 2006;**63**:319-327.
- 5  
6  
7 32. Kriston L, Scholl I, Hölzel L, et al. The 9-item Shared Decision Making Questionnaire (SDM-  
8 Q-9). Development and psychometric properties in a primary care sample. *Patient Educ*  
9 *Couns.* 2010;**80**:94-9.
- 10  
11  
12 33. Holmes-Rovner M, Kroll J, Schmitt N, et al. Patient satisfaction with health care decisions:  
13 the Satisfaction with Decision Scale. *Med Decis Making* 1996;**16**:58-64.
- 14  
15  
16 34. Gattellari M, Voigt KJ, Butow PN, et al. When the treatment goal is not cure: are cancer  
17 patients equipped to make informed decisions? *J Clin Oncol* 2002;**20**:503-513.
- 18  
19  
20 35. Whelan T, Levine M, Gafni A, et al. Mastectomy or lumpectomy? Helping women make  
21 informed choices. *J Clin Oncol* 1999;**17**:1727-1735.
- 22  
23  
24 36. Van der Feltz-Cornelis CM, Van Oppen P, Van Marwijk HWJ, et al. A patient-doctor  
25 relationship questionnaire (PDRQ-9) in primary care: development and psychometric  
26 evaluation. *Gen Hospit Psychiatry* 2004;**26**:115-120.
- 27  
28  
29 37. Hahn SR, Thompson KS, Wills TA, et al. The difficult doctor-patient relationship:  
30 somatization, personality and psychopathology. *J Clin Epidemiol* 1994;**47**:647-57.
- 31  
32  
33 38. Hahn SR, Kroenke K, Spitzer RL, et al. The difficult patient: prevalence, psychopathology,  
34 and functional impairment. *J Gen Intern Med* 1996;**11**:1-8.
- 35  
36  
37 39. Degner LF, Sloan JA, Venkatesh P. The Control Preferences Scale. *Can J Nurs Res*  
38 1997;**29**:21-43.
- 39  
40  
41 40. Giordano A, Mattarozzi K, Pucci E, et al. Participation in medical decision-making: attitudes  
42 of Italians with multiple sclerosis. *J Neurol Sci* 2008;**275**:86-91.
- 43  
44  
45 41. Spielberger CD. Anxiety as an emotional state. (Vol. 1). New York: Academic Press 1972.
- 46  
47  
48 42. Spielberger CD, Gorsuch RL, Lushene R, et al. Manual for the State-Trait Anxiety Inventory.  
49 Palo Alto, CA: Consulting Psychologists Press 1983.
- 50  
51  
52  
53  
54  
55  
56  
57  
58  
59  
60

- 1  
2  
3 43. Lazzari R, Pancheri P. S.T.A.I. Questionario di autovalutazione dell'ansia di stato e di tratto.  
4  
5 Firenze, IT: Organizzazioni Speciali 1980.  
6  
7 44. Kroenke K, Spitzer RL, Williams JB. The PHQ-9: validity of a brief depression severity  
8  
9 measure. *J Gen Intern Med* 2001;**16**:606-13.  
10  
11 45. Kroenke K, Streine TW, Spitzer RL, et al. The PHQ-8 as a measure of current depression in  
12  
13 general population. *J Affect Disord* 2009;**114**:163-173.  
14  
15 46. Thekkumpurath P, Walker J, Butcher I, et al. Screening for major depression in cancer  
16  
17 outpatients: the diagnostic accuracy of the 9-item patient health questionnaire. *Cancer*  
18  
19 2011;**117**:218-227.  
20  
21 47. Politi PL, Piccinelli M, Wilkinson G. Reliability, validity and factor structure of the 12-item  
22  
23 General Health Questionnaire among young males in Italy. *Acta Psychiatr Scand*  
24  
25 1994;**90**:432-437.  
26  
27 48. Eysenck SBG, Eysenck HJ, Barrett P. A revised version of the psychoticism scale.  
28  
29 *Personality and Individual Differences* 1985;**6**:21-29.  
30  
31 49. O'Connor AM. User Manual-Decision Self-Efficacy Scale. Patient Decision Aids, Ottawa  
32  
33 Hospital Research Institute (OHIR) Web site.  
34  
35 [http://decisionaid.ohri.ca/docs/develop/User\\_Manuals/UM\\_Decision\\_SelfEfficacy.pdf](http://decisionaid.ohri.ca/docs/develop/User_Manuals/UM_Decision_SelfEfficacy.pdf).  
36  
37 Accessed October 24, 2012.  
38  
39  
40  
41  
42 50. De Monchy C, Richardson R, Brown RA, et al. Measuring attitudes of doctors: the doctor-  
43  
44 patient (DP) rating. *Med Educ* 1988;**22**:231-239.  
45  
46  
47 51. StataCorp. Stata Statistical Software: Release 11.2. College Station, TX: StataCorp LP 2011.  
48  
49 52. Pocock SJ. Clinical trials: A practical approach. New York: John Wiley & Sons 1983.  
50  
51 53. Sullivan LM, D'Agostino RB. Robustness and power of analysis of covariance applied to  
52  
53 ordinal scaled data as arising in randomized controlled trials. *Stat Med* 2003;**22**:1317-1334  
54  
55  
56 54. Little R, Yau L. Intent-to-treat analysis for longitudinal studies with drop-outs. *Biometrics*  
57  
58 1996;**52**:1324-1333.  
59  
60

- 1  
2  
3 55. Skrondal A, Rabe-Hesketh S. Generalized latent variable modelling: Multilevel, longitudinal,  
4 and structural equation models. New York: Chapman & Hall/CRC 2004.  
5  
6  
7 56. Tattersall MHN, Butow PN. Consultation audio tapes: an underused cancer patient  
8 information aid and clinical research tool. *Lancet Oncol* 2002;3:431-437.  
9  
10  
11  
12  
13  
14  
15  
16  
17  
18  
19  
20  
21  
22  
23  
24  
25  
26  
27  
28  
29  
30  
31  
32  
33  
34  
35  
36  
37  
38  
39  
40  
41  
42  
43  
44  
45  
46  
47  
48  
49  
50  
51  
52  
53  
54  
55  
56  
57  
58  
59  
60

For peer review only
